# Supplementary material for: Whole‐genome analyses disentangle reticulate evolution of primroses in a biodiversity hotspot
Source: PubMed Central journal article supplement — New Phytol. 2022 Nov 15;237(2):656–71. doi: 10.1111/nph.18525 (PMC10099377; doi:10.1111/nph.18525), 2022-11-15
Supplement: NPH-237-656-s001.pdf [file NPH-237-656-s001.pdf]

## **New Phytologist Supporting Information**

Article title: **Whole Genome Analyses Disentangle Reticulate Evolution of Primroses in a Biodiversity Hotspot**

Authors: Rebecca L. Stubbs<sup>1¶</sup>, Spyros Theodoridis<sup>2¶</sup>, Emiliano Mora-Carrera<sup>1</sup>, Barbara Keller<sup>1</sup>, Narjes Yousefi<sup>1</sup>, Giacomo Potente<sup>1</sup>, Étienne Lévillé-Bourret<sup>3</sup>, Ferhat Celep<sup>4</sup>, Judita Kochjarová<sup>5</sup>, Giorgi Tedoradze<sup>6</sup>, Deren A.R. Eaton<sup>7</sup>, Elena Conti<sup>1\*</sup>

Article acceptance date: 26 September 2022

The following Supporting Information is available for this article:

**Fig. S1** Multispecies coalescent phylogeny of *Primula* sect. *Primula* made in ASTRAL-III.

**Fig. S2** gCF and sCF for all phylogenies.

**Fig. S3** Chloroplast phylogeny of *Primula* sect. *Primula*.

**Fig. S4** S-locus phylogeny of *Primula* sect. *Primula*.

**Fig. S5** Fbranch (*f*b) analysis in Dsuite with multispecies coalescent topology.

**Fig. S6** Ancestral range estimation under a Bayesian framework with phylogram.

**Fig. S7** Ancestral range estimation under a Bayesian framework with chronogram.

**Table S1** *Primula* specimens used in study.

**Table S2** Fbranch values from Dsuite.

**Table S3** Results from D<sub>FOIL</sub>.

**Table S4** D-statistics, *f*<sub>4</sub>-ratios, Z-score, and *f*<sub>4</sub>-ratio from Dsuite for all species trios.

**Table S5** Posterior probabilities for every state in ancestral state estimation with phylogram.

**Methods S1** Geographic Sampling.

**Methods S2** Species networks estimation with NANUQ.

**Methods S3** Supplementary D-statistic analyses.

**Methods S4** Ancestral Range Estimation.

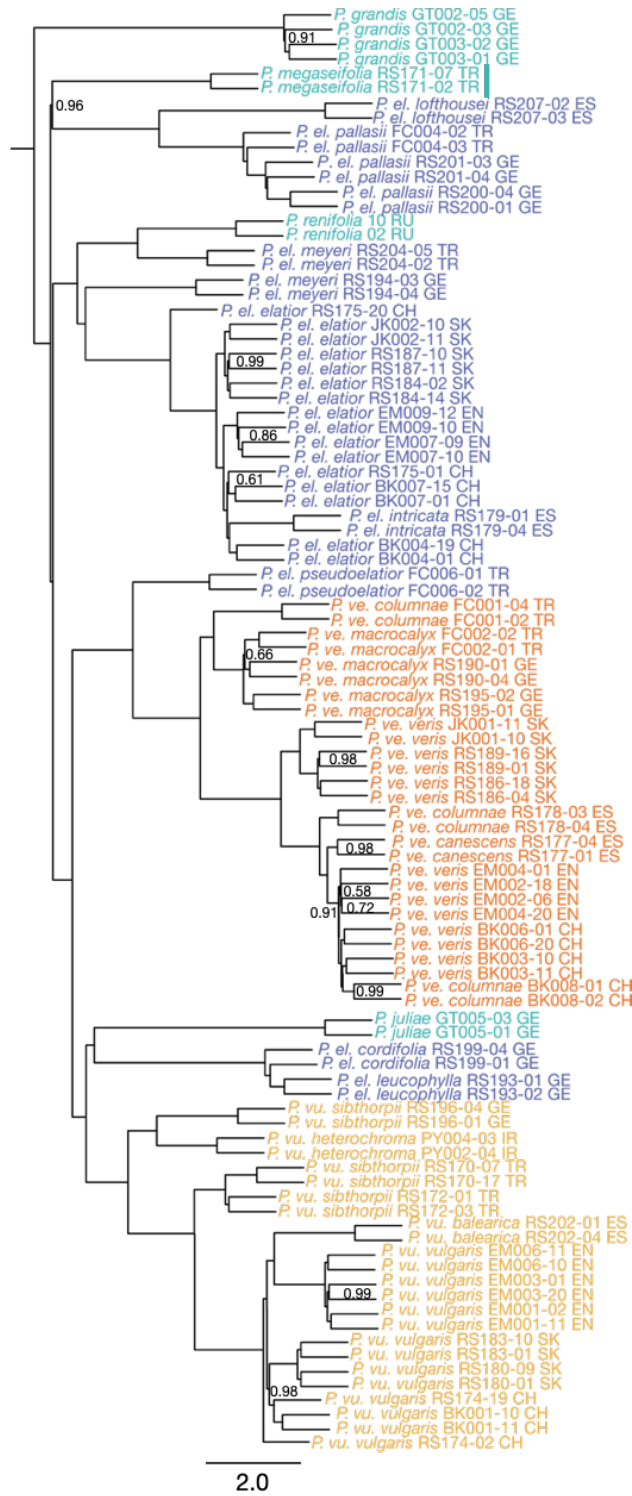

**Fig. S1** Multispecies coalescent phylogeny of *Primula* sect. *Primula* made in ASTRAL-III. Branches with <1.0 local posterior probability (PP) are labeled. Branch lengths are presented in coalescent units. Outgroups not shown. Abbreviations: *P. ve.* = *P. veris*, *P. vu.* = *P. vulgaris*, *P. el.* = *P. elatior*, EN = England, CH = Switzerland, SK = Slovakia, GE = Georgia, TR = Turkey, ES = Spain, IR = Iran, RU = Russia.

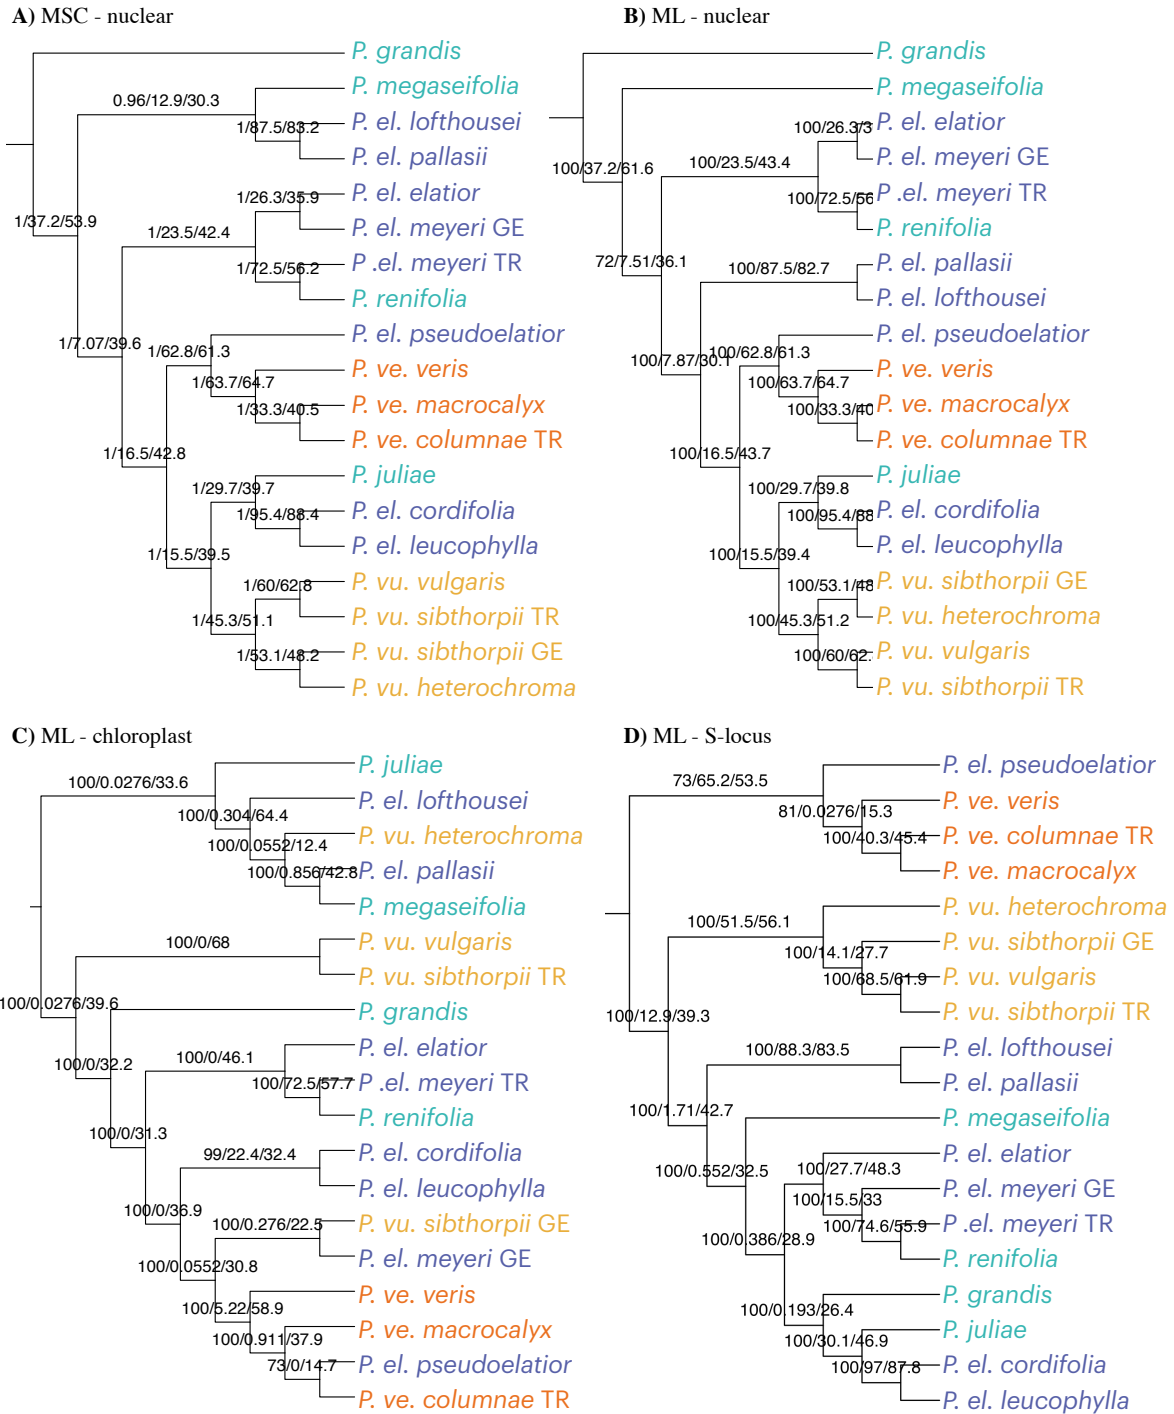

**Fig. S2** Gene and site concordance factors (gCF and sCF, respectively) for different genomic compartments. Branch labels are as follows (from left to right): branch support, gCF, sCF. Branch support is local posterior probability in A and bootstrap support in B, C, and D. MSC = Multispecies Coalescent, ML= Maximum Likelihood.

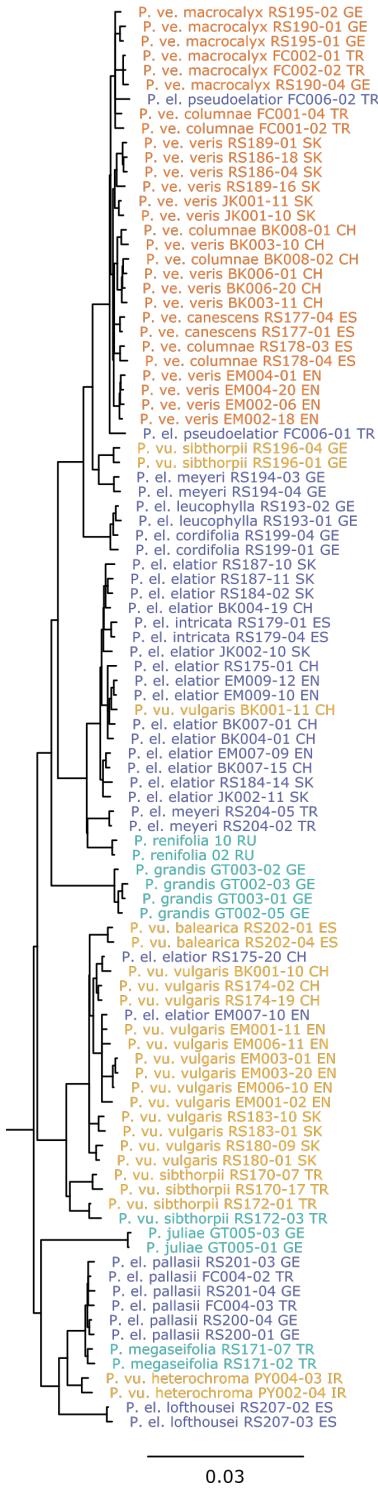

**Fig. S3** Chloroplast phylogeny of *Primula* sect. *Primula*. Branches with <90% bootstrap (BS) are collapsed. Outgroups not shown. Abbreviations: *P. ve.* = *P. veris*, *P. vu.* = *P. vulgaris*, *P. el.* = *P. elatior*, EN = England, CH = Switzerland, SK = Slovakia, GE = Georgia, TR = Turkey, ES = Spain, IR = Iran, RU = Russia.

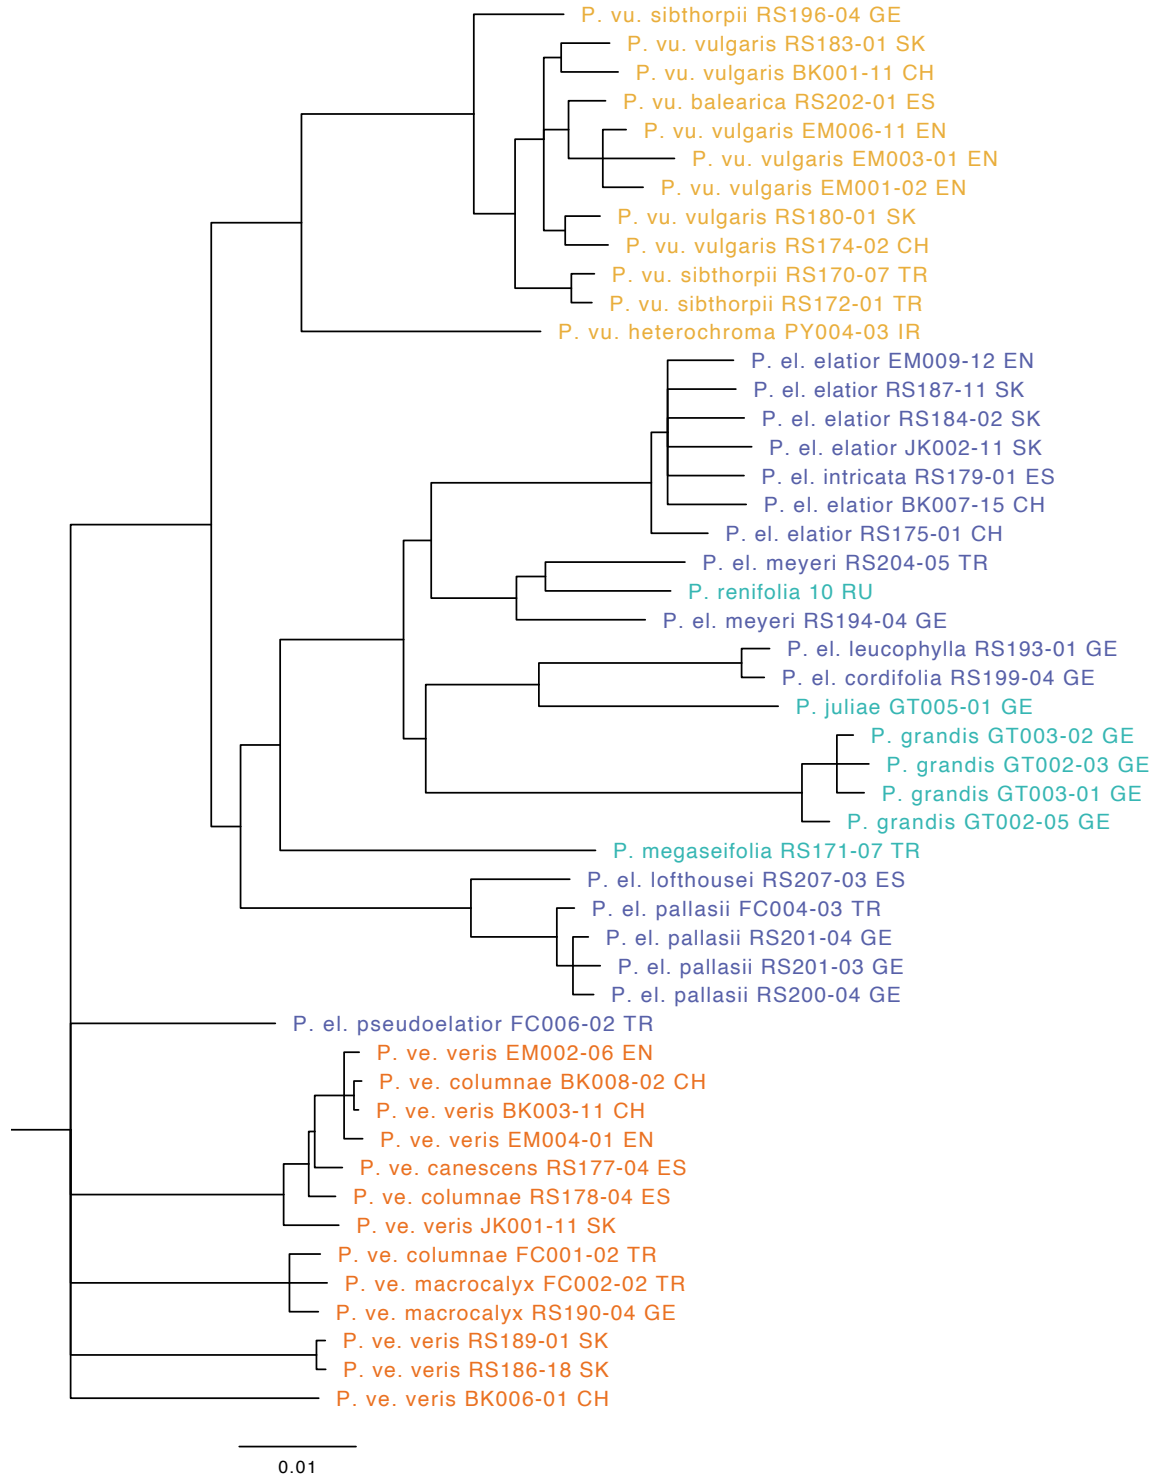

**Fig. S4** S-locus phylogeny of *Primula* sect. *Primula*. Branches with <90% bootstrap (BS) are collapsed. S-locus phylogeny constructed from specimens with S-morph (short-styled) and homostylous specimens. Outgroups not shown. Abbreviations: *P. ve.* = *P. veris*, *P. vu.* = *P. vulgaris*, *P. el.* = *P. elatior*, EN = England, CH = Switzerland, SK = Slovakia, GE = Georgia, TR = Turkey, ES = Spain, IR = Iran, RU = Russia.

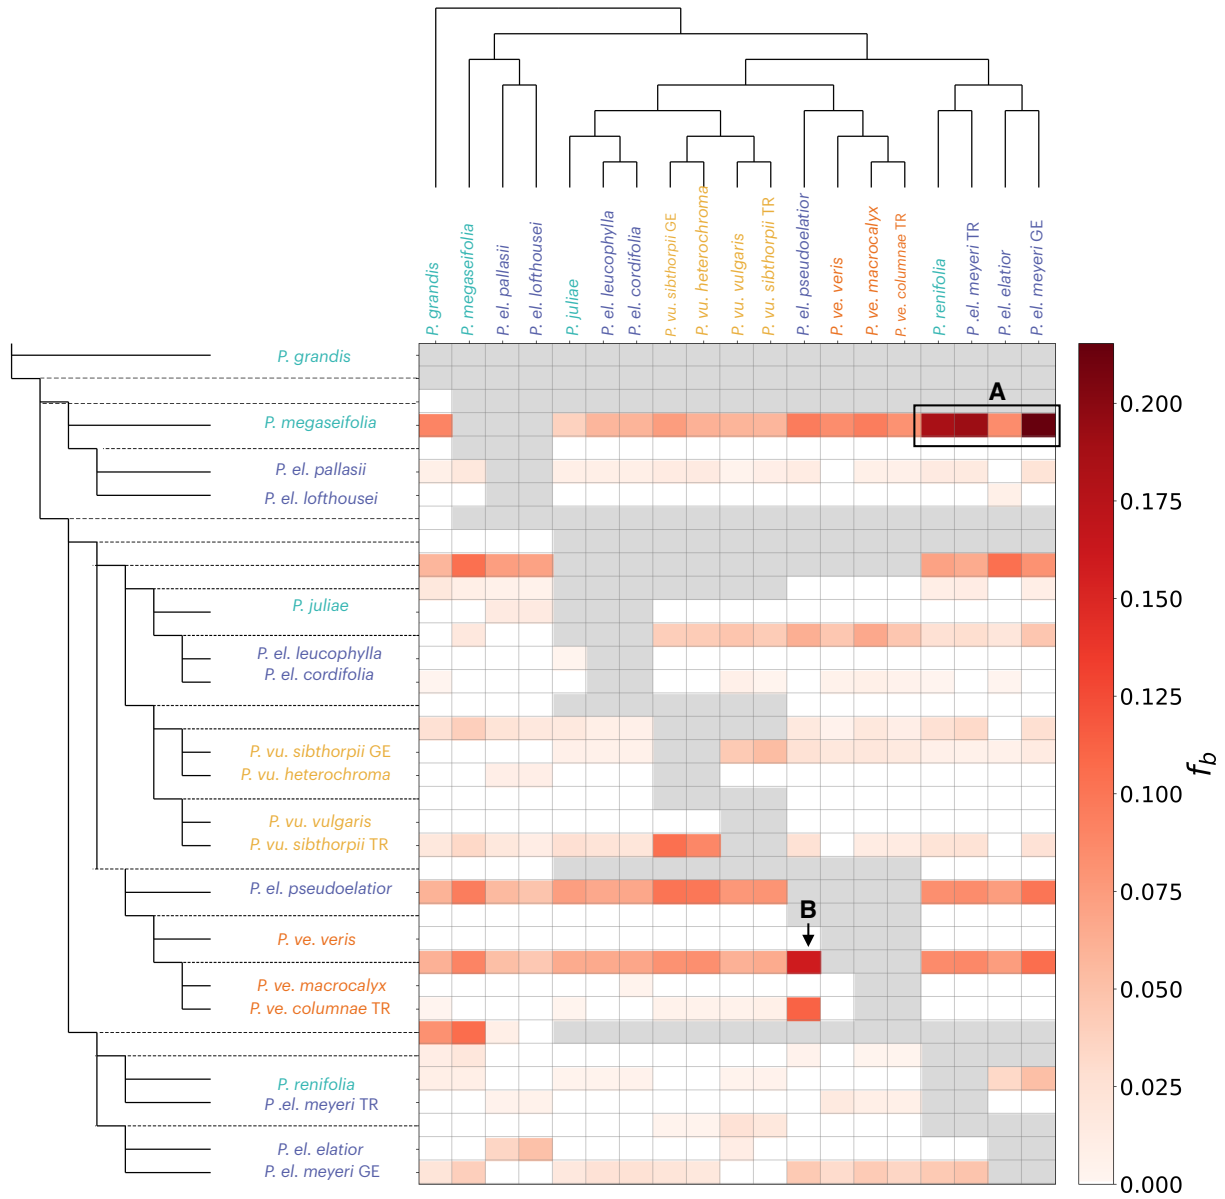

**Fig. S5** Evidence of gene flow in *Primula* sect. *Primula* with multispecies coalescent topology. Results of the Fbranch ( $f_b$ ) analysis in Dsuite. The values in the matrix signify excess allele sharing between the branch identified on the tree on the y-axis, which includes internal branches, and the species identified on the x-axis, relative to its sister branch. The light violet to dark purple gradient in the matrix refers to excess allele sharing, and white squares correspond to 0, non-significant values, or correspond to tests that are not consistent with the phylogeny. The tree is displayed in an ‘expanded’ form along the y axis, so that each branch, including internal branches, points to a corresponding row in the matrix. The two highest number of shared alleles are designated with A and B. A) Excess of shared alleles between *P. megaseifolia* and the ancestor of *P. el. elatior*, *P. el. meyeri*, and *P. renifolia*. B) Excess of shared alleles between *P. el. pseudoelatior* and the ancestor of *P. ve. macrocalyx* and *P. columnae*.

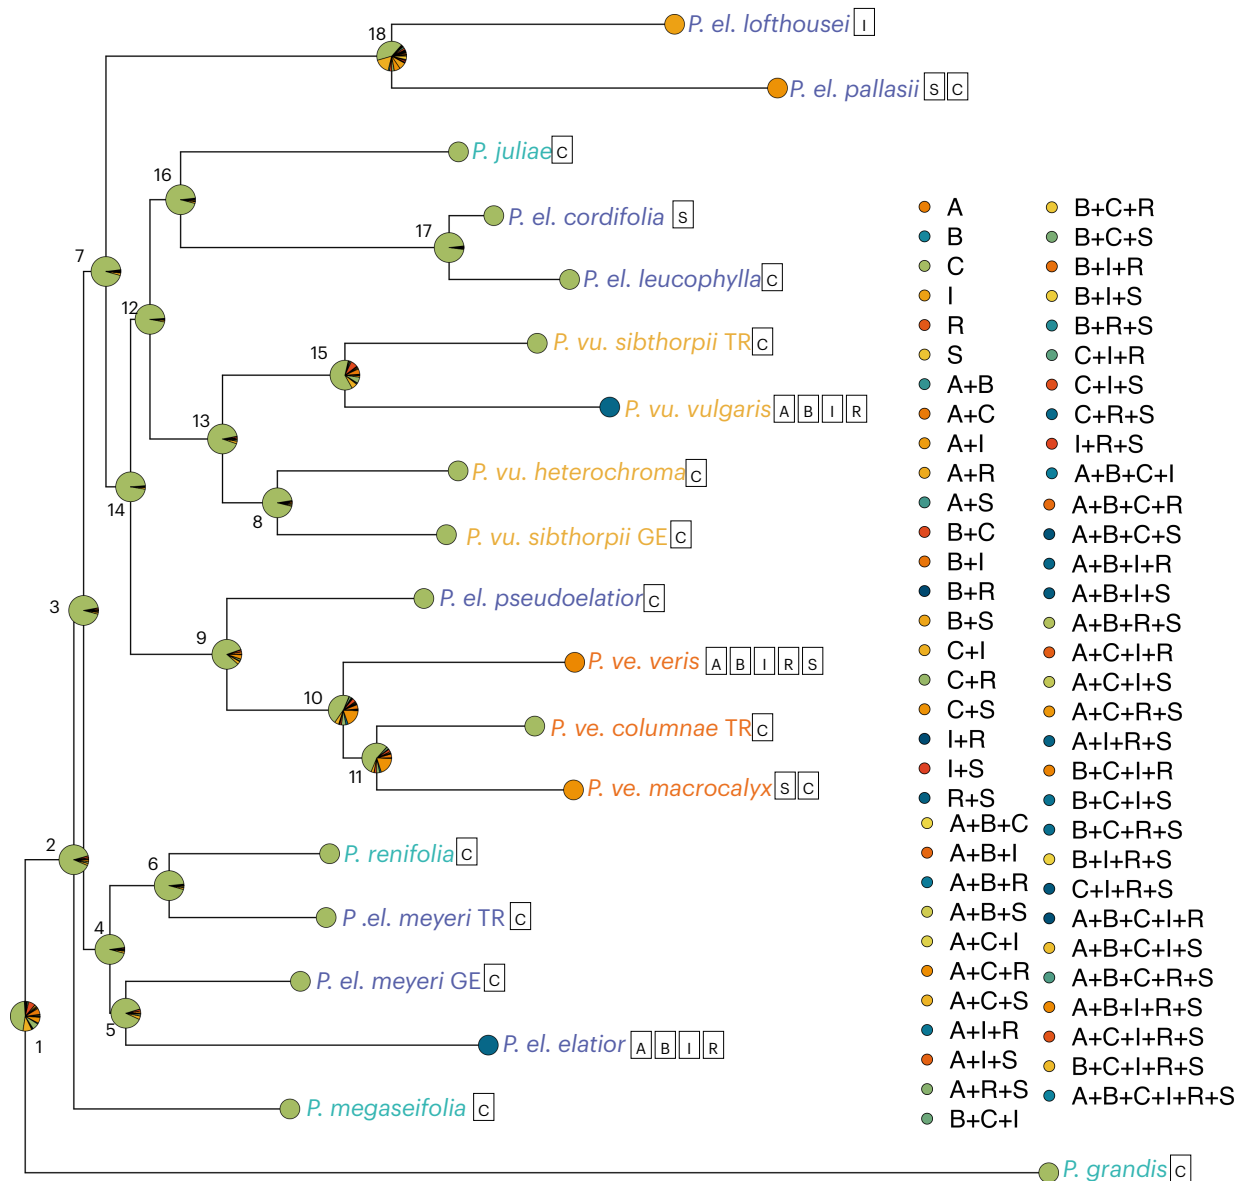

**Fig. S6** Ancestral range estimation under a Bayesian framework with phylogram. Branch lengths in units of molecular divergence. Pie chart at each node corresponds to the probability of each state at that node. All nodes reconstructed the Caucasus (green) as the range with the highest probability. All nodes are numbered to correspond to Supplementary Table S5, which provides the probability of every state at each node. A = Alps, B = British Isles, C = Caucasus, I = Iberian Peninsula, R = Carpathians, S = Siberia/northern Asia.



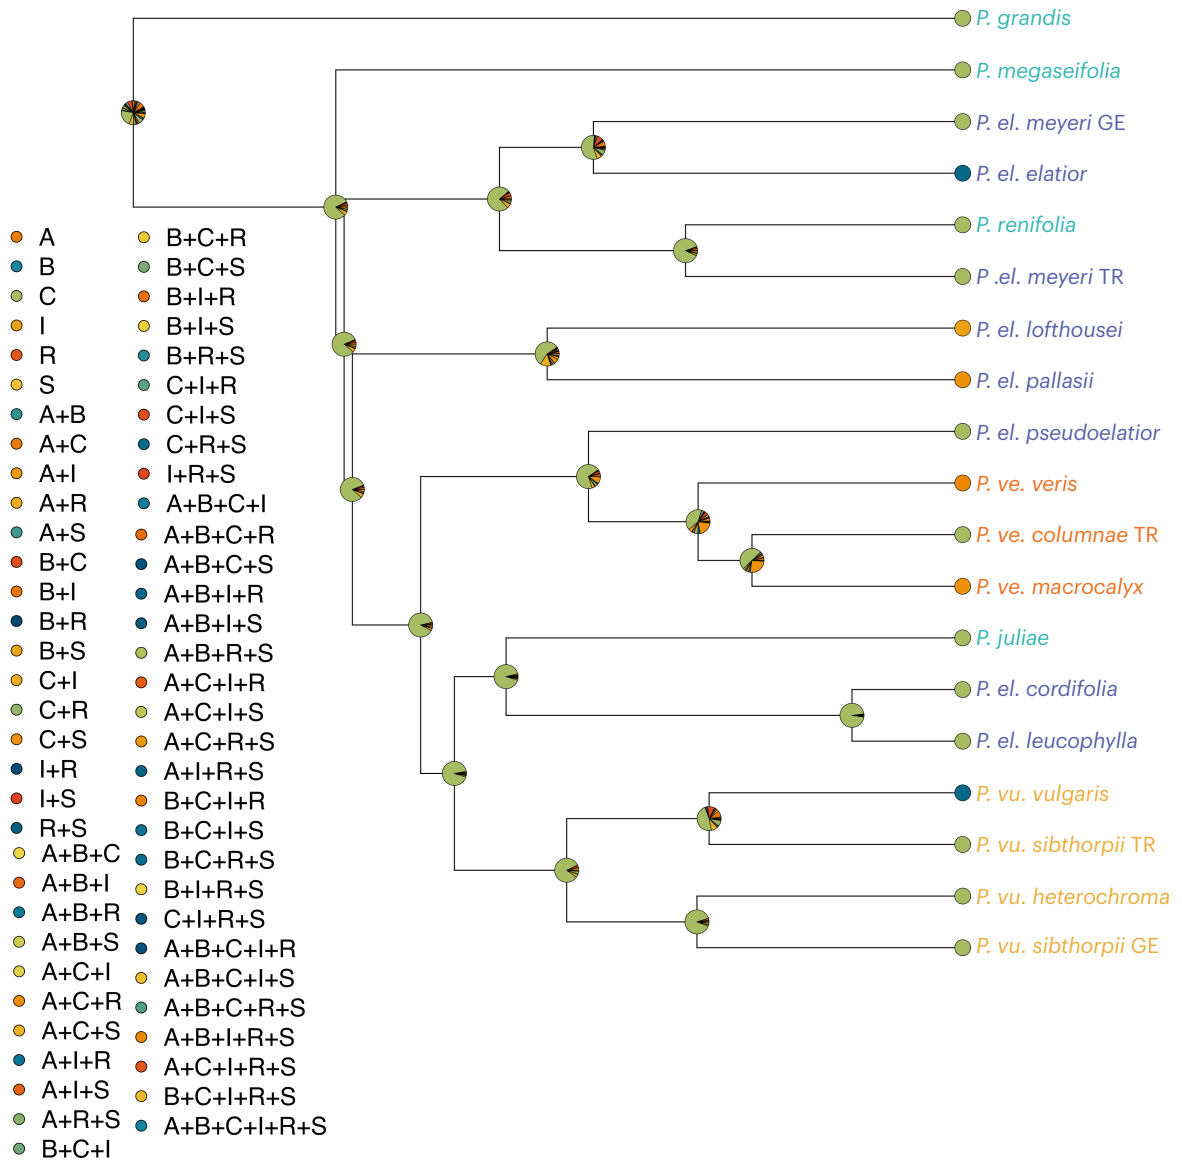

**Fig. S7** Ancestral range estimation under a Bayesian framework with chronogram. Branch lengths in units of time. Pie chart at each node corresponds to the probability of each state at that node. All nodes reconstructed the Caucasus (C) as the range with the highest probability. A = Alps, B = British Isles, C = Caucasus, I = Iberian Peninsula, R = Carpathians, S = Siberia/northern Asia.

TABLE S1. *Primula* specimens used in study. A = Alps, B = British Isles, C = Caucasus, I = Iberian Peninsula, R = Carpathians, S = Siberia/northern Asia.

| Species           | Subspecies         | Collector Number | Specimen Number | Pin or Thrum | Country | Distribution | Date        | Latitude Longitude | Herbarium |
|-------------------|--------------------|------------------|-----------------|--------------|---------|--------------|-------------|--------------------|-----------|
| <i>P. elatior</i> | <i>cordifolia</i>  | RS199            | 01              | pin          | GE      | C            | 9 May 2019  | 41.7080, 43.5072   | TB        |
|                   |                    |                  | 04              | thrum        |         |              |             |                    |           |
| <i>P. elatior</i> | <i>elatior</i>     | BK004            | 01              | thrum        | CH      | A, B, R      | 15 Apr 2019 | 47.3095, 7.71539   | Z         |
|                   |                    |                  | 19              | pin          |         |              |             |                    |           |
| <i>P. elatior</i> | <i>elatior</i>     | BK007            | 01              | pin          | CH      | A, B, R      | 17 Apr 2019 | 46.5129, 7.3908    | Z         |
|                   |                    |                  | 15              | thrum        |         |              |             |                    |           |
| <i>P. elatior</i> | <i>elatior</i>     | EM007            | 09              | pin          | EN      | A, B, R      | 9 Apr 2019  | 52.1367, -0.1290   | Z         |
|                   |                    |                  | 10              | thrum        |         |              |             |                    |           |
| <i>P. elatior</i> | <i>elatior</i>     | EM009            | 10              | pin          | EN      | A, B, R      | 10 Apr 2019 | 52.1591, -0.1155   | Z         |
|                   |                    |                  | 12              | thrum        |         |              |             |                    |           |
| <i>P. elatior</i> | <i>elatior</i>     | JK002            | 10              | pin          | SK      | A, B, R      | 1 May 2019  | 48.7727, 20.1044   | Z         |
|                   |                    |                  | 11              | thrum        |         |              |             |                    |           |
| <i>P. elatior</i> | <i>elatior</i>     | RS175            | 01              | thrum        | CH      | A, B, R      | 19 Mar 2019 | 47.1983, 9.0120    | Z         |
|                   |                    |                  | 20              | pin          |         |              |             |                    |           |
| <i>P. elatior</i> | <i>elatior</i>     | RS184            | 02              | thrum        | SK      | A, B, R      | 24 Apr 2019 | 48.8243, 19.0301   | Z         |
|                   |                    |                  | 14              | pin          |         |              |             |                    |           |
| <i>P. elatior</i> | <i>elatior</i>     | RS187            | 10              | pin          | SK      | A, B, R      | 25 Apr 2019 | 49.1090, 19.1910   | Z         |
|                   |                    |                  | 11              | thrum        |         |              |             |                    |           |
| <i>P. elatior</i> | <i>intricata</i>   | RS179            | 01              | thrum        | ES      | I            | 11 Apr 2019 | 42.7029, 0.7893    | Z         |
|                   |                    |                  | 04              | pin          |         |              |             |                    |           |
| <i>P. elatior</i> | <i>leucophylla</i> | RS193            | 01              | thrum        | GE      | C            | 6 May 2019  | 42.7054, 44.6216   | TB        |
|                   |                    |                  | 02              | pin          |         |              |             |                    |           |
| <i>P. elatior</i> | <i>lofthousei</i>  | RS207            | 02              | pin          | ES      | C            | 15 Jul 2019 | 37.0113, -3.3842   | Z         |
|                   |                    |                  | 03              | thrum        |         |              |             |                    |           |
| <i>P. elatior</i> | <i>meyeri</i>      | RS194            | 03              | thrum        | GE      | C            | 6 May 2019  | 42.6558, 44.6589   | TB        |
|                   |                    |                  | 04              | pin          |         |              |             |                    |           |

TABLE S1. *Primula* specimens used in study. A = Alps, B = British Isles, C = Caucasus, I = Iberian Peninsula, R = Carpathians, S = Siberia/northern Asia.

| Species                | Subspecies            | Collector Number | Specimen Number | Pin or Thrum | Country | Distribution | Date        | Latitude Longitude | Herbarium |
|------------------------|-----------------------|------------------|-----------------|--------------|---------|--------------|-------------|--------------------|-----------|
| <i>P. elatior</i>      | <i>meyeri</i>         | RS204            | 02              | pin          | TR      | C            | 24 Jun 2019 | 40.5225, 40.3863   | ADO       |
|                        |                       |                  | 05              | thrum        |         |              |             |                    |           |
| <i>P. elatior</i>      | <i>pallasii</i>       | FC004            | 02              | pin          | TR      | C, S         | 25 May 2019 | 40.0369, 40.5114   | ADO       |
|                        |                       |                  | 03              | thrum        |         |              |             |                    |           |
| <i>P. elatior</i>      | <i>pallasii</i>       | RS200            | 01              | pin          | GE      | C, S         | 9 May 2019  | 41.6931, 43.5155   | TB        |
|                        |                       |                  | 04              | thrum        |         |              |             |                    |           |
| <i>P. elatior</i>      | <i>pallasii</i>       | RS201            | 02              | pin          | GE      | C, S         | 9 May 2019  | 41.6926, 43.5516   | TB        |
|                        |                       |                  | 03              | thrum        |         |              |             |                    |           |
|                        |                       |                  | 04              | thrum        |         |              |             |                    |           |
| <i>P. elatior</i>      | <i>pseudo-elatior</i> | FC006            | 02              | thrum        | TR      | C            | 26 May 2019 | 40.8797, 41.1278   | ADO       |
|                        |                       |                  | 03              | thrum        |         |              |             |                    |           |
| <i>P. grandis</i>      |                       | GT002            | 03              | Homo-stylous | GE      | C            | 7 Jul 2019  | 43.2061, 43.0814   | TB        |
|                        |                       |                  | 05              | Homo-stylous |         |              |             |                    |           |
| <i>P. grandis</i>      |                       | GT003            | 02              | Homo-stylous | GE      | C            | 7 Jul 2019  | 43.1244, 43.1261   | TB        |
|                        |                       |                  | 03              | Homo-stylous |         |              |             |                    |           |
| <i>P. juliae</i>       |                       | GT005            | 01              | thrum        | GE      | C            | 15 Apr 2019 | 42.0053, 46.3564   | TB        |
|                        |                       |                  | 03              | pin          |         |              |             |                    |           |
| <i>P. megaseifolia</i> |                       | RS171            | 02              | pin          | TR      | C            | 15 Mar 2019 | 41.0792, 40.8888   | ADO       |
|                        |                       |                  | 07              | thrum        |         |              |             |                    |           |
| <i>P. renifolia</i>    |                       |                  | 02              | pin          | RU      | C            | 8 Sep 2011  | 43.2400, 41.4400   | GB        |
|                        |                       |                  | 10              | thrum        |         |              |             |                    |           |
| <i>P. veris</i>        | <i>canescens</i>      | RS177            | 01              | pin          | ES      | I            | 11 Apr 2019 | 42.7068, 0.9105    | Z         |
|                        |                       |                  | 04              | thrum        |         |              |             |                    |           |
| <i>P. veris</i>        | <i>columnae</i>       | BK008            | 01              | thrum        | CH      | A            | 1 May 2019  | 47.4183, 7.7310    | Z         |
|                        |                       |                  | 02              | pin          |         |              |             |                    |           |
| <i>P. veris</i>        | <i>columnae</i>       | FC001            | 02              | thrum        | TR      | C            | 24 May 2019 | 40.6125, 40.2633   | ADO       |
|                        |                       |                  | 04              | pin          |         |              |             |                    |           |

TABLE S1. *Primula* specimens used in study. A = Alps, B = British Isles, C = Caucasus, I = Iberian Peninsula, R = Carpathians, S = Siberia/northern Asia.

| Species            | Subspecies        | Collector Number | Specimen Number | Pin or Thrum | Country | Distribution  | Date     | Latitude Longitude  | Herbarium |
|--------------------|-------------------|------------------|-----------------|--------------|---------|---------------|----------|---------------------|-----------|
| <i>P. veris</i>    | <i>columnnae</i>  | RS178            | 03              | pin          | ES      | I             | 10       | 42.1112,<br>1.8331  | Z         |
|                    |                   |                  | 04              | thrum        |         |               | Apr 2019 |                     |           |
| <i>P. veris</i>    | <i>macrocalyx</i> | FC002            | 01              | pin          | TR      | C             | 25       | 41.0439,<br>42.2611 | ADO       |
|                    |                   |                  | 02              | thrum        |         |               | May 2019 |                     |           |
| <i>P. veris</i>    | <i>macrocalyx</i> | RS190            | 01              | pin          | GE      | C             | 5        | 41.6433,<br>44.6950 | TB        |
|                    |                   |                  | 04              | thrum        |         |               | May 2019 |                     |           |
| <i>P. veris</i>    | <i>macrocalyx</i> | RS195            | 01              | pin          | GE      | C             | 8        | 41.8725,<br>44.7698 | TB        |
|                    |                   |                  | 02              | pin          |         |               | May 2019 |                     |           |
| <i>P. veris</i>    | <i>veris</i>      | BK003            | 10              | pin          | CH      | A, B,<br>R, S | 10       | 46.4433,<br>6.9147  | Z         |
|                    |                   |                  | 11              | thrum        |         |               | Apr 2019 |                     |           |
| <i>P. veris</i>    | <i>veris</i>      | BK006            | 01              | thrum        | CH      | A, B,<br>R, S | 15       | 47.3095,<br>7.7154  | Z         |
|                    |                   |                  | 20              | pin          |         |               | Apr 2019 |                     |           |
| <i>P. veris</i>    | <i>veris</i>      | EM002            | 06              | thrum        | EN      | A, B,<br>R, S | 5        | 51.3700,<br>-2.3377 | Z         |
|                    |                   |                  | 18              | pin          |         |               | Apr 2019 |                     |           |
| <i>P. veris</i>    | <i>veris</i>      | EM004            | 01              | thrum        | EN      | A, B,<br>R, S | 6        | 51.3536,<br>-2.3286 | Z         |
|                    |                   |                  | 20              | pin          |         |               | Apr 2019 |                     |           |
| <i>P. veris</i>    | <i>veris</i>      | JK001            | 10              | pin          | SK      | A, B,<br>R, S | 1        | 48.7727,<br>20.1044 | Z         |
|                    |                   |                  | 11              | thrum        |         |               | May 2019 |                     |           |
| <i>P. veris</i>    | <i>veris</i>      | RS181            | 01              | thrum        | SK      | A, B,<br>R, S | 24       | 48.7704,<br>19.0547 | Z         |
|                    |                   |                  | 20              | pin          |         |               | Apr 2019 |                     |           |
| <i>P. veris</i>    | <i>veris</i>      | RS186            | 04              | pin          | SK      | A, B,<br>R, S | 25       | 49.1090,<br>19.1910 | Z         |
|                    |                   |                  | 18              | thrum        |         |               | Apr 2019 |                     |           |
| <i>P. veris</i>    | <i>veris</i>      | RS189            | 01              | thrum        | SK      | A, B,<br>R, S | 25       | 48.8294,<br>19.3067 | Z         |
|                    |                   |                  | 16              | pin          |         |               | Apr 2019 |                     |           |
| <i>P. vulgaris</i> | <i>balearica</i>  | RS202            | 01              | thrum        | ES      | I             |          | 39.6346,            | Z         |

TABLE S1. *Primula* specimens used in study. A = Alps, B = British Isles, C = Caucasus, I = Iberian Peninsula, R = Carpathians, S = Siberia/northern Asia.

| Species            | Subspecies          | Collector Number | Specimen Number | Pin or Thrum | Country | Distribution | Date        | Latitude Longitude | Herbarium |
|--------------------|---------------------|------------------|-----------------|--------------|---------|--------------|-------------|--------------------|-----------|
|                    |                     |                  | 04              | pin          |         |              | 23 May 2019 | 2.4862             |           |
| <i>P. vulgaris</i> | <i>heterochroma</i> | PY001            | 03              | thrum        | IR      | C            | 12 Apr 2019 | 37.1250, 49.8425   | Z         |
| <i>P. vulgaris</i> | <i>sibthorpii</i>   | RS170            | 07              | thrum        | TR      | C            | 14 Mar 2019 | 40.9381, 39.7507   | ADO       |
| <i>P. vulgaris</i> | <i>sibthorpii</i>   | RS172            | 17              | pin          |         |              |             |                    |           |
| <i>P. vulgaris</i> | <i>sibthorpii</i>   | RS172            | 01              | thrum        | TR      | C            | 16 Mar 2019 | 41.0775, 40.7067   | ADO       |
| <i>P. vulgaris</i> | <i>sibthorpii</i>   | RS172            | 03              | pin          |         |              |             |                    |           |
| <i>P. vulgaris</i> | <i>sibthorpii</i>   | RS196            | 01              | pin          | GE      | C            | 8 May 2019  | 41.8111, 43.5196   | TB        |
| <i>P. vulgaris</i> | <i>sibthorpii</i>   | RS196            | 04              | thrum        |         |              |             |                    |           |
| <i>P. vulgaris</i> | <i>vulgaris</i>     | BK001            | 10              | pin          | CH      | A, B, R      | 10 Apr 2019 | 46.4433, 6.9147    | Z         |
| <i>P. vulgaris</i> | <i>vulgaris</i>     | BK001            | 11              | thrum        |         |              |             |                    |           |
| <i>P. vulgaris</i> | <i>vulgaris</i>     | EM001            | 02              | thrum        | EN      | A, B, R      | 29 Mar 2019 | 51.0276, -2.6296   | Z         |
| <i>P. vulgaris</i> | <i>vulgaris</i>     | EM001            | 11              | pin          |         |              |             |                    |           |
| <i>P. vulgaris</i> | <i>vulgaris</i>     | EM003            | 01              | thrum        | EN      | A, B, R      | 6 Apr 2019  | 51.3536, -2.3286   | Z         |
| <i>P. vulgaris</i> | <i>vulgaris</i>     | EM003            | 20              | pin          |         |              |             |                    |           |
| <i>P. vulgaris</i> | <i>vulgaris</i>     | EM006            | 10              | pin          | EN      | A, B, R      | 9 Apr 2019  | 52.1367, -0.1290   | Z         |
| <i>P. vulgaris</i> | <i>vulgaris</i>     | EM006            | 11              | thrum        |         |              |             |                    |           |
| <i>P. vulgaris</i> | <i>vulgaris</i>     | RS174            | 02              | thrum        | CH      | A, B, R      | 19 Mar 2019 | 47.1983, 9.0120    | Z         |
| <i>P. vulgaris</i> | <i>vulgaris</i>     | RS174            | 19              | pin          |         |              |             |                    |           |
| <i>P. vulgaris</i> | <i>vulgaris</i>     | RS180            | 01              | thrum        | SK      | A, B, R      | 24 Apr 2019 | 48.7704, 19.0547   | Z         |
| <i>P. vulgaris</i> | <i>vulgaris</i>     | RS180            | 09              | pin          |         |              |             |                    |           |
| <i>P. vulgaris</i> | <i>vulgaris</i>     | RS183            | 01              | thrum        | SK      | A, B, R      | 24 Apr 2019 | 48.8243, 19.0301   | Z         |
| <i>P. vulgaris</i> | <i>vulgaris</i>     | RS183            | 10              | pin          |         |              |             |                    |           |

TABLE S1. *Primula* specimens used in study. A = Alps, B = British Isles, C = Caucasus, I = Iberian Peninsula, R = Carpathians, S = Siberia/northern Asia.

| Species                                        | Subspecies | Collector Number | Specimen Number | Pin or Thrum | Country | Distribution | Date        | Latitude Longitude | Herbarium |
|------------------------------------------------|------------|------------------|-----------------|--------------|---------|--------------|-------------|--------------------|-----------|
| <i>P. siamensis</i>                            |            | 375              |                 |              | TH      |              | 23 Jun 2002 |                    | Z         |
| <i>P. souliei</i>                              |            | 386              |                 |              | CN      |              | 1 May 2002  |                    | Z         |
| <i>P. verticillata</i>                         |            | 392              |                 |              | YE      |              | 1 Apr 1995  |                    | Z         |
| <i>P. bouveana</i>                             |            | 340              |                 |              | EG      |              | 1 Sep 2011  |                    | SCU       |
| <i>Dionysia revoluta</i> ssp. <i>canescens</i> |            | 149              | 07              |              | IR      |              | 2 Apr 2001  |                    | Z         |
| <i>P. halleri</i>                              |            | 120703           | 01              |              | AT      |              | 12 Jul 2003 |                    | Z         |
| <i>P. mistassinica</i>                         |            | 130904           | 01              |              | CA      |              | 13 Sep 2004 |                    | Z         |
| <i>P. nutans</i>                               |            | 30705            | 02              |              | NO      |              | 3 Jul 2005  |                    | Z         |



| Branch     | branch_descendants                                      | Gra   | Meg   | ElaEla<br>t | ElaMe<br>yeGE | ElaMe<br>yeTR | Ren   | ElaPal<br>l | ElaLo<br>ft | ElaPs<br>eu | VerVe<br>ri | VerM<br>acr | VerCo<br>luTR | Jul   | ElaCo<br>rd | ElaLe<br>uc | VulSi<br>btGE | VulHe<br>te | VulVul<br>g | VulSi<br>btTR |
|------------|---------------------------------------------------------|-------|-------|-------------|---------------|---------------|-------|-------------|-------------|-------------|-------------|-------------|---------------|-------|-------------|-------------|---------------|-------------|-------------|---------------|
| <b>B26</b> | Jul                                                     | 0     | 0     | 0           | 0             | 0             | 0     | 0.015       | 0.015       | 0           | 0           | 0           | 0             | nan   | nan         | nan         | 0             | 0           | 0           | 0             |
| <b>B27</b> | Jul,ElaCord,ElaLeuc                                     | 0.018 | 0.008 | 0           | 0.010         | 0.011         | 0.010 | 0.006       | 0.005       | 0           | 0           | 0           | 0             | nan   | nan         | nan         | nan           | nan         | nan         | nan           |
| <b>B28</b> | ElaCord                                                 | 0.002 | 0     | 0.002       | 0             | 0             | 0.002 | 0           | 0           | 0           | 0.006       | 0.008       | 0.005         | 0     | nan         | nan         | 0             | 0           | 0.007       | 0.003         |
| <b>B29</b> | ElaCord,ElaLeuc                                         | 0     | 0.018 | 0.020       | 0.047         | 0.029         | 0.026 | 0           | 0           | 0.063       | 0.046       | 0.066       | 0.047         | nan   | nan         | nan         | 0.041         | 0.042       | 0.044       | 0.051         |
| <b>B30</b> | ElaLeuc                                                 | 0     | 0     | 0           | 0             | 0             | 0     | 0           | 0           | 0           | 0           | 0           | 0             | 0.003 | nan         | nan         | 0             | 0           | 0           | 0             |
| <b>B31</b> | VulSibtGE,VulHete,VulVulg,VulSibtTR,Jul,ElaCord,ElaLeuc | 0.056 | 0.100 | 0.104       | 0.078         | 0.062         | 0.068 | 0.071       | 0.070       | nan         | nan         | nan         | nan           | nan   | nan         | nan         | nan           | nan         | nan         | nan           |
| <b>B32</b> | VulSibtGE                                               | 0     | 0     | 0.006       | 0.014         | 0.007         | 0.007 | 0           | 0           | 0.026       | 0.018       | 0.019       | 0.016         | 0.007 | 0.007       | 0.006       | nan           | nan         | 0.038       | 0.066         |
| <b>B33</b> | VulSibtGE,VulHete                                       | 0.028 | 0.042 | 0           | 0.029         | 0.033         | 0.028 | 0.024       | 0.018       | 0.018       | 0.004       | 0.018       | 0.010         | 0.018 | 0.008       | 0.010       | nan           | nan         | nan         | nan           |
| <b>B34</b> | VulHete                                                 | 0     | 0     | 0           | 0             | 0             | 0     | 0.010       | 0.009       | 0           | 0           | 0           | 0             | 0     | 0           | 0           | nan           | nan         | 0           | 0             |
| <b>B35</b> | VulSibtGE,VulHete,VulVulg,VulSibtTR                     | 0     | 0     | 0           | 0             | 0             | 0     | 0           | 0           | 0           | 0           | 0           | 0             | nan   | nan         | nan         | nan           | nan         | nan         | nan           |
| <b>B36</b> | VulVulg                                                 | 0     | 0     | 0           | 0             | 0             | 0     | 0           | 0           | 0           | 0           | 0           | 0             | 0     | 0           | 0           | 0             | 0           | nan         | nan           |
| <b>B37</b> | VulVulg,VulSibtTR                                       | 0     | 0     | 0           | 0             | 0             | 0     | 0           | 0           | 0           | 0           | 0           | 0             | 0     | 0           | 0           | nan           | nan         | nan         | nan           |
| <b>B38</b> | VulSibtTR                                               | 0.021 | 0.038 | 0           | 0.028         | 0.028         | 0.026 | 0.020       | 0.013       | 0.030       | 0           | 0.016       | 0.017         | 0.032 | 0.026       | 0.027       | 0.115         | 0.100       | nan         | nan           |



SUPPLEMENTARY TABLE S3. Results from D<sub>FOIL</sub> analysis for *Primula* sect. *Primula*.

| (P1,P2),(P3,P4),O                                                                     | total   | dtotal | T1 2  | T3 4  | T12 34 | DFO_left | DFO_r ight | DFO_t otal | DFO_ stat | DFO_c hisq | DFO_P value | DIL_ left | DIL_r ight | DIL_t otal | DIL_ stat | DIL_c hisq | DIL_P value | DFL_ left | DFL_r ight | DFL_t otal | DFL_ stat | DFL_c hisq | DFL_P value | DOL_ left | DOL_r ight | DOL_t otal | DOL_ stat | DOL_c hisq | DOL_P value | introgre sion |
|---------------------------------------------------------------------------------------|---------|--------|-------|-------|--------|----------|------------|------------|-----------|------------|-------------|-----------|------------|------------|-----------|------------|-------------|-----------|------------|------------|-----------|------------|-------------|-----------|------------|------------|-----------|------------|-------------|---------------|
| (P. megaseifolia, P. megaseifolia), (P. renifolia, P. el. meyeri TR)                  | 5056801 | 255863 | 0.005 | 0.012 | 0.023  | 88109    | 93171      | 181280     | -0.028    | 141.350    | 0.0         | 8827      | 93053      | 181280     | -0.027    | 128.477    | 0.0         | 44898     | 44341      | 89239      | 0.006     | 3.477      | 0.062       | 45016     | 44223      | 89239      | 0.009     | 7.047      | 0.008       | 14            |
| (P. megaseifolia, P. megaseifolia), (P. el. elatior, P. el. meyeri GE)                | 4960390 | 344749 | 0.005 | 0.021 | 0.025  | 100419   | 173110     | 273529     | -0.266    | 19317.811  | 0.0         | 100409    | 173120     | 273529     | -0.266    | 19328.442  | 0.0         | 44112     | 43410      | 87522      | 0.008     | 5.631      | 0.018       | 44102     | 43420      | 87522      | 0.008     | 5.314      | 0.021       | 124           |
| (P. el. pseudoelatior, P. el. pseudoelatior), (P. ve. columnae TR, P. ve. macrocalyx) | 5129942 | 258490 | 0.005 | 0.011 | 0.020  | 101660   | 80012      | 181672     | 0.119     | 2579.571   | 0.0         | 101166    | 80506      | 181672     | 0.114     | 2349.485   | 0.0         | 51779     | 50125      | 101904     | 0.016     | 26.846     | 0.000       | 51285     | 50619      | 101904     | 0.007     | 4.353      | 0.037       | 13            |
| (P. el. pseudoelatior, P. el. pseudoelatior), (P. ve. veris, P. ve. columnae TR)      | 5131224 | 283384 | 0.005 | 0.013 | 0.020  | 89127    | 117540     | 206667     | -0.137    | 3906.277   | 0.0         | 89763     | 116904     | 206667     | -0.131    | 3564.352   | 0.0         | 51223     | 50814      | 102037     | 0.004     | 1.639      | 0.200       | 51859     | 50178      | 102037     | 0.016     | 27.693     | 0.000       | 14            |
| (P. el. pseudoelatior, P. el. pseudoelatior), (P. ve. veris, P. ve. macrocalyx))      | 5129465 | 288249 | 0.005 | 0.014 | 0.022  | 100848   | 107343     | 208191     | -0.031    | 202.627    | 0.0         | 100923    | 107268     | 208191     | -0.030    | 193.375    | 0.0         | 51212     | 50709      | 101921     | 0.005     | 2.482      | 0.115       | 51287     | 50634      | 101921     | 0.006     | 4.184      | 0.041       | 124           |

Supplementary Table S4. D-statistics and F4-ratios from Dsuite for all species trios in *Primula* sect. *Primula*.

| <b>P1</b>         | <b>P2</b>            | <b>P3</b>            | <b>Dstatistic</b> | <b>Z-score</b> | <b>p-value</b> | <b>f4-ratio</b> | <b>BBA</b> | <b>ABBA</b> | <b>BABA</b> |
|-------------------|----------------------|----------------------|-------------------|----------------|----------------|-----------------|------------|-------------|-------------|
| P. el. cordifolia | P. el. elatior       | P. el. pallasii      | 0.078             | 11.204         | 0.000          | 0.030           | 88716      | 72521       | 62082       |
| P. el. cordifolia | P. el. elatior       | P. grandis           | 0.125             | 28.762         | 0.000          | 0.051           | 204301     | 66965       | 52079       |
| P. el. cordifolia | P. el. leucophylla   | P. juliae            | 0.017             | 3.575          | 0.000          | 0.003           | 276456     | 19880       | 19207       |
| P. el. cordifolia | P. el. meyeri        | P. grandis           | 0.185             | 44.943         | 0.000          | 0.072           | 205200     | 66521       | 45771       |
| P. el. cordifolia | P. el. meyeri        | P. grandis           | 0.177             | 37.115         | 0.000          | 0.072           | 198640     | 68585       | 47935       |
| P. el. cordifolia | P. juliae            | P. el. lofthousei    | 0.050             | 9.248          | 0.000          | 0.015           | 114874     | 53812       | 48665       |
| P. el. cordifolia | P. juliae            | P. el. pallasii      | 0.044             | 7.999          | 0.000          | 0.014           | 114123     | 55104       | 50433       |
| P. el. cordifolia | P. megaseifolia      | P. el. elatior       | 0.035             | 6.160          | 0.000          | 0.021           | 57485      | 70555       | 65836       |
| P. el. cordifolia | P. megaseifolia      | P. el. lofthousei    | 0.007             | 1.161          | 0.123          | 0.003           | 83197      | 62780       | 61872       |
| P. el. cordifolia | P. megaseifolia      | P. el. meyeri        | 0.024             | 4.088          | 0.000          | 0.021           | 50440      | 69906       | 66610       |
| P. el. cordifolia | P. megaseifolia      | P. el. pallasii      | 0.009             | 1.429          | 0.077          | 0.003           | 82062      | 65054       | 63921       |
| P. el. cordifolia | P. megaseifolia      | P. grandis           | 0.141             | 29.475         | 0.000          | 0.059           | 194457     | 68438       | 51537       |
| P. el. cordifolia | P. megaseifolia      | P. renifolia         | 0.081             | 13.752         | 0.000          | 0.055           | 52222      | 72693       | 61799       |
| P. el. cordifolia | P. renifolia         | P. grandis           | 0.199             | 43.726         | 0.000          | 0.080           | 199348     | 69873       | 46685       |
| P. el. cordifolia | P. ve. veris         | P. el. pseudoelatior | 0.088             | 7.775          | 0.000          | 0.087           | 38725      | 101052      | 84781       |
| P. el. cordifolia | P. vu. heterochroma  | P. el. lofthousei    | 0.031             | 5.625          | 0.000          | 0.009           | 110526     | 56244       | 52883       |
| P. el. cordifolia | P. vu. heterochroma  | P. el. pallasii      | 0.031             | 5.527          | 0.000          | 0.010           | 109617     | 58177       | 54675       |
| P. el. cordifolia | P. vu. sibthorpii GE | P. el. lofthousei    | 0.000             | 0.095          | 0.462          | 0.000           | 112388     | 53059       | 53007       |
| P. el. cordifolia | P. vu. sibthorpii GE | P. el. pallasii      | 0.001             | 0.277          | 0.391          | 0.000           | 111482     | 54963       | 54803       |
| P. el. elatior    | P. el. cordifolia    | P. ve. veris         | 0.131             | 21.341         | 0.000          | 0.070           | 105826     | 69111       | 53101       |
| P. el. elatior    | P. el. leucophylla   | P. ve. veris         | 0.119             | 19.894         | 0.000          | 0.064           | 106156     | 68452       | 53892       |
| P. el. elatior    | P. el. meyeri        | P. el. cordifolia    | 0.079             | 16.635         | 0.000          | 0.025           | 99448      | 53830       | 45918       |
| P. el. elatior    | P. el. meyeri        | P. el. leucophylla   | 0.082             | 16.762         | 0.000          | 0.025           | 99281      | 54006       | 45795       |
| P. el. elatior    | P. el. meyeri        | P. el. leucophylla   | 0.001             | 0.218          | 0.414          | 0.000           | 88704      | 53106       | 52988       |
| P. el. elatior    | P. el. meyeri        | P. el. meyeri        | 0.062             | 11.227         | 0.000          | 0.048           | 69508      | 58775       | 51909       |
| P. el. elatior    | P. el. meyeri        | P. el. pseudoelatior | 0.095             | 18.346         | 0.000          | 0.044           | 111133     | 53342       | 44079       |
| P. el. elatior    | P. el. meyeri        | P. el. pseudoelatior | 0.022             | 4.843          | 0.000          | 0.011           | 99560      | 53116       | 50830       |
| P. el. elatior    | P. el. meyeri        | P. grandis           | 0.065             | 17.654         | 0.000          | 0.022           | 235666     | 50011       | 43927       |
| P. el. elatior    | P. el. meyeri        | P. grandis           | 0.062             | 16.237         | 0.000          | 0.023           | 220714     | 53804       | 47528       |
| P. el. elatior    | P. el. meyeri        | P. juliae            | 0.051             | 11.128         | 0.000          | 0.017           | 104648     | 51641       | 46645       |
| P. el. elatior    | P. el. meyeri        | P. megaseifolia      | 0.068             | 16.256         | 0.000          | 0.040           | 94496      | 52387       | 45705       |
| P. el. elatior    | P. el. meyeri        | P. megaseifolia      | 0.058             | 11.347         | 0.000          | 0.037           | 80899      | 56159       | 49953       |
| P. el. elatior    | P. el. meyeri        | P. ve. columnae      | 0.094             | 17.908         | 0.000          | 0.035           | 129044     | 51672       | 42755       |
| P. el. elatior    | P. el. meyeri        | P. ve. columnae      | 0.033             | 6.953          | 0.000          | 0.013           | 116394     | 52317       | 48936       |
| P. el. elatior    | P. el. meyeri        | P. ve. macrocalyx    | 0.096             | 19.426         | 0.000          | 0.043           | 129869     | 51948       | 42845       |
| P. el. elatior    | P. el. meyeri        | P. ve. macrocalyx    | 0.031             | 6.567          | 0.000          | 0.015           | 117392     | 52404       | 49217       |
| P. el. elatior    | P. el. meyeri        | P. ve. veris         | 0.077             | 14.479         | 0.000          | 0.030           | 149655     | 48808       | 41861       |
| P. el. elatior    | P. el. meyeri        | P. ve. veris         | 0.032             | 6.287          | 0.000          | 0.014           | 136084     | 50712       | 47529       |
| P. el. elatior    | P. el. meyeri        | P. vu. heterochroma  | 0.040             | 8.882          | 0.000          | 0.018           | 107247     | 52443       | 48438       |
| P. el. elatior    | P. el. meyeri        | P. vu. sibthorpii GE | 0.049             | 9.500          | 0.000          | 0.022           | 105422     | 53057       | 48100       |
| P. el. elatior    | P. el. meyeri        | P. vu. sibthorpii TR | 0.010             | 2.315          | 0.010          | 0.004           | 110420     | 52584       | 51505       |
| P. el. elatior    | P. el. pseudoelatior | P. el. cordifolia    | 0.069             | 7.735          | 0.000          | 0.033           | 55772      | 78950       | 68714       |

| <b>P1</b>          | <b>P2</b>            | <b>P3</b>            | <b>Dstatistic</b> | <b>Z-score</b> | <b>p-value</b> | <b>f4-ratio</b> | <b>BBAA</b> | <b>ABBA</b> | <b>BABA</b> |
|--------------------|----------------------|----------------------|-------------------|----------------|----------------|-----------------|-------------|-------------|-------------|
| P. el. elatior     | P. el. pseudoelatior | P. el. leucophylla   | 0.069             | 7.806          | 0.000          | 0.031           | 56293       | 78965       | 68814       |
| P. el. elatior     | P. el. pseudoelatior | P. juliae            | 0.018             | 2.182          | 0.015          | 0.009           | 62090       | 72464       | 69935       |
| P. el. elatior     | P. el. pseudoelatior | P. vu. heterochroma  | 0.027             | 3.439          | 0.000          | 0.018           | 62798       | 75156       | 71254       |
| P. el. elatior     | P. el. pseudoelatior | P. vu. sibthorpii GE | 0.052             | 6.211          | 0.000          | 0.034           | 60438       | 77830       | 70140       |
| P. el. elatior     | P. el. pseudoelatior | P. vu. sibthorpii TR | 0.016             | 2.093          | 0.018          | 0.010           | 65042       | 76296       | 73839       |
| P. el. elatior     | P. juliae            | P. ve. columnae      | 0.051             | 8.818          | 0.000          | 0.026           | 87195       | 67667       | 61058       |
| P. el. elatior     | P. juliae            | P. ve. macrocalyx    | 0.047             | 7.953          | 0.000          | 0.029           | 88241       | 67549       | 61540       |
| P. el. elatior     | P. juliae            | P. ve. veris         | 0.034             | 5.516          | 0.000          | 0.019           | 106350      | 63778       | 59534       |
| P. el. elatior     | P. megaseifolia      | P. grandis           | 0.020             | 5.167          | 0.000          | 0.008           | 199486      | 59384       | 57052       |
| P. el. elatior     | P. renifolia         | P. el. cordifolia    | 0.013             | 2.504          | 0.006          | 0.004           | 92931       | 52153       | 50863       |
| P. el. elatior     | P. renifolia         | P. el. leucophylla   | 0.013             | 2.514          | 0.006          | 0.004           | 93051       | 52189       | 50857       |
| P. el. elatior     | P. renifolia         | P. el. pseudoelatior | 0.020             | 3.828          | 0.000          | 0.010           | 104584      | 51274       | 49253       |
| P. el. elatior     | P. renifolia         | P. grandis           | 0.087             | 21.426         | 0.000          | 0.031           | 225240      | 53786       | 45143       |
| P. el. elatior     | P. renifolia         | P. juliae            | 0.003             | 0.612          | 0.270          | 0.001           | 97490       | 51281       | 50956       |
| P. el. elatior     | P. renifolia         | P. megaseifolia      | 0.075             | 14.940         | 0.000          | 0.046           | 84988       | 55371       | 47681       |
| P. el. elatior     | P. renifolia         | P. ve. columnae      | 0.015             | 2.565          | 0.005          | 0.006           | 122287      | 49305       | 47875       |
| P. el. elatior     | P. renifolia         | P. ve. macrocalyx    | 0.014             | 2.574          | 0.005          | 0.007           | 123249      | 49498       | 48093       |
| P. el. elatior     | P. ve. veris         | P. el. pseudoelatior | 0.199             | 20.889         | 0.000          | 0.184           | 39144       | 118403      | 79134       |
| P. el. elatior     | P. vu. heterochroma  | P. ve. columnae      | 0.064             | 11.062         | 0.000          | 0.032           | 89120       | 70095       | 61712       |
| P. el. elatior     | P. vu. heterochroma  | P. ve. macrocalyx    | 0.057             | 9.919          | 0.000          | 0.035           | 90292       | 69767       | 62292       |
| P. el. elatior     | P. vu. heterochroma  | P. ve. veris         | 0.047             | 7.567          | 0.000          | 0.026           | 108947      | 66151       | 60227       |
| P. el. elatior     | P. vu. sibthorpii GE | P. ve. columnae      | 0.094             | 15.926         | 0.000          | 0.048           | 88145       | 71998       | 59656       |
| P. el. elatior     | P. vu. sibthorpii GE | P. ve. macrocalyx    | 0.087             | 14.766         | 0.000          | 0.054           | 89225       | 71571       | 60157       |
| P. el. elatior     | P. vu. sibthorpii GE | P. ve. veris         | 0.079             | 12.784         | 0.000          | 0.044           | 107690      | 67971       | 58030       |
| P. el. elatior     | P. vu. sibthorpii TR | P. ve. columnae      | 0.055             | 9.034          | 0.000          | 0.029           | 92091       | 71634       | 64101       |
| P. el. elatior     | P. vu. sibthorpii TR | P. ve. macrocalyx    | 0.040             | 6.690          | 0.000          | 0.025           | 93482       | 70243       | 64892       |
| P. el. elatior     | P. vu. sibthorpii TR | P. ve. veris         | 0.032             | 5.154          | 0.000          | 0.018           | 112319      | 66877       | 62764       |
| P. el. elatior     | P. vu. vulgaris      | P. ve. columnae      | 0.022             | 3.233          | 0.001          | 0.012           | 95900       | 71100       | 68030       |
| P. el. elatior     | P. vu. vulgaris      | P. ve. macrocalyx    | 0.014             | 2.079          | 0.019          | 0.009           | 97060       | 70540       | 68606       |
| P. el. elatior     | P. vu. vulgaris      | P. ve. veris         | 0.032             | 4.497          | 0.000          | 0.019           | 114955      | 69772       | 65470       |
| P. el. leucophylla | P. el. cordifolia    | P. el. elatior       | 0.010             | 2.577          | 0.005          | 0.002           | 319960      | 18172       | 17796       |
| P. el. leucophylla | P. el. cordifolia    | P. el. lothousei     | 0.006             | 1.321          | 0.093          | 0.001           | 340056      | 16829       | 16627       |
| P. el. leucophylla | P. el. cordifolia    | P. el. meyeri        | 0.002             | 0.336          | 0.368          | 0.000           | 309797      | 18135       | 18080       |
| P. el. leucophylla | P. el. cordifolia    | P. el. meyeri        | 0.004             | 1.038          | 0.150          | 0.001           | 314515      | 17638       | 17485       |
| P. el. leucophylla | P. el. cordifolia    | P. el. pallasii      | 0.005             | 1.103          | 0.135          | 0.000           | 342003      | 17483       | 17313       |
| P. el. leucophylla | P. el. cordifolia    | P. el. pseudoelatior | 0.009             | 1.917          | 0.028          | 0.002           | 307918      | 18789       | 18464       |
| P. el. leucophylla | P. el. cordifolia    | P. grandis           | 0.020             | 5.487          | 0.000          | 0.002           | 466203      | 16684       | 16028       |
| P. el. leucophylla | P. el. cordifolia    | P. megaseifolia      | 0.005             | 1.256          | 0.104          | 0.001           | 323772      | 17321       | 17144       |
| P. el. leucophylla | P. el. cordifolia    | P. renifolia         | 0.011             | 2.415          | 0.008          | 0.002           | 315369      | 17906       | 17526       |
| P. el. leucophylla | P. el. cordifolia    | P. ve. columnae      | 0.032             | 4.359          | 0.000          | 0.005           | 331544      | 19006       | 17830       |
| P. el. leucophylla | P. el. cordifolia    | P. ve. macrocalyx    | 0.040             | 4.736          | 0.000          | 0.008           | 332293      | 19833       | 18315       |
| P. el. leucophylla | P. el. cordifolia    | P. ve. veris         | 0.035             | 5.094          | 0.000          | 0.006           | 356073      | 17563       | 16376       |
| P. el. leucophylla | P. el. cordifolia    | P. vu. heterochroma  | 0.003             | 0.844          | 0.199          | 0.001           | 290480      | 19355       | 19224       |

| <b>P1</b>          | <b>P2</b>            | <b>P3</b>            | <b>Dstatistic</b> | <b>Z-score</b> | <b>p-value</b> | <b>f4-ratio</b> | <b>BBAA</b> | <b>ABBA</b> | <b>BABA</b> |
|--------------------|----------------------|----------------------|-------------------|----------------|----------------|-----------------|-------------|-------------|-------------|
| P. el. leucophylla | P. el. cordifolia    | P. vu. sibthorpii GE | 0.003             | 0.766          | 0.222          | 0.001           | 287777      | 19352       | 19230       |
| P. el. leucophylla | P. el. cordifolia    | P. vu. sibthorpii TR | 0.017             | 3.685          | 0.000          | 0.003           | 290325      | 20245       | 19565       |
| P. el. leucophylla | P. el. cordifolia    | P. vu. vulgaris      | 0.043             | 9.899          | 0.000          | 0.007           | 298390      | 20591       | 18906       |
| P. el. leucophylla | P. el. elatior       | P. el. pallasii      | 0.080             | 11.711         | 0.000          | 0.032           | 88903       | 73095       | 62247       |
| P. el. leucophylla | P. el. elatior       | P. grandis           | 0.130             | 30.128         | 0.000          | 0.054           | 202809      | 67277       | 51791       |
| P. el. leucophylla | P. el. meyeri        | P. el. lofthousei    | 0.003             | 0.532          | 0.297          | 0.001           | 89317       | 60136       | 59751       |
| P. el. leucophylla | P. el. meyeri        | P. el. pallasii      | 0.001             | 0.194          | 0.423          | 0.000           | 88245       | 61931       | 61788       |
| P. el. leucophylla | P. el. meyeri        | P. grandis           | 0.190             | 47.616         | 0.000          | 0.075           | 203950      | 66733       | 45420       |
| P. el. leucophylla | P. el. meyeri        | P. grandis           | 0.182             | 39.259         | 0.000          | 0.075           | 197387      | 68820       | 47625       |
| P. el. leucophylla | P. juliae            | P. el. lofthousei    | 0.054             | 9.979          | 0.000          | 0.016           | 115882      | 54183       | 48631       |
| P. el. leucophylla | P. juliae            | P. el. pallasii      | 0.048             | 8.743          | 0.000          | 0.015           | 115095      | 55453       | 50393       |
| P. el. leucophylla | P. megaseifolia      | P. el. elatior       | 0.038             | 6.723          | 0.000          | 0.024           | 57662       | 70902       | 65738       |
| P. el. leucophylla | P. megaseifolia      | P. el. lofthousei    | 0.011             | 1.827          | 0.034          | 0.004           | 83569       | 63339       | 61921       |
| P. el. leucophylla | P. megaseifolia      | P. el. meyeri        | 0.025             | 4.161          | 0.000          | 0.022           | 50493       | 70066       | 66668       |
| P. el. leucophylla | P. megaseifolia      | P. el. pallasii      | 0.013             | 2.063          | 0.020          | 0.005           | 82372       | 65600       | 63959       |
| P. el. leucophylla | P. megaseifolia      | P. grandis           | 0.146             | 30.380         | 0.000          | 0.062           | 193226      | 68745       | 51225       |
| P. el. leucophylla | P. renifolia         | P. grandis           | 0.204             | 45.828         | 0.000          | 0.083           | 197927      | 70184       | 46412       |
| P. el. leucophylla | P. ve. veris         | P. el. pseudoelatior | 0.089             | 7.920          | 0.000          | 0.089           | 38318       | 101850      | 85286       |
| P. el. leucophylla | P. vu. heterochroma  | P. el. lofthousei    | 0.034             | 6.166          | 0.000          | 0.010           | 110939      | 56784       | 53042       |
| P. el. leucophylla | P. vu. heterochroma  | P. el. pallasii      | 0.034             | 5.943          | 0.000          | 0.011           | 109948      | 58707       | 54830       |
| P. el. leucophylla | P. vu. sibthorpii GE | P. el. lofthousei    | 0.004             | 0.839          | 0.201          | 0.001           | 112773      | 53591       | 53122       |
| P. el. leucophylla | P. vu. sibthorpii GE | P. el. pallasii      | 0.005             | 0.936          | 0.175          | 0.002           | 111817      | 55468       | 54914       |
| P. el. lofthousei  | P. el. cordifolia    | P. el. elatior       | 0.087             | 9.146          | 0.000          | 0.062           | 59192       | 88901       | 74700       |
| P. el. lofthousei  | P. el. cordifolia    | P. grandis           | 0.082             | 17.953         | 0.000          | 0.037           | 189024      | 70974       | 60226       |
| P. el. lofthousei  | P. el. elatior       | P. grandis           | 0.189             | 43.150         | 0.000          | 0.087           | 199590      | 79630       | 54350       |
| P. el. lofthousei  | P. el. leucophylla   | P. el. elatior       | 0.084             | 9.010          | 0.000          | 0.061           | 59343       | 89121       | 75284       |
| P. el. lofthousei  | P. el. leucophylla   | P. grandis           | 0.076             | 16.863         | 0.000          | 0.036           | 187801      | 70951       | 60886       |
| P. el. lofthousei  | P. el. meyeri        | P. grandis           | 0.226             | 54.513         | 0.000          | 0.107           | 179536      | 84193       | 53153       |
| P. el. lofthousei  | P. el. meyeri        | P. grandis           | 0.229             | 52.500         | 0.000          | 0.108           | 180881      | 83271       | 52220       |
| P. el. lofthousei  | P. el. pallasii      | P. el. cordifolia    | 0.043             | 8.695          | 0.000          | 0.009           | 260619      | 36312       | 33347       |
| P. el. lofthousei  | P. el. pallasii      | P. el. leucophylla   | 0.043             | 8.955          | 0.000          | 0.009           | 260943      | 36553       | 33547       |
| P. el. lofthousei  | P. el. pallasii      | P. el. meyeri        | 0.063             | 12.086         | 0.000          | 0.023           | 264739      | 37303       | 32882       |
| P. el. lofthousei  | P. el. pallasii      | P. el. meyeri        | 0.044             | 8.450          | 0.000          | 0.015           | 260627      | 36706       | 33636       |
| P. el. lofthousei  | P. el. pallasii      | P. el. pseudoelatior | 0.046             | 8.128          | 0.000          | 0.013           | 278993      | 35874       | 32724       |
| P. el. lofthousei  | P. el. pallasii      | P. grandis           | 0.035             | 10.911         | 0.000          | 0.008           | 389859      | 33776       | 31462       |
| P. el. lofthousei  | P. el. pallasii      | P. juliae            | 0.038             | 7.523          | 0.000          | 0.009           | 254076      | 36375       | 33686       |
| P. el. lofthousei  | P. el. pallasii      | P. megaseifolia      | 0.048             | 9.994          | 0.000          | 0.018           | 260842      | 37293       | 33849       |
| P. el. lofthousei  | P. el. pallasii      | P. renifolia         | 0.048             | 9.474          | 0.000          | 0.015           | 263649      | 36684       | 33310       |
| P. el. lofthousei  | P. el. pallasii      | P. ve. columnae      | 0.030             | 5.210          | 0.000          | 0.007           | 298786      | 34409       | 32428       |
| P. el. lofthousei  | P. el. pallasii      | P. ve. macrocalyx    | 0.028             | 5.035          | 0.000          | 0.008           | 300531      | 34417       | 32522       |
| P. el. lofthousei  | P. el. pallasii      | P. ve. veris         | 0.004             | 0.698          | 0.242          | 0.001           | 319552      | 32569       | 32294       |
| P. el. lofthousei  | P. el. pallasii      | P. vu. heterochroma  | 0.047             | 9.573          | 0.000          | 0.015           | 260078      | 37763       | 34355       |
| P. el. lofthousei  | P. el. pallasii      | P. vu. sibthorpii GE | 0.048             | 9.488          | 0.000          | 0.014           | 262496      | 37562       | 34141       |

| <b>P1</b>         | <b>P2</b>            | <b>P3</b>            | <b>Dstatistic</b> | <b>Z-score</b> | <b>p-value</b> | <b>f4-ratio</b> | <b>BBAA</b> | <b>ABBA</b> | <b>BABA</b> |
|-------------------|----------------------|----------------------|-------------------|----------------|----------------|-----------------|-------------|-------------|-------------|
| P. el. lofthousei | P. el. pallasii      | P. vu. sibthorpii TR | 0.040             | 7.812          | 0.000          | 0.011           | 269625      | 37729       | 34861       |
| P. el. lofthousei | P. el. pallasii      | P. vu. vulgaris      | 0.012             | 2.309          | 0.010          | 0.003           | 276102      | 36959       | 36100       |
| P. el. lofthousei | P. el. pseudoelator  | P. el. elatior       | 0.009             | 1.154          | 0.124          | 0.007           | 54091       | 88951       | 87347       |
| P. el. lofthousei | P. el. pseudoelator  | P. el. meyeri        | 0.122             | 15.021         | 0.000          | 0.097           | 53713       | 90373       | 70786       |
| P. el. lofthousei | P. el. pseudoelator  | P. juliae            | 0.133             | 15.166         | 0.000          | 0.075           | 50312       | 94595       | 72398       |
| P. el. lofthousei | P. el. pseudoelator  | P. megaseifolia      | 0.040             | 4.597          | 0.000          | 0.032           | 57520       | 82067       | 75797       |
| P. el. lofthousei | P. el. pseudoelator  | P. vu. heterochroma  | 0.151             | 21.378         | 0.000          | 0.111           | 51649       | 98416       | 72543       |
| P. el. lofthousei | P. juliae            | P. el. elatior       | 0.060             | 6.784          | 0.000          | 0.042           | 64460       | 83999       | 74505       |
| P. el. lofthousei | P. juliae            | P. grandis           | 0.071             | 16.134         | 0.000          | 0.032           | 192624      | 68206       | 59154       |
| P. el. lofthousei | P. megaseifolia      | P. grandis           | 0.208             | 41.463         | 0.000          | 0.095           | 182198      | 79470       | 52148       |
| P. el. lofthousei | P. megaseifolia      | P. ve. veris         | 0.169             | 24.178         | 0.000          | 0.086           | 111179      | 76668       | 54532       |
| P. el. lofthousei | P. renifolia         | P. grandis           | 0.243             | 55.812         | 0.000          | 0.116           | 179157      | 85385       | 51961       |
| P. el. lofthousei | P. ve. columnae      | P. el. cordifolia    | 0.101             | 10.667         | 0.000          | 0.056           | 46572       | 101053      | 82448       |
| P. el. lofthousei | P. ve. columnae      | P. el. leucophylla   | 0.097             | 10.341         | 0.000          | 0.051           | 47488       | 100765      | 83013       |
| P. el. lofthousei | P. ve. columnae      | P. el. meyeri        | 0.061             | 5.743          | 0.000          | 0.056           | 49766       | 94187       | 83341       |
| P. el. lofthousei | P. ve. columnae      | P. el. meyeri        | 0.017             | 1.943          | 0.026          | 0.015           | 50861       | 89660       | 86587       |
| P. el. lofthousei | P. ve. columnae      | P. juliae            | 0.007             | 0.760          | 0.223          | 0.004           | 48754       | 90484       | 89266       |
| P. el. lofthousei | P. ve. columnae      | P. renifolia         | 0.016             | 1.539          | 0.062          | 0.012           | 51874       | 88991       | 86231       |
| P. el. lofthousei | P. ve. columnae      | P. vu. heterochroma  | 0.022             | 2.823          | 0.002          | 0.017           | 50061       | 94067       | 90043       |
| P. el. lofthousei | P. ve. columnae      | P. vu. sibthorpii GE | 0.063             | 7.422          | 0.000          | 0.047           | 49752       | 97565       | 85996       |
| P. el. lofthousei | P. ve. columnae      | P. vu. sibthorpii TR | 0.058             | 7.063          | 0.000          | 0.040           | 54582       | 97988       | 87231       |
| P. el. lofthousei | P. ve. columnae      | P. vu. vulgaris      | 0.062             | 7.498          | 0.000          | 0.037           | 59283       | 98541       | 87067       |
| P. el. lofthousei | P. ve. macrocalyx    | P. el. cordifolia    | 0.107             | 10.540         | 0.000          | 0.059           | 46205       | 102664      | 82826       |
| P. el. lofthousei | P. ve. macrocalyx    | P. el. leucophylla   | 0.101             | 10.261         | 0.000          | 0.053           | 47142       | 102039      | 83395       |
| P. el. lofthousei | P. ve. macrocalyx    | P. el. meyeri        | 0.059             | 5.402          | 0.000          | 0.055           | 49750       | 94687       | 84066       |
| P. el. lofthousei | P. ve. macrocalyx    | P. el. meyeri        | 0.014             | 1.530          | 0.063          | 0.012           | 50967       | 89962       | 87471       |
| P. el. lofthousei | P. ve. macrocalyx    | P. juliae            | 0.001             | 0.117          | 0.453          | 0.001           | 49000       | 90494       | 90300       |
| P. el. lofthousei | P. ve. macrocalyx    | P. renifolia         | 0.013             | 1.263          | 0.103          | 0.010           | 51922       | 89393       | 87053       |
| P. el. lofthousei | P. ve. macrocalyx    | P. vu. heterochroma  | 0.015             | 1.858          | 0.032          | 0.012           | 50315       | 93788       | 91099       |
| P. el. lofthousei | P. ve. macrocalyx    | P. vu. sibthorpii GE | 0.056             | 6.418          | 0.000          | 0.041           | 49972       | 97226       | 86965       |
| P. el. lofthousei | P. ve. macrocalyx    | P. vu. sibthorpii TR | 0.045             | 5.400          | 0.000          | 0.030           | 55052       | 96712       | 88464       |
| P. el. lofthousei | P. ve. macrocalyx    | P. vu. vulgaris      | 0.054             | 6.316          | 0.000          | 0.032           | 59562       | 98086       | 88089       |
| P. el. lofthousei | P. ve. veris         | P. el. pseudoelator  | 0.335             | 44.674         | 0.000          | 0.310           | 35182       | 147775      | 73533       |
| P. el. lofthousei | P. vu. heterochroma  | P. el. elatior       | 0.059             | 6.553          | 0.000          | 0.042           | 64753       | 86496       | 76856       |
| P. el. lofthousei | P. vu. heterochroma  | P. grandis           | 0.049             | 11.107         | 0.000          | 0.022           | 195041      | 68700       | 62322       |
| P. el. lofthousei | P. vu. sibthorpii GE | P. el. elatior       | 0.066             | 7.599          | 0.000          | 0.048           | 61989       | 88493       | 77516       |
| P. el. lofthousei | P. vu. sibthorpii GE | P. grandis           | 0.048             | 10.390         | 0.000          | 0.022           | 192397      | 69600       | 63206       |
| P. el. lofthousei | P. vu. sibthorpii TR | P. el. elatior       | 0.057             | 6.748          | 0.000          | 0.043           | 61907       | 91769       | 81866       |
| P. el. lofthousei | P. vu. sibthorpii TR | P. grandis           | 0.009             | 1.628          | 0.052          | 0.004           | 193834      | 69635       | 68457       |
| P. el. lofthousei | P. vu. vulgaris      | P. el. elatior       | 0.053             | 6.599          | 0.000          | 0.042           | 61223       | 95948       | 86208       |
| P. el. lofthousei | P. vu. vulgaris      | P. megaseifolia      | 0.045             | 6.961          | 0.000          | 0.036           | 65617       | 82901       | 75816       |
| P. el. meyeri     | P. el. cordifolia    | P. el. lofthousei    | 0.025             | 4.618          | 0.000          | 0.008           | 95304       | 58018       | 55152       |
| P. el. meyeri     | P. el. cordifolia    | P. el. lofthousei    | 0.001             | 0.157          | 0.438          | 0.000           | 88913       | 59654       | 59540       |

| <b>P1</b>     | <b>P2</b>            | <b>P3</b>            | <b>Dstatistic</b> | <b>Z-score</b> | <b>p-value</b> | <b>f4-ratio</b> | <b>BBAA</b> | <b>ABBA</b> | <b>BABA</b> |
|---------------|----------------------|----------------------|-------------------|----------------|----------------|-----------------|-------------|-------------|-------------|
| P. el. meyeri | P. el. cordifolia    | P. el. pallasii      | 0.015             | 2.712          | 0.003          | 0.005           | 93842       | 59486       | 57765       |
| P. el. meyeri | P. el. cordifolia    | P. el. pallasii      | 0.003             | 0.440          | 0.330          | 0.001           | 87872       | 61682       | 61354       |
| P. el. meyeri | P. el. cordifolia    | P. ve. columnae      | 0.088             | 13.070         | 0.000          | 0.044           | 85563       | 66018       | 55298       |
| P. el. meyeri | P. el. cordifolia    | P. ve. macrocalyx    | 0.100             | 14.840         | 0.000          | 0.061           | 85799       | 67439       | 55206       |
| P. el. meyeri | P. el. cordifolia    | P. ve. veris         | 0.080             | 11.636         | 0.000          | 0.041           | 105384      | 61576       | 52503       |
| P. el. meyeri | P. el. cordifolia    | P. ve. veris         | 0.105             | 17.157         | 0.000          | 0.057           | 101136      | 66135       | 53558       |
| P. el. meyeri | P. el. elatior       | P. el. cordifolia    | 0.001             | 0.228          | 0.410          | 0.000           | 88626       | 53039       | 52915       |
| P. el. meyeri | P. el. elatior       | P. el. lofthousei    | 0.175             | 18.913         | 0.000          | 0.050           | 128324      | 61667       | 43317       |
| P. el. meyeri | P. el. elatior       | P. el. lofthousei    | 0.137             | 17.083         | 0.000          | 0.043           | 113099      | 63971       | 48591       |
| P. el. meyeri | P. el. elatior       | P. el. pallasii      | 0.114             | 15.048         | 0.000          | 0.035           | 128656      | 58681       | 46638       |
| P. el. meyeri | P. el. elatior       | P. el. pallasii      | 0.093             | 13.288         | 0.000          | 0.031           | 113623      | 61684       | 51148       |
| P. el. meyeri | P. el. elatior       | P. juliae            | 0.007             | 1.412          | 0.079          | 0.003           | 93131       | 52951       | 52209       |
| P. el. meyeri | P. el. elatior       | P. vu. heterochroma  | 0.014             | 3.132          | 0.001          | 0.007           | 95241       | 54551       | 52996       |
| P. el. meyeri | P. el. elatior       | P. vu. sibthorpii GE | 0.016             | 3.189          | 0.001          | 0.007           | 93874       | 54666       | 52971       |
| P. el. meyeri | P. el. elatior       | P. vu. sibthorpii TR | 0.050             | 11.304         | 0.000          | 0.022           | 98751       | 58113       | 52576       |
| P. el. meyeri | P. el. elatior       | P. vu. vulgaris      | 0.034             | 6.787          | 0.000          | 0.012           | 114665      | 55464       | 51838       |
| P. el. meyeri | P. el. elatior       | P. vu. vulgaris      | 0.095             | 20.077         | 0.000          | 0.037           | 103205      | 62313       | 51464       |
| P. el. meyeri | P. el. leucophylla   | P. el. lofthousei    | 0.021             | 3.923          | 0.000          | 0.007           | 95808       | 58148       | 55739       |
| P. el. meyeri | P. el. leucophylla   | P. el. pallasii      | 0.011             | 2.024          | 0.021          | 0.004           | 94258       | 59581       | 58288       |
| P. el. meyeri | P. el. leucophylla   | P. ve. columnae      | 0.077             | 11.600         | 0.000          | 0.038           | 86122       | 65320       | 56007       |
| P. el. meyeri | P. el. leucophylla   | P. ve. macrocalyx    | 0.086             | 13.819         | 0.000          | 0.053           | 86421       | 66447       | 55957       |
| P. el. meyeri | P. el. leucophylla   | P. ve. veris         | 0.067             | 10.045         | 0.000          | 0.035           | 105947      | 60856       | 53206       |
| P. el. meyeri | P. el. leucophylla   | P. ve. veris         | 0.093             | 15.828         | 0.000          | 0.051           | 101678      | 65479       | 54319       |
| P. el. meyeri | P. el. meyeri        | P. el. cordifolia    | 0.080             | 17.476         | 0.000          | 0.026           | 87679       | 53502       | 45561       |
| P. el. meyeri | P. el. meyeri        | P. el. leucophylla   | 0.081             | 17.247         | 0.000          | 0.025           | 87621       | 53593       | 45601       |
| P. el. meyeri | P. el. meyeri        | P. el. lofthousei    | 0.031             | 5.479          | 0.000          | 0.008           | 118362      | 47546       | 44718       |
| P. el. meyeri | P. el. meyeri        | P. el. pallasii      | 0.015             | 2.791          | 0.003          | 0.004           | 117646      | 48732       | 47288       |
| P. el. meyeri | P. el. meyeri        | P. el. pseudoelatior | 0.071             | 14.497         | 0.000          | 0.033           | 97831       | 51974       | 45107       |
| P. el. meyeri | P. el. meyeri        | P. grandis           | 0.002             | 0.439          | 0.330          | 0.001           | 220282      | 47326       | 47156       |
| P. el. meyeri | P. el. meyeri        | P. juliae            | 0.058             | 11.929         | 0.000          | 0.020           | 93034       | 51371       | 45706       |
| P. el. meyeri | P. el. meyeri        | P. megaseifolia      | 0.005             | 0.915          | 0.180          | 0.003           | 80404       | 49446       | 48982       |
| P. el. meyeri | P. el. meyeri        | P. ve. columnae      | 0.058             | 11.480         | 0.000          | 0.022           | 114509      | 49906       | 44474       |
| P. el. meyeri | P. el. meyeri        | P. ve. macrocalyx    | 0.062             | 12.250         | 0.000          | 0.028           | 115368      | 50244       | 44422       |
| P. el. meyeri | P. el. meyeri        | P. ve. veris         | 0.041             | 7.493          | 0.000          | 0.016           | 134432      | 47051       | 43381       |
| P. el. meyeri | P. el. meyeri        | P. vu. heterochroma  | 0.056             | 12.462         | 0.000          | 0.025           | 95398       | 52241       | 46716       |
| P. el. meyeri | P. el. meyeri        | P. vu. sibthorpii GE | 0.067             | 13.766         | 0.000          | 0.029           | 93683       | 52938       | 46335       |
| P. el. meyeri | P. el. meyeri        | P. vu. sibthorpii TR | 0.066             | 14.903         | 0.000          | 0.026           | 99364       | 53346       | 46732       |
| P. el. meyeri | P. el. meyeri        | P. vu. vulgaris      | 0.072             | 16.136         | 0.000          | 0.025           | 104528      | 53610       | 46369       |
| P. el. meyeri | P. el. pseudoelatior | P. el. cordifolia    | 0.018             | 2.071          | 0.019          | 0.008           | 56803       | 70729       | 68250       |
| P. el. meyeri | P. el. pseudoelatior | P. el. cordifolia    | 0.074             | 8.421          | 0.000          | 0.034           | 55583       | 76186       | 65657       |
| P. el. meyeri | P. el. pseudoelatior | P. el. leucophylla   | 0.015             | 1.786          | 0.037          | 0.007           | 57212       | 70665       | 68576       |
| P. el. meyeri | P. el. pseudoelatior | P. el. leucophylla   | 0.072             | 8.234          | 0.000          | 0.032           | 56066       | 76167       | 65953       |
| P. el. meyeri | P. el. pseudoelatior | P. juliae            | 0.026             | 3.093          | 0.001          | 0.013           | 62052       | 70014       | 66436       |

| <b>P1</b>     | <b>P2</b>            | <b>P3</b>            | <b>Dstatistic</b> | <b>Z-score</b> | <b>p-value</b> | <b>f4-ratio</b> | <b>BBAA</b> | <b>ABBA</b> | <b>BABA</b> |
|---------------|----------------------|----------------------|-------------------|----------------|----------------|-----------------|-------------|-------------|-------------|
| P. el. meyeri | P. el. pseudoelator  | P. vu. heterochroma  | 0.001             | 0.091          | 0.464          | 0.000           | 64991       | 68073       | 67983       |
| P. el. meyeri | P. el. pseudoelator  | P. vu. sibthorpii GE | 0.021             | 2.728          | 0.003          | 0.013           | 62172       | 70294       | 67390       |
| P. el. meyeri | P. el. pseudoelator  | P. vu. vulgaris      | 0.001             | 0.124          | 0.450          | 0.000           | 73046       | 68724       | 68602       |
| P. el. meyeri | P. juliae            | P. el. lofthousei    | 0.067             | 11.597         | 0.000          | 0.023           | 88500       | 64125       | 56046       |
| P. el. meyeri | P. juliae            | P. el. lofthousei    | 0.042             | 6.556          | 0.000          | 0.015           | 83644       | 64996       | 59749       |
| P. el. meyeri | P. juliae            | P. el. pallasii      | 0.051             | 9.580          | 0.000          | 0.019           | 87198       | 65433       | 59047       |
| P. el. meyeri | P. juliae            | P. el. pallasii      | 0.039             | 6.447          | 0.000          | 0.015           | 82773       | 66829       | 61850       |
| P. el. meyeri | P. juliae            | P. el. pseudoelator  | 0.009             | 1.411          | 0.079          | 0.006           | 67602       | 65309       | 64122       |
| P. el. meyeri | P. juliae            | P. ve. columnae      | 0.025             | 3.976          | 0.000          | 0.013           | 82731       | 64968       | 61785       |
| P. el. meyeri | P. juliae            | P. ve. macrocalyx    | 0.022             | 3.518          | 0.000          | 0.014           | 83778       | 64892       | 62084       |
| P. el. meyeri | P. juliae            | P. ve. veris         | 0.009             | 1.235          | 0.108          | 0.005           | 101301      | 61173       | 60124       |
| P. el. meyeri | P. megaseifolia      | P. el. lofthousei    | 0.036             | 6.582          | 0.000          | 0.011           | 95806       | 56181       | 52291       |
| P. el. meyeri | P. megaseifolia      | P. el. lofthousei    | 0.010             | 1.773          | 0.038          | 0.003           | 94358       | 55341       | 54299       |
| P. el. meyeri | P. megaseifolia      | P. el. pallasii      | 0.026             | 4.772          | 0.000          | 0.009           | 94569       | 58024       | 55044       |
| P. el. meyeri | P. megaseifolia      | P. el. pallasii      | 0.013             | 2.400          | 0.008          | 0.004           | 93500       | 57524       | 56049       |
| P. el. meyeri | P. renifolia         | P. el. cordifolia    | 0.018             | 3.798          | 0.000          | 0.004           | 137542      | 39331       | 37943       |
| P. el. meyeri | P. renifolia         | P. el. elatior       | 0.069             | 14.915         | 0.000          | 0.033           | 106584      | 47657       | 41499       |
| P. el. meyeri | P. renifolia         | P. el. leucophylla   | 0.015             | 3.152          | 0.001          | 0.004           | 136998      | 39303       | 38108       |
| P. el. meyeri | P. renifolia         | P. el. lofthousei    | 0.010             | 2.257          | 0.012          | 0.003           | 123828      | 44570       | 43646       |
| P. el. meyeri | P. renifolia         | P. el. meyeri        | 0.073             | 13.652         | 0.000          | 0.052           | 98330       | 46896       | 40546       |
| P. el. meyeri | P. renifolia         | P. grandis           | 0.027             | 6.699          | 0.000          | 0.009           | 224853      | 47130       | 44644       |
| P. el. meyeri | P. renifolia         | P. grandis           | 0.031             | 7.997          | 0.000          | 0.009           | 267514      | 39026       | 36708       |
| P. el. meyeri | P. renifolia         | P. juliae            | 0.014             | 2.894          | 0.002          | 0.004           | 141977      | 38712       | 37636       |
| P. el. meyeri | P. renifolia         | P. megaseifolia      | 0.010             | 2.017          | 0.022          | 0.006           | 84357       | 47890       | 46910       |
| P. el. meyeri | P. renifolia         | P. megaseifolia      | 0.018             | 3.711          | 0.000          | 0.009           | 127213      | 39759       | 38328       |
| P. el. meyeri | P. renifolia         | P. vu. heterochroma  | 0.008             | 1.701          | 0.044          | 0.003           | 145070      | 39194       | 38594       |
| P. el. meyeri | P. renifolia         | P. vu. sibthorpii GE | 0.010             | 2.268          | 0.012          | 0.003           | 143564      | 39334       | 38552       |
| P. el. meyeri | P. renifolia         | P. vu. sibthorpii TR | 0.014             | 3.192          | 0.001          | 0.004           | 149513      | 39817       | 38742       |
| P. el. meyeri | P. renifolia         | P. vu. vulgaris      | 0.012             | 2.713          | 0.003          | 0.003           | 154951      | 39544       | 38605       |
| P. el. meyeri | P. ve. veris         | P. el. pseudoelator  | 0.159             | 14.761         | 0.000          | 0.149           | 37939       | 109683      | 79583       |
| P. el. meyeri | P. ve. veris         | P. el. pseudoelator  | 0.195             | 19.954         | 0.000          | 0.179           | 38780       | 113631      | 76502       |
| P. el. meyeri | P. vu. heterochroma  | P. el. lofthousei    | 0.051             | 8.711          | 0.000          | 0.017           | 90364       | 64789       | 58467       |
| P. el. meyeri | P. vu. heterochroma  | P. el. lofthousei    | 0.028             | 4.594          | 0.000          | 0.010           | 85514       | 65481       | 61973       |
| P. el. meyeri | P. vu. heterochroma  | P. el. pallasii      | 0.041             | 6.864          | 0.000          | 0.015           | 89076       | 66754       | 61504       |
| P. el. meyeri | P. vu. heterochroma  | P. el. pallasii      | 0.029             | 4.903          | 0.000          | 0.011           | 84621       | 67935       | 64084       |
| P. el. meyeri | P. vu. heterochroma  | P. ve. columnae      | 0.038             | 6.029          | 0.000          | 0.019           | 83719       | 67315       | 62421       |
| P. el. meyeri | P. vu. heterochroma  | P. ve. macrocalyx    | 0.032             | 5.319          | 0.000          | 0.021           | 84863       | 67004       | 62792       |
| P. el. meyeri | P. vu. heterochroma  | P. ve. veris         | 0.021             | 3.144          | 0.001          | 0.012           | 102937      | 63433       | 60813       |
| P. el. meyeri | P. vu. sibthorpii GE | P. el. lofthousei    | 0.024             | 4.265          | 0.000          | 0.008           | 92767       | 61484       | 58645       |
| P. el. meyeri | P. vu. sibthorpii GE | P. el. lofthousei    | 0.001             | 0.124          | 0.450          | 0.000           | 87151       | 62547       | 62461       |
| P. el. meyeri | P. vu. sibthorpii GE | P. el. pallasii      | 0.014             | 2.511          | 0.006          | 0.005           | 91445       | 63372       | 61625       |
| P. el. meyeri | P. vu. sibthorpii GE | P. el. pallasii      | 0.004             | 0.641          | 0.261          | 0.001           | 86261       | 65015       | 64553       |
| P. el. meyeri | P. vu. sibthorpii GE | P. ve. columnae      | 0.027             | 4.091          | 0.000          | 0.014           | 85178       | 64578       | 61134       |

| <b>P1</b>       | <b>P2</b>            | <b>P3</b>            | <b>Dstatistic</b> | <b>Z-score</b> | <b>p-value</b> | <b>f4-ratio</b> | <b>BBAA</b> | <b>ABBA</b> | <b>BABA</b> |
|-----------------|----------------------|----------------------|-------------------|----------------|----------------|-----------------|-------------|-------------|-------------|
| P. el. meyeri   | P. vu. sibthorpii GE | P. ve. columnnae     | 0.068             | 11.280         | 0.000          | 0.035           | 82627       | 69146       | 60324       |
| P. el. meyeri   | P. vu. sibthorpii GE | P. ve. macrocalyx    | 0.018             | 2.867          | 0.002          | 0.012           | 86083       | 64007       | 61689       |
| P. el. meyeri   | P. vu. sibthorpii GE | P. ve. macrocalyx    | 0.063             | 10.684         | 0.000          | 0.040           | 83687       | 68754       | 60639       |
| P. el. meyeri   | P. vu. sibthorpii GE | P. ve. veris         | 0.025             | 3.663          | 0.000          | 0.014           | 104985      | 61185       | 58167       |
| P. el. meyeri   | P. vu. sibthorpii GE | P. ve. veris         | 0.053             | 8.610          | 0.000          | 0.030           | 101603      | 65232       | 58608       |
| P. el. meyeri   | P. vu. sibthorpii TR | P. ve. columnnae     | 0.030             | 4.678          | 0.000          | 0.016           | 83502       | 69643       | 65595       |
| P. el. meyeri   | P. vu. sibthorpii TR | P. ve. macrocalyx    | 0.016             | 2.602          | 0.005          | 0.010           | 84878       | 68305       | 66183       |
| P. el. meyeri   | P. vu. sibthorpii TR | P. ve. veris         | 0.006             | 0.991          | 0.161          | 0.004           | 103085      | 64937       | 64105       |
| P. el. meyeri   | P. vu. vulgaris      | P. el. cordifolia    | 0.102             | 12.531         | 0.000          | 0.052           | 53687       | 85894       | 69959       |
| P. el. meyeri   | P. vu. vulgaris      | P. el. leucophylla   | 0.093             | 11.108         | 0.000          | 0.045           | 54315       | 84673       | 70334       |
| P. el. meyeri   | P. vu. vulgaris      | P. el. pseudoelator  | 0.018             | 2.783          | 0.003          | 0.013           | 66344       | 73822       | 71166       |
| P. el. meyeri   | P. vu. vulgaris      | P. ve. veris         | 0.008             | 1.039          | 0.149          | 0.005           | 101292      | 68689       | 67663       |
| P. el. pallasii | P. el. cordifolia    | P. grandis           | 0.064             | 14.490         | 0.000          | 0.028           | 194852      | 70284       | 61876       |
| P. el. pallasii | P. el. elatior       | P. grandis           | 0.170             | 39.308         | 0.000          | 0.077           | 201209      | 80111       | 56813       |
| P. el. pallasii | P. el. leucophylla   | P. grandis           | 0.058             | 13.393         | 0.000          | 0.026           | 193565      | 70232       | 62515       |
| P. el. pallasii | P. el. lofthousei    | P. el. elatior       | 0.024             | 4.271          | 0.000          | 0.008           | 255511      | 40373       | 38481       |
| P. el. pallasii | P. el. meyeri        | P. grandis           | 0.211             | 51.815         | 0.000          | 0.098           | 186153      | 83607       | 54424       |
| P. el. pallasii | P. el. meyeri        | P. grandis           | 0.213             | 48.064         | 0.000          | 0.099           | 186436      | 83011       | 53830       |
| P. el. pallasii | P. el. pseudoelator  | P. el. elatior       | 0.019             | 2.449          | 0.007          | 0.014           | 56895       | 88790       | 85539       |
| P. el. pallasii | P. el. pseudoelator  | P. el. meyeri        | 0.101             | 12.736         | 0.000          | 0.081           | 55684       | 89434       | 73016       |
| P. el. pallasii | P. el. pseudoelator  | P. juliae            | 0.116             | 13.874         | 0.000          | 0.065           | 52206       | 93779       | 74302       |
| P. el. pallasii | P. el. pseudoelator  | P. megaseifolia      | 0.015             | 1.831          | 0.034          | 0.012           | 59464       | 80890       | 78477       |
| P. el. pallasii | P. el. pseudoelator  | P. renifolia         | 0.109             | 12.088         | 0.000          | 0.077           | 56212       | 89803       | 72170       |
| P. el. pallasii | P. el. pseudoelator  | P. vu. heterochroma  | 0.130             | 19.058         | 0.000          | 0.096           | 53515       | 97484       | 75002       |
| P. el. pallasii | P. juliae            | P. grandis           | 0.052             | 12.293         | 0.000          | 0.023           | 198125      | 67721       | 61039       |
| P. el. pallasii | P. megaseifolia      | P. grandis           | 0.191             | 38.353         | 0.000          | 0.085           | 188136      | 79096       | 53735       |
| P. el. pallasii | P. megaseifolia      | P. ve. veris         | 0.167             | 25.038         | 0.000          | 0.084           | 115598      | 76143       | 54352       |
| P. el. pallasii | P. renifolia         | P. grandis           | 0.228             | 52.908         | 0.000          | 0.106           | 184951      | 85102       | 53486       |
| P. el. pallasii | P. ve. columnnae     | P. el. cordifolia    | 0.082             | 8.859          | 0.000          | 0.045           | 47188       | 100391      | 85169       |
| P. el. pallasii | P. ve. columnnae     | P. el. leucophylla   | 0.077             | 8.481          | 0.000          | 0.041           | 48070       | 100062      | 85736       |
| P. el. pallasii | P. ve. columnnae     | P. el. meyeri        | 0.033             | 3.198          | 0.001          | 0.030           | 50290       | 93087       | 87206       |
| P. el. pallasii | P. ve. columnnae     | P. vu. heterochroma  | 0.001             | 0.079          | 0.469          | 0.000           | 51147       | 93453       | 93342       |
| P. el. pallasii | P. ve. columnnae     | P. vu. sibthorpii GE | 0.041             | 5.099          | 0.000          | 0.031           | 50763       | 96958       | 89241       |
| P. el. pallasii | P. ve. columnnae     | P. vu. sibthorpii TR | 0.040             | 5.136          | 0.000          | 0.027           | 55826       | 97451       | 89982       |
| P. el. pallasii | P. ve. columnnae     | P. vu. vulgaris      | 0.055             | 6.649          | 0.000          | 0.032           | 61205       | 98465       | 88260       |
| P. el. pallasii | P. ve. macrocalyx    | P. el. cordifolia    | 0.088             | 8.897          | 0.000          | 0.049           | 46721       | 102064      | 85590       |
| P. el. pallasii | P. ve. macrocalyx    | P. el. leucophylla   | 0.081             | 8.546          | 0.000          | 0.043           | 47653       | 101396      | 86183       |
| P. el. pallasii | P. ve. macrocalyx    | P. el. meyeri        | 0.031             | 2.933          | 0.002          | 0.029           | 50209       | 93653       | 88033       |
| P. el. pallasii | P. ve. macrocalyx    | P. vu. sibthorpii GE | 0.034             | 4.103          | 0.000          | 0.025           | 50944       | 96683       | 90347       |
| P. el. pallasii | P. ve. macrocalyx    | P. vu. sibthorpii TR | 0.026             | 3.364          | 0.000          | 0.018           | 56256       | 96205       | 91335       |
| P. el. pallasii | P. ve. macrocalyx    | P. vu. vulgaris      | 0.046             | 5.548          | 0.000          | 0.027           | 61406       | 98036       | 89349       |
| P. el. pallasii | P. ve. veris         | P. el. pseudoelator  | 0.317             | 38.885         | 0.000          | 0.295           | 34619       | 148157      | 76856       |
| P. el. pallasii | P. vu. heterochroma  | P. grandis           | 0.030             | 7.265          | 0.000          | 0.013           | 201252      | 68134       | 64203       |



| <b>P1</b>            | <b>P2</b>            | <b>P3</b>         | <b>Dstatistic</b> | <b>Z-score</b> | <b>p-value</b> | <b>f4-ratio</b> | <b>BBA</b> | <b>ABBA</b> | <b>BABA</b> |
|----------------------|----------------------|-------------------|-------------------|----------------|----------------|-----------------|------------|-------------|-------------|
| P. el. pallasii      | P. vu. sibthorpii GE | P. grandis        | 0.029             | 6.690          | 0.000          | 0.013           | 198648     | 69071       | 65137       |
| P. el. pallasii      | P. vu. sibthorpii TR | P. el. elatior    | 0.068             | 9.166          | 0.000          | 0.049           | 64717      | 91934       | 80192       |
| P. el. pallasii      | P. vu. vulgaris      | P. el. elatior    | 0.063             | 8.878          | 0.000          | 0.048           | 62463      | 96750       | 85221       |
| P. el. pallasii      | P. vu. vulgaris      | P. el. meyeri     | 0.070             | 10.522         | 0.000          | 0.056           | 64035      | 87200       | 75739       |
| P. el. pallasii      | P. vu. vulgaris      | P. megaseifolia   | 0.019             | 2.960          | 0.002          | 0.016           | 65998      | 82380       | 79319       |
| P. el. pseudoelatior | P. el. cordifolia    | P. el. lofthousei | 0.150             | 21.193         | 0.000          | 0.046           | 105358     | 65485       | 48393       |
| P. el. pseudoelatior | P. el. cordifolia    | P. el. pallasii   | 0.150             | 20.070         | 0.000          | 0.049           | 104349     | 67443       | 49851       |
| P. el. pseudoelatior | P. el. cordifolia    | P. grandis        | 0.131             | 16.271         | 0.000          | 0.048           | 224135     | 62352       | 47884       |
| P. el. pseudoelatior | P. el. cordifolia    | P. megaseifolia   | 0.122             | 13.160         | 0.000          | 0.075           | 84904      | 66135       | 51708       |
| P. el. pseudoelatior | P. el. elatior       | P. grandis        | 0.233             | 30.363         | 0.000          | 0.097           | 203944     | 79275       | 49311       |
| P. el. pseudoelatior | P. el. elatior       | P. vu. vulgaris   | 0.024             | 3.275          | 0.001          | 0.013           | 69582      | 78195       | 74523       |
| P. el. pseudoelatior | P. el. leucophylla   | P. el. lofthousei | 0.146             | 20.585         | 0.000          | 0.045           | 105714     | 65828       | 49073       |
| P. el. pseudoelatior | P. el. leucophylla   | P. el. pallasii   | 0.146             | 19.569         | 0.000          | 0.048           | 104654     | 67790       | 50509       |
| P. el. pseudoelatior | P. el. leucophylla   | P. grandis        | 0.124             | 15.495         | 0.000          | 0.046           | 222739     | 62197       | 48433       |
| P. el. pseudoelatior | P. el. leucophylla   | P. megaseifolia   | 0.120             | 12.958         | 0.000          | 0.075           | 84842      | 66440       | 52215       |
| P. el. pseudoelatior | P. el. lofthousei    | P. grandis        | 0.024             | 3.003          | 0.001          | 0.012           | 184807     | 73026       | 69608       |
| P. el. pseudoelatior | P. el. meyeri        | P. el. lofthousei | 0.122             | 16.552         | 0.000          | 0.038           | 95955      | 66854       | 52317       |
| P. el. pseudoelatior | P. el. meyeri        | P. el. pallasii   | 0.131             | 17.330         | 0.000          | 0.045           | 94617      | 70002       | 53765       |
| P. el. pseudoelatior | P. el. meyeri        | P. grandis        | 0.295             | 46.863         | 0.000          | 0.116           | 205709     | 78219       | 42615       |
| P. el. pseudoelatior | P. el. meyeri        | P. grandis        | 0.283             | 41.583         | 0.000          | 0.116           | 200102     | 79937       | 44686       |
| P. el. pseudoelatior | P. el. pallasii      | P. grandis        | 0.042             | 5.493          | 0.000          | 0.020           | 190673     | 75175       | 69052       |
| P. el. pseudoelatior | P. juliae            | P. grandis        | 0.108             | 13.581         | 0.000          | 0.042           | 214701     | 64474       | 51952       |
| P. el. pseudoelatior | P. megaseifolia      | P. el. meyeri     | 0.101             | 11.012         | 0.000          | 0.088           | 47115      | 81545       | 66577       |
| P. el. pseudoelatior | P. megaseifolia      | P. grandis        | 0.242             | 34.791         | 0.000          | 0.104           | 192908     | 81275       | 49644       |
| P. el. pseudoelatior | P. renifolia         | P. el. lofthousei | 0.124             | 16.668         | 0.000          | 0.041           | 90858      | 69688       | 54311       |
| P. el. pseudoelatior | P. renifolia         | P. grandis        | 0.301             | 49.496         | 0.000          | 0.124           | 199647     | 81857       | 43977       |
| P. el. pseudoelatior | P. ve. veris         | P. ve. columnae   | 0.128             | 9.191          | 0.000          | 0.145           | 32918      | 99145       | 76595       |
| P. el. pseudoelatior | P. ve. veris         | P. ve. macrocalyx | 0.240             | 20.743         | 0.000          | 0.319           | 35945      | 103498      | 63465       |
| P. el. pseudoelatior | P. vu. heterochroma  | P. el. meyeri     | 0.032             | 3.769          | 0.000          | 0.022           | 72702      | 66946       | 62771       |
| P. el. pseudoelatior | P. vu. heterochroma  | P. grandis        | 0.087             | 11.575         | 0.000          | 0.033           | 219751     | 63769       | 53528       |
| P. el. pseudoelatior | P. vu. sibthorpii GE | P. el. lofthousei | 0.145             | 21.276         | 0.000          | 0.046           | 102686     | 68425       | 51069       |
| P. el. pseudoelatior | P. vu. sibthorpii GE | P. el. meyeri     | 0.042             | 5.261          | 0.000          | 0.028           | 75368      | 65797       | 60449       |
| P. el. pseudoelatior | P. vu. sibthorpii GE | P. el. pallasii   | 0.145             | 20.829         | 0.000          | 0.050           | 101822     | 70868       | 52875       |
| P. el. pseudoelatior | P. vu. sibthorpii GE | P. grandis        | 0.089             | 11.917         | 0.000          | 0.033           | 223251     | 62345       | 52198       |
| P. el. pseudoelatior | P. vu. sibthorpii GE | P. renifolia      | 0.051             | 5.696          | 0.000          | 0.030           | 75512      | 66663       | 60202       |
| P. el. pseudoelatior | P. vu. sibthorpii TR | P. el. lofthousei | 0.107             | 14.863         | 0.000          | 0.035           | 102015     | 69532       | 56144       |
| P. el. pseudoelatior | P. vu. sibthorpii TR | P. el. meyeri     | 0.003             | 0.335          | 0.369          | 0.002           | 69720      | 68190       | 67785       |
| P. el. pseudoelatior | P. vu. sibthorpii TR | P. el. meyeri     | 0.005             | 0.530          | 0.298          | 0.003           | 74695      | 66414       | 65814       |
| P. el. pseudoelatior | P. vu. sibthorpii TR | P. el. pallasii   | 0.102             | 14.182         | 0.000          | 0.036           | 101225     | 71445       | 58234       |
| P. el. pseudoelatior | P. vu. sibthorpii TR | P. grandis        | 0.042             | 5.242          | 0.000          | 0.016           | 223270     | 62685       | 57670       |
| P. el. pseudoelatior | P. vu. sibthorpii TR | P. megaseifolia   | 0.065             | 7.667          | 0.000          | 0.043           | 82270      | 69123       | 60738       |
| P. el. pseudoelatior | P. vu. sibthorpii TR | P. renifolia      | 0.015             | 1.673          | 0.047          | 0.009           | 74590      | 67410       | 65381       |
| P. el. pseudoelatior | P. vu. vulgaris      | P. el. cordifolia | 0.086             | 7.713          | 0.000          | 0.045           | 54353      | 86182       | 72534       |

| <b>P1</b>           | <b>P2</b>          | <b>P3</b>           | <b>Dstatistic</b> | <b>Z-score</b> | <b>p-value</b> | <b>f4-ratio</b> | <b>BBAA</b> | <b>ABBA</b> | <b>BABA</b> |
|---------------------|--------------------|---------------------|-------------------|----------------|----------------|-----------------|-------------|-------------|-------------|
| P. el. pseudoelator | P. vu. vulgaris    | P. el. leucophylla  | 0.079             | 7.117          | 0.000          | 0.039           | 55145       | 85222       | 72797       |
| P. el. pseudoelator | P. vu. vulgaris    | P. el. lothousei    | 0.065             | 7.949          | 0.000          | 0.022           | 101349      | 69930       | 61430       |
| P. el. pseudoelator | P. vu. vulgaris    | P. el. pallasii     | 0.045             | 5.444          | 0.000          | 0.017           | 101001      | 70310       | 64218       |
| P. el. pseudoelator | P. vu. vulgaris    | P. megaseifolia     | 0.007             | 0.768          | 0.221          | 0.005           | 82033       | 67697       | 66735       |
| P. grandis          | P. ve. columnae    | P. el. meyeri       | 0.363             | 45.406         | 0.000          | 0.365           | 40402       | 204104      | 95299       |
| P. grandis          | P. ve. columnae    | P. el. meyeri       | 0.349             | 46.060         | 0.000          | 0.334           | 42148       | 199599      | 96319       |
| P. grandis          | P. ve. columnae    | P. megaseifolia     | 0.318             | 39.898         | 0.000          | 0.300           | 47971       | 190588      | 98651       |
| P. grandis          | P. ve. columnae    | P. renifolia        | 0.333             | 42.907         | 0.000          | 0.299           | 41854       | 197935      | 99003       |
| P. grandis          | P. ve. macrocalyx  | P. el. meyeri       | 0.361             | 44.271         | 0.000          | 0.363           | 40191       | 204883      | 96133       |
| P. grandis          | P. ve. macrocalyx  | P. el. meyeri       | 0.346             | 45.403         | 0.000          | 0.332           | 42034       | 200122      | 97294       |
| P. grandis          | P. ve. macrocalyx  | P. megaseifolia     | 0.314             | 39.251         | 0.000          | 0.297           | 47920       | 190890      | 99580       |
| P. grandis          | P. ve. macrocalyx  | P. renifolia        | 0.331             | 41.932         | 0.000          | 0.297           | 41679       | 198554      | 99890       |
| P. grandis          | P. ve. veris       | P. el. cordifolia   | 0.372             | 49.362         | 0.000          | 0.250           | 42918       | 214733      | 98344       |
| P. grandis          | P. ve. veris       | P. el. elatior      | 0.269             | 33.944         | 0.000          | 0.234           | 43798       | 201249      | 116040      |
| P. grandis          | P. ve. veris       | P. el. leucophylla  | 0.367             | 49.450         | 0.000          | 0.238           | 43724       | 212598      | 98379       |
| P. grandis          | P. ve. veris       | P. el. meyeri       | 0.273             | 34.807         | 0.000          | 0.288           | 37719       | 201331      | 114966      |
| P. grandis          | P. ve. veris       | P. el. meyeri       | 0.264             | 35.191         | 0.000          | 0.268           | 39170       | 198266      | 115365      |
| P. grandis          | P. ve. veris       | P. el. pallasii     | 0.249             | 32.394         | 0.000          | 0.154           | 64233       | 185081      | 111397      |
| P. grandis          | P. ve. veris       | P. juliae           | 0.348             | 47.940         | 0.000          | 0.245           | 47285       | 206704      | 100009      |
| P. grandis          | P. ve. veris       | P. megaseifolia     | 0.229             | 29.419         | 0.000          | 0.227           | 45392       | 188200      | 118186      |
| P. grandis          | P. ve. veris       | P. renifolia        | 0.244             | 31.664         | 0.000          | 0.230           | 39335       | 195428      | 118787      |
| P. juliae           | P. el. cordifolia  | P. el. elatior      | 0.044             | 7.456          | 0.000          | 0.022           | 95334       | 57388       | 52545       |
| P. juliae           | P. el. cordifolia  | P. el. meyeri       | 0.071             | 11.110         | 0.000          | 0.047           | 88518       | 58703       | 50971       |
| P. juliae           | P. el. cordifolia  | P. el. meyeri       | 0.051             | 8.382          | 0.000          | 0.030           | 93481       | 56046       | 50571       |
| P. juliae           | P. el. cordifolia  | P. el. pseudoelator | 0.111             | 19.472         | 0.000          | 0.064           | 89632       | 62510       | 50013       |
| P. juliae           | P. el. cordifolia  | P. grandis          | 0.018             | 3.930          | 0.000          | 0.006           | 237625      | 49722       | 47999       |
| P. juliae           | P. el. cordifolia  | P. megaseifolia     | 0.033             | 5.121          | 0.000          | 0.019           | 99748       | 54016       | 50614       |
| P. juliae           | P. el. cordifolia  | P. renifolia        | 0.053             | 8.729          | 0.000          | 0.028           | 93013       | 56646       | 50914       |
| P. juliae           | P. el. cordifolia  | P. ve. columnae     | 0.119             | 19.186         | 0.000          | 0.052           | 108579      | 59951       | 47244       |
| P. juliae           | P. el. cordifolia  | P. ve. macrocalyx   | 0.138             | 20.744         | 0.000          | 0.075           | 109267      | 61671       | 46699       |
| P. juliae           | P. el. cordifolia  | P. ve. veris        | 0.114             | 17.002         | 0.000          | 0.052           | 128631      | 56183       | 44687       |
| P. juliae           | P. el. cordifolia  | P. vu. heterochroma | 0.065             | 8.823          | 0.000          | 0.043           | 74696       | 65260       | 57244       |
| P. juliae           | P. el. elatior     | P. el. pallasii     | 0.040             | 5.485          | 0.000          | 0.017           | 83991       | 72694       | 67161       |
| P. juliae           | P. el. elatior     | P. grandis          | 0.134             | 27.043         | 0.000          | 0.056           | 201189      | 69324       | 52891       |
| P. juliae           | P. el. leucophylla | P. el. elatior      | 0.040             | 6.731          | 0.000          | 0.020           | 96105       | 57151       | 52773       |
| P. juliae           | P. el. leucophylla | P. el. meyeri       | 0.069             | 10.606         | 0.000          | 0.047           | 89165       | 58646       | 51080       |
| P. juliae           | P. el. leucophylla | P. el. meyeri       | 0.049             | 7.769          | 0.000          | 0.029           | 94144       | 55971       | 50773       |
| P. juliae           | P. el. leucophylla | P. el. pseudoelator | 0.107             | 18.994         | 0.000          | 0.063           | 90494       | 62296       | 50217       |
| P. juliae           | P. el. leucophylla | P. grandis          | 0.010             | 2.157          | 0.016          | 0.003           | 237004      | 49270       | 48309       |
| P. juliae           | P. el. leucophylla | P. megaseifolia     | 0.030             | 4.719          | 0.000          | 0.018           | 100424      | 53984       | 50861       |
| P. juliae           | P. el. leucophylla | P. renifolia        | 0.049             | 7.792          | 0.000          | 0.026           | 93784       | 56466       | 51216       |
| P. juliae           | P. el. leucophylla | P. ve. columnae     | 0.106             | 17.628         | 0.000          | 0.047           | 109709      | 59138       | 47808       |
| P. juliae           | P. el. leucophylla | P. ve. macrocalyx   | 0.123             | 19.750         | 0.000          | 0.066           | 110473      | 60568       | 47331       |

| <b>P1</b>       | <b>P2</b>            | <b>P3</b>            | <b>Dstatistic</b> | <b>Z-score</b> | <b>p-value</b> | <b>f4-ratio</b> | <b>BBA</b> | <b>ABBA</b> | <b>BABA</b> |
|-----------------|----------------------|----------------------|-------------------|----------------|----------------|-----------------|------------|-------------|-------------|
| P. juliae       | P. el. leucophylla   | P. ve. veris         | 0.100             | 15.703         | 0.000          | 0.046           | 129858     | 55431       | 45340       |
| P. juliae       | P. el. leucophylla   | P. vu. heterochroma  | 0.064             | 8.670          | 0.000          | 0.042           | 75378      | 65092       | 57211       |
| P. juliae       | P. el. leucophylla   | P. vu. vulgaris      | 0.093             | 12.137         | 0.000          | 0.044           | 83814      | 67230       | 55818       |
| P. juliae       | P. el. meyeri        | P. grandis           | 0.191             | 41.430         | 0.000          | 0.077           | 199909     | 69612       | 47284       |
| P. juliae       | P. el. meyeri        | P. grandis           | 0.185             | 36.889         | 0.000          | 0.078           | 195058     | 71101       | 48860       |
| P. juliae       | P. el. meyeri        | P. ve. columnae      | 0.018             | 2.465          | 0.007          | 0.009           | 84719      | 62865       | 60672       |
| P. juliae       | P. el. meyeri        | P. ve. macrocalyx    | 0.024             | 3.445          | 0.000          | 0.015           | 85628      | 63434       | 60456       |
| P. juliae       | P. el. meyeri        | P. ve. veris         | 0.022             | 2.934          | 0.002          | 0.012           | 104123     | 59986       | 57365       |
| P. juliae       | P. megaseifolia      | P. el. meyeri        | 0.080             | 12.247         | 0.000          | 0.068           | 51621      | 74387       | 63351       |
| P. juliae       | P. megaseifolia      | P. grandis           | 0.152             | 29.501         | 0.000          | 0.064           | 192220     | 70110       | 51646       |
| P. juliae       | P. renifolia         | P. grandis           | 0.205             | 42.090         | 0.000          | 0.086           | 195618     | 72416       | 47808       |
| P. juliae       | P. ve. veris         | P. el. pseudoelator  | 0.153             | 14.604         | 0.000          | 0.148           | 36818      | 110247      | 81014       |
| P. juliae       | P. vu. heterochroma  | P. el. elatior       | 0.001             | 0.115          | 0.454          | 0.000           | 85812      | 60516       | 60442       |
| P. juliae       | P. vu. heterochroma  | P. el. pseudoelator  | 0.016             | 2.820          | 0.002          | 0.010           | 82011      | 61334       | 59452       |
| P. juliae       | P. vu. heterochroma  | P. megaseifolia      | 0.010             | 1.806          | 0.035          | 0.006           | 88982      | 58216       | 57090       |
| P. juliae       | P. vu. heterochroma  | P. ve. columnae      | 0.015             | 2.740          | 0.003          | 0.007           | 100821     | 58139       | 56459       |
| P. juliae       | P. vu. heterochroma  | P. ve. macrocalyx    | 0.012             | 2.167          | 0.015          | 0.007           | 102171     | 57927       | 56572       |
| P. juliae       | P. vu. heterochroma  | P. ve. veris         | 0.015             | 2.609          | 0.005          | 0.007           | 120876     | 55276       | 53663       |
| P. juliae       | P. vu. sibthorpii GE | P. el. elatior       | 0.012             | 2.215          | 0.013          | 0.006           | 86106      | 60520       | 59080       |
| P. juliae       | P. vu. sibthorpii GE | P. el. meyeri        | 0.012             | 2.325          | 0.010          | 0.009           | 80063      | 59636       | 58213       |
| P. juliae       | P. vu. sibthorpii GE | P. el. meyeri        | 0.005             | 0.903          | 0.183          | 0.003           | 84556      | 57747       | 57188       |
| P. juliae       | P. vu. sibthorpii GE | P. el. pseudoelator  | 0.057             | 9.906          | 0.000          | 0.035           | 80993      | 63711       | 56803       |
| P. juliae       | P. vu. sibthorpii GE | P. megaseifolia      | 0.016             | 2.809          | 0.002          | 0.010           | 89561      | 57831       | 56002       |
| P. juliae       | P. vu. sibthorpii GE | P. renifolia         | 0.002             | 0.407          | 0.342          | 0.001           | 84284      | 58031       | 57770       |
| P. juliae       | P. vu. sibthorpii GE | P. ve. columnae      | 0.050             | 8.747          | 0.000          | 0.023           | 99957      | 59737       | 54088       |
| P. juliae       | P. vu. sibthorpii GE | P. ve. macrocalyx    | 0.046             | 7.912          | 0.000          | 0.026           | 101237     | 59465       | 54192       |
| P. juliae       | P. vu. sibthorpii GE | P. ve. veris         | 0.052             | 8.505          | 0.000          | 0.026           | 119781     | 56887       | 51263       |
| P. juliae       | P. vu. sibthorpii TR | P. el. elatior       | 0.003             | 0.474          | 0.318          | 0.001           | 87055      | 63161       | 62826       |
| P. juliae       | P. vu. sibthorpii TR | P. el. pseudoelator  | 0.006             | 1.112          | 0.133          | 0.004           | 83165      | 62417       | 61615       |
| P. juliae       | P. vu. sibthorpii TR | P. ve. columnae      | 0.007             | 1.212          | 0.113          | 0.004           | 102402     | 59701       | 58813       |
| P. juliae       | P. vu. vulgaris      | P. el. elatior       | 0.001             | 0.126          | 0.450          | 0.000           | 83601      | 68173       | 68063       |
| P. juliae       | P. vu. vulgaris      | P. ve. veris         | 0.001             | 0.093          | 0.463          | 0.000           | 118598     | 60564       | 60483       |
| P. megaseifolia | P. el. elatior       | P. el. lothousei     | 0.112             | 13.571         | 0.000          | 0.040           | 90466      | 71518       | 57139       |
| P. megaseifolia | P. el. elatior       | P. el. pallasii      | 0.070             | 9.895          | 0.000          | 0.026           | 90511      | 69407       | 60376       |
| P. megaseifolia | P. el. elatior       | P. el. pseudoelator  | 0.086             | 17.940         | 0.000          | 0.047           | 82819      | 64958       | 54650       |
| P. megaseifolia | P. el. elatior       | P. juliae            | 0.056             | 10.213         | 0.000          | 0.023           | 74087      | 64563       | 57769       |
| P. megaseifolia | P. el. elatior       | P. ve. columnae      | 0.103             | 20.530         | 0.000          | 0.044           | 100472     | 63802       | 51893       |
| P. megaseifolia | P. el. elatior       | P. ve. macrocalyx    | 0.107             | 21.878         | 0.000          | 0.055           | 101375     | 64140       | 51784       |
| P. megaseifolia | P. el. elatior       | P. ve. veris         | 0.122             | 24.587         | 0.000          | 0.056           | 120351     | 62599       | 49024       |
| P. megaseifolia | P. el. elatior       | P. vu. heterochroma  | 0.046             | 8.987          | 0.000          | 0.026           | 75454      | 65795       | 59999       |
| P. megaseifolia | P. el. elatior       | P. vu. sibthorpii GE | 0.051             | 10.064         | 0.000          | 0.028           | 74491      | 66252       | 59785       |
| P. megaseifolia | P. el. meyeri        | P. el. cordifolia    | 0.071             | 14.113         | 0.000          | 0.026           | 72061      | 61326       | 53196       |
| P. megaseifolia | P. el. meyeri        | P. el. leucophylla   | 0.071             | 14.007         | 0.000          | 0.025           | 72265      | 61374       | 53275       |

| <b>P1</b>       | <b>P2</b>            | <b>P3</b>            | <b>Dstatistic</b> | <b>Z-score</b> | <b>p-value</b> | <b>f4-ratio</b> | <b>BBAA</b> | <b>ABBA</b> | <b>BABA</b> |
|-----------------|----------------------|----------------------|-------------------|----------------|----------------|-----------------|-------------|-------------|-------------|
| P. megaseifolia | P. el. meyeri        | P. el. pseudoelator  | 0.112             | 21.717         | 0.000          | 0.057           | 83146       | 62061       | 49608       |
| P. megaseifolia | P. el. meyeri        | P. grandis           | 0.034             | 7.900          | 0.000          | 0.014           | 199290      | 56881       | 53165       |
| P. megaseifolia | P. el. meyeri        | P. grandis           | 0.035             | 8.457          | 0.000          | 0.014           | 198121      | 56958       | 53072       |
| P. megaseifolia | P. el. meyeri        | P. juliae            | 0.053             | 10.058         | 0.000          | 0.021           | 75792       | 59626       | 53640       |
| P. megaseifolia | P. el. meyeri        | P. ve. columnae      | 0.189             | 33.998         | 0.000          | 0.078           | 99019       | 65229       | 44538       |
| P. megaseifolia | P. el. meyeri        | P. ve. columnae      | 0.139             | 25.559         | 0.000          | 0.057           | 99954       | 61876       | 46775       |
| P. megaseifolia | P. el. meyeri        | P. ve. macrocalyx    | 0.194             | 37.184         | 0.000          | 0.096           | 99803       | 65653       | 44325       |
| P. megaseifolia | P. el. meyeri        | P. ve. macrocalyx    | 0.141             | 26.375         | 0.000          | 0.070           | 100961      | 62078       | 46760       |
| P. megaseifolia | P. el. meyeri        | P. ve. veris         | 0.195             | 33.909         | 0.000          | 0.085           | 119047      | 62524       | 42127       |
| P. megaseifolia | P. el. meyeri        | P. ve. veris         | 0.158             | 27.726         | 0.000          | 0.069           | 119349      | 60586       | 44030       |
| P. megaseifolia | P. el. meyeri        | P. vu. heterochroma  | 0.083             | 15.318         | 0.000          | 0.044           | 75824       | 63666       | 53914       |
| P. megaseifolia | P. el. meyeri        | P. vu. heterochroma  | 0.036             | 6.850          | 0.000          | 0.019           | 77092       | 60014       | 55829       |
| P. megaseifolia | P. el. meyeri        | P. vu. sibthorpii GE | 0.041             | 7.370          | 0.000          | 0.021           | 76082       | 60323       | 55579       |
| P. megaseifolia | P. el. meyeri        | P. vu. sibthorpii TR | 0.096             | 17.020         | 0.000          | 0.044           | 80081       | 65208       | 53753       |
| P. megaseifolia | P. el. meyeri        | P. vu. sibthorpii TR | 0.041             | 7.528          | 0.000          | 0.019           | 81699       | 60891       | 56056       |
| P. megaseifolia | P. el. meyeri        | P. vu. vulgaris      | 0.119             | 21.471         | 0.000          | 0.047           | 85899       | 66138       | 52093       |
| P. megaseifolia | P. el. meyeri        | P. vu. vulgaris      | 0.059             | 10.719         | 0.000          | 0.023           | 87610       | 61339       | 54531       |
| P. megaseifolia | P. el. pseudoelator  | P. juliae            | 0.066             | 7.981          | 0.000          | 0.033           | 57248       | 77606       | 68058       |
| P. megaseifolia | P. el. pseudoelator  | P. vu. heterochroma  | 0.067             | 9.514          | 0.000          | 0.045           | 57236       | 79771       | 69736       |
| P. megaseifolia | P. el. pseudoelator  | P. vu. sibthorpii GE | 0.095             | 12.125         | 0.000          | 0.062           | 55317       | 82831       | 68432       |
| P. megaseifolia | P. juliae            | P. el. lofthousei    | 0.033             | 5.127          | 0.000          | 0.012           | 79269       | 66537       | 62229       |
| P. megaseifolia | P. juliae            | P. el. pallasii      | 0.027             | 4.477          | 0.000          | 0.011           | 78294       | 68334       | 64759       |
| P. megaseifolia | P. juliae            | P. ve. veris         | 0.143             | 22.149         | 0.000          | 0.074           | 104506      | 70025       | 52546       |
| P. megaseifolia | P. renifolia         | P. el. leucophylla   | 0.082             | 16.477         | 0.000          | 0.028           | 73002       | 61715       | 52374       |
| P. megaseifolia | P. renifolia         | P. el. pseudoelator  | 0.110             | 21.222         | 0.000          | 0.056           | 84515       | 61480       | 49275       |
| P. megaseifolia | P. renifolia         | P. grandis           | 0.057             | 13.220         | 0.000          | 0.023           | 198863      | 58076       | 51814       |
| P. megaseifolia | P. renifolia         | P. juliae            | 0.063             | 11.170         | 0.000          | 0.024           | 76537       | 59989       | 52865       |
| P. megaseifolia | P. renifolia         | P. ve. columnae      | 0.124             | 22.010         | 0.000          | 0.050           | 102056      | 60048       | 46821       |
| P. megaseifolia | P. renifolia         | P. ve. macrocalyx    | 0.127             | 23.761         | 0.000          | 0.062           | 102948      | 60347       | 46701       |
| P. megaseifolia | P. renifolia         | P. ve. veris         | 0.128             | 22.290         | 0.000          | 0.055           | 122183      | 57637       | 44556       |
| P. megaseifolia | P. renifolia         | P. vu. heterochroma  | 0.042             | 7.916          | 0.000          | 0.022           | 78085       | 60057       | 55210       |
| P. megaseifolia | P. renifolia         | P. vu. sibthorpii GE | 0.048             | 8.529          | 0.000          | 0.024           | 76987       | 60457       | 54890       |
| P. megaseifolia | P. renifolia         | P. vu. sibthorpii TR | 0.051             | 9.284          | 0.000          | 0.023           | 82406       | 61093       | 55138       |
| P. megaseifolia | P. renifolia         | P. vu. vulgaris      | 0.068             | 12.623         | 0.000          | 0.026           | 88441       | 61485       | 53678       |
| P. megaseifolia | P. ve. veris         | P. el. pseudoelator  | 0.245             | 26.232         | 0.000          | 0.226           | 34851       | 126713      | 76897       |
| P. megaseifolia | P. vu. heterochroma  | P. el. lofthousei    | 0.019             | 3.050          | 0.001          | 0.007           | 82495       | 66620       | 64132       |
| P. megaseifolia | P. vu. heterochroma  | P. el. pallasii      | 0.017             | 2.902          | 0.002          | 0.007           | 81465       | 69015       | 66660       |
| P. megaseifolia | P. vu. heterochroma  | P. ve. veris         | 0.155             | 25.035         | 0.000          | 0.080           | 107585      | 71958       | 52625       |
| P. megaseifolia | P. vu. sibthorpii TR | P. ve. veris         | 0.135             | 21.817         | 0.000          | 0.073           | 107591      | 73965       | 56340       |
| P. megaseifolia | P. vu. vulgaris      | P. ve. veris         | 0.129             | 18.393         | 0.000          | 0.074           | 104367      | 78320       | 60473       |
| P. renifolia    | P. el. cordifolia    | P. el. lofthousei    | 0.016             | 2.930          | 0.002          | 0.005           | 90570       | 59829       | 57929       |
| P. renifolia    | P. el. cordifolia    | P. el. pallasii      | 0.015             | 2.677          | 0.004          | 0.005           | 89449       | 61721       | 59937       |
| P. renifolia    | P. el. cordifolia    | P. ve. veris         | 0.138             | 21.183         | 0.000          | 0.072           | 103908      | 66899       | 50710       |

| <b>P1</b>    | <b>P2</b>            | <b>P3</b>            | <b>Dstatistic</b> | <b>Z-score</b> | <b>p-value</b> | <b>f4-ratio</b> | <b>BBAA</b> | <b>ABBA</b> | <b>BABA</b> |
|--------------|----------------------|----------------------|-------------------|----------------|----------------|-----------------|-------------|-------------|-------------|
| P. renifolia | P. el. elatior       | P. el. lofthousei    | 0.160             | 17.488         | 0.000          | 0.048           | 118612      | 63305       | 45859       |
| P. renifolia | P. el. elatior       | P. el. meyeri        | 0.035             | 3.911          | 0.000          | 0.037           | 53511       | 64992       | 60581       |
| P. renifolia | P. el. elatior       | P. el. pallasii      | 0.112             | 15.274         | 0.000          | 0.035           | 119089      | 60779       | 48520       |
| P. renifolia | P. el. elatior       | P. ve. veris         | 0.005             | 0.799          | 0.212          | 0.002           | 142881      | 47060       | 46638       |
| P. renifolia | P. el. elatior       | P. vu. heterochroma  | 0.009             | 1.989          | 0.023          | 0.004           | 99894       | 52718       | 51762       |
| P. renifolia | P. el. elatior       | P. vu. sibthorpii GE | 0.009             | 1.715          | 0.043          | 0.004           | 98428       | 52753       | 51843       |
| P. renifolia | P. el. elatior       | P. vu. sibthorpii TR | 0.041             | 9.278          | 0.000          | 0.017           | 103181      | 55976       | 51525       |
| P. renifolia | P. el. elatior       | P. vu. vulgaris      | 0.090             | 20.114         | 0.000          | 0.034           | 107751      | 60261       | 50338       |
| P. renifolia | P. el. leucophylla   | P. el. lofthousei    | 0.012             | 2.168          | 0.015          | 0.004           | 90836       | 59983       | 58593       |
| P. renifolia | P. el. leucophylla   | P. el. pallasii      | 0.011             | 1.978          | 0.024          | 0.004           | 89683       | 61906       | 60602       |
| P. renifolia | P. el. leucophylla   | P. ve. veris         | 0.125             | 19.469         | 0.000          | 0.065           | 104289      | 66269       | 51549       |
| P. renifolia | P. el. meyeri        | P. el. cordifolia    | 0.069             | 14.741         | 0.000          | 0.021           | 91873       | 51054       | 44501       |
| P. renifolia | P. el. meyeri        | P. el. leucophylla   | 0.071             | 15.023         | 0.000          | 0.021           | 91836       | 51201       | 44391       |
| P. renifolia | P. el. meyeri        | P. el. lofthousei    | 0.025             | 4.432          | 0.000          | 0.005           | 164841      | 38237       | 36338       |
| P. renifolia | P. el. meyeri        | P. el. pallasii      | 0.002             | 0.403          | 0.343          | 0.000           | 122984      | 45979       | 45823       |
| P. renifolia | P. el. meyeri        | P. el. pallasii      | 0.021             | 3.625          | 0.000          | 0.005           | 165729      | 39414       | 37809       |
| P. renifolia | P. el. meyeri        | P. el. pseudoelatior | 0.077             | 15.564         | 0.000          | 0.035           | 102819      | 50242       | 43041       |
| P. renifolia | P. el. meyeri        | P. el. pseudoelatior | 0.004             | 0.788          | 0.215          | 0.001           | 148661      | 38237       | 37941       |
| P. renifolia | P. el. meyeri        | P. juliae            | 0.050             | 10.366         | 0.000          | 0.016           | 97363       | 49186       | 44512       |
| P. renifolia | P. el. meyeri        | P. ve. columnae      | 0.083             | 17.014         | 0.000          | 0.029           | 120334      | 48646       | 41206       |
| P. renifolia | P. el. meyeri        | P. ve. columnae      | 0.026             | 4.608          | 0.000          | 0.008           | 166077      | 38048       | 36095       |
| P. renifolia | P. el. meyeri        | P. ve. macrocalyx    | 0.085             | 18.448         | 0.000          | 0.037           | 121088      | 48866       | 41219       |
| P. renifolia | P. el. meyeri        | P. ve. macrocalyx    | 0.024             | 4.238          | 0.000          | 0.008           | 167253      | 38082       | 36321       |
| P. renifolia | P. el. meyeri        | P. ve. veris         | 0.085             | 16.740         | 0.000          | 0.032           | 141155      | 46389       | 39099       |
| P. renifolia | P. el. meyeri        | P. ve. veris         | 0.050             | 8.466          | 0.000          | 0.016           | 186830      | 37511       | 33959       |
| P. renifolia | P. el. meyeri        | P. vu. heterochroma  | 0.052             | 11.247         | 0.000          | 0.023           | 99944       | 50139       | 45181       |
| P. renifolia | P. el. meyeri        | P. vu. sibthorpii GE | 0.061             | 12.331         | 0.000          | 0.026           | 98122       | 50738       | 44888       |
| P. renifolia | P. el. meyeri        | P. vu. sibthorpii TR | 0.058             | 12.390         | 0.000          | 0.022           | 103737      | 50973       | 45427       |
| P. renifolia | P. el. meyeri        | P. vu. vulgaris      | 0.065             | 14.048         | 0.000          | 0.021           | 109053      | 51345       | 45044       |
| P. renifolia | P. el. pseudoelatior | P. el. cordifolia    | 0.064             | 7.160          | 0.000          | 0.030           | 55133       | 76119       | 66989       |
| P. renifolia | P. el. pseudoelatior | P. el. leucophylla   | 0.063             | 7.085          | 0.000          | 0.028           | 55680       | 76125       | 67119       |
| P. renifolia | P. el. pseudoelatior | P. juliae            | 0.018             | 2.128          | 0.017          | 0.009           | 61729       | 70064       | 67602       |
| P. renifolia | P. el. pseudoelatior | P. vu. heterochroma  | 0.037             | 4.616          | 0.000          | 0.024           | 62609       | 72893       | 67743       |
| P. renifolia | P. juliae            | P. el. lofthousei    | 0.058             | 10.028         | 0.000          | 0.020           | 85132       | 65391       | 58232       |
| P. renifolia | P. juliae            | P. el. pallasii      | 0.051             | 9.534          | 0.000          | 0.019           | 84133       | 67094       | 60545       |
| P. renifolia | P. juliae            | P. ve. columnae      | 0.041             | 6.018          | 0.000          | 0.021           | 84640       | 65390       | 60236       |
| P. renifolia | P. juliae            | P. ve. macrocalyx    | 0.037             | 5.471          | 0.000          | 0.022           | 85576       | 65211       | 60599       |
| P. renifolia | P. juliae            | P. ve. veris         | 0.039             | 5.275          | 0.000          | 0.021           | 103929      | 62049       | 57444       |
| P. renifolia | P. megaseifolia      | P. el. lofthousei    | 0.027             | 5.170          | 0.000          | 0.008           | 96075       | 55506       | 52565       |
| P. renifolia | P. megaseifolia      | P. el. pallasii      | 0.028             | 5.311          | 0.000          | 0.009           | 95145       | 57639       | 54545       |
| P. renifolia | P. ve. veris         | P. el. pseudoelatior | 0.192             | 18.995         | 0.000          | 0.179           | 36832       | 115693      | 78449       |
| P. renifolia | P. vu. heterochroma  | P. el. lofthousei    | 0.043             | 7.395          | 0.000          | 0.015           | 86716       | 66031       | 60615       |
| P. renifolia | P. vu. heterochroma  | P. el. pallasii      | 0.041             | 7.127          | 0.000          | 0.016           | 85725       | 68416       | 62992       |

| <b>P1</b>       | <b>P2</b>            | <b>P3</b>           | <b>Dstatistic</b> | <b>Z-score</b> | <b>p-value</b> | <b>f4-ratio</b> | <b>BBAA</b> | <b>ABBA</b> | <b>BABA</b> |
|-----------------|----------------------|---------------------|-------------------|----------------|----------------|-----------------|-------------|-------------|-------------|
| P. renifolia    | P. vu. heterochroma  | P. ve. columnae     | 0.053             | 7.447          | 0.000          | 0.027           | 85264       | 67895       | 61010       |
| P. renifolia    | P. vu. heterochroma  | P. ve. macrocalyx   | 0.047             | 6.722          | 0.000          | 0.029           | 86322       | 67485       | 61468       |
| P. renifolia    | P. vu. heterochroma  | P. ve. veris        | 0.051             | 6.864          | 0.000          | 0.028           | 105170      | 64454       | 58186       |
| P. renifolia    | P. vu. sibthorpii GE | P. el. lofthousei   | 0.016             | 2.840          | 0.002          | 0.005           | 88509       | 63026       | 61081       |
| P. renifolia    | P. vu. sibthorpii GE | P. el. pallasii     | 0.016             | 2.821          | 0.002          | 0.006           | 87448       | 65351       | 63351       |
| P. renifolia    | P. vu. sibthorpii GE | P. ve. columnae     | 0.085             | 12.732         | 0.000          | 0.043           | 84253       | 69670       | 58810       |
| P. renifolia    | P. vu. sibthorpii GE | P. ve. macrocalyx   | 0.078             | 12.123         | 0.000          | 0.048           | 85261       | 69202       | 59241       |
| P. renifolia    | P. vu. sibthorpii GE | P. ve. veris        | 0.084             | 12.372         | 0.000          | 0.045           | 103954      | 66208       | 55928       |
| P. renifolia    | P. vu. sibthorpii TR | P. ve. columnae     | 0.045             | 6.630          | 0.000          | 0.024           | 85259       | 69949       | 63893       |
| P. renifolia    | P. vu. sibthorpii TR | P. ve. macrocalyx   | 0.030             | 4.582          | 0.000          | 0.019           | 86538       | 68516       | 64567       |
| P. renifolia    | P. vu. sibthorpii TR | P. ve. veris        | 0.036             | 5.163          | 0.000          | 0.020           | 105612      | 65765       | 61256       |
| P. renifolia    | P. vu. vulgaris      | P. el. pseudoelator | 0.020             | 2.924          | 0.002          | 0.014           | 67290       | 73813       | 70870       |
| P. renifolia    | P. vu. vulgaris      | P. ve. columnae     | 0.012             | 1.593          | 0.056          | 0.006           | 84575       | 70409       | 68768       |
| P. renifolia    | P. vu. vulgaris      | P. ve. macrocalyx   | 0.004             | 0.576          | 0.282          | 0.003           | 85603       | 69787       | 69221       |
| P. renifolia    | P. vu. vulgaris      | P. ve. veris        | 0.035             | 4.633          | 0.000          | 0.021           | 103742      | 69614       | 64917       |
| P. ve. columnae | P. el. cordifolia    | P. grandis          | 0.268             | 29.263         | 0.000          | 0.103           | 219404      | 79284       | 45818       |
| P. ve. columnae | P. el. elatior       | P. el. cordifolia   | 0.075             | 7.159          | 0.000          | 0.037           | 54570       | 86270       | 74183       |
| P. ve. columnae | P. el. elatior       | P. el. leucophylla  | 0.081             | 8.049          | 0.000          | 0.038           | 55334       | 86569       | 73533       |
| P. ve. columnae | P. el. elatior       | P. grandis          | 0.346             | 40.789         | 0.000          | 0.150           | 202482      | 96507       | 46932       |
| P. ve. columnae | P. el. leucophylla   | P. grandis          | 0.260             | 28.542         | 0.000          | 0.102           | 217312      | 79326       | 46616       |
| P. ve. columnae | P. el. lofthousei    | P. el. elatior      | 0.087             | 10.908         | 0.000          | 0.067           | 51576       | 104172      | 87528       |
| P. ve. columnae | P. el. lofthousei    | P. grandis          | 0.140             | 15.513         | 0.000          | 0.070           | 182572      | 89531       | 67607       |
| P. ve. columnae | P. el. lofthousei    | P. megaseifolia     | 0.076             | 7.887          | 0.000          | 0.063           | 55542       | 92677       | 79655       |
| P. ve. columnae | P. el. meyeri        | P. el. cordifolia   | 0.072             | 7.117          | 0.000          | 0.034           | 55099       | 82110       | 71058       |
| P. ve. columnae | P. el. meyeri        | P. el. leucophylla  | 0.080             | 8.174          | 0.000          | 0.036           | 55837       | 82629       | 70418       |
| P. ve. columnae | P. el. pallasii      | P. el. elatior      | 0.081             | 10.016         | 0.000          | 0.061           | 53484       | 103137      | 87658       |
| P. ve. columnae | P. el. pallasii      | P. el. meyeri       | 0.003             | 0.329          | 0.371          | 0.003           | 51933       | 89528       | 89015       |
| P. ve. columnae | P. el. pallasii      | P. grandis          | 0.158             | 18.046         | 0.000          | 0.077           | 187458      | 92318       | 67193       |
| P. ve. columnae | P. el. pallasii      | P. juliae           | 0.011             | 1.276          | 0.101          | 0.007           | 49831       | 91930       | 89950       |
| P. ve. columnae | P. el. pallasii      | P. megaseifolia     | 0.099             | 10.790         | 0.000          | 0.081           | 56653       | 96148       | 78787       |
| P. ve. columnae | P. el. pallasii      | P. renifolia        | 0.007             | 0.700          | 0.242          | 0.005           | 52829       | 89416       | 88168       |
| P. ve. columnae | P. el. pseudoelator  | P. el. cordifolia   | 0.211             | 24.297         | 0.000          | 0.068           | 121775      | 62704       | 40862       |
| P. ve. columnae | P. el. pseudoelator  | P. el. elatior      | 0.194             | 24.837         | 0.000          | 0.073           | 140973      | 57991       | 39181       |
| P. ve. columnae | P. el. pseudoelator  | P. el. leucophylla  | 0.219             | 25.341         | 0.000          | 0.067           | 122156      | 63131       | 40426       |
| P. ve. columnae | P. el. pseudoelator  | P. el. lofthousei   | 0.212             | 28.364         | 0.000          | 0.047           | 169551      | 53884       | 35045       |
| P. ve. columnae | P. el. pseudoelator  | P. el. meyeri       | 0.194             | 24.651         | 0.000          | 0.099           | 131306      | 58025       | 39201       |
| P. ve. columnae | P. el. pseudoelator  | P. el. meyeri       | 0.179             | 24.292         | 0.000          | 0.082           | 135874      | 55997       | 38992       |
| P. ve. columnae | P. el. pseudoelator  | P. el. pallasii     | 0.223             | 31.231         | 0.000          | 0.054           | 170288      | 56206       | 35743       |
| P. ve. columnae | P. el. pseudoelator  | P. grandis          | 0.216             | 30.378         | 0.000          | 0.058           | 290291      | 53581       | 34547       |
| P. ve. columnae | P. el. pseudoelator  | P. juliae           | 0.220             | 29.947         | 0.000          | 0.071           | 131347      | 59750       | 38201       |
| P. ve. columnae | P. el. pseudoelator  | P. megaseifolia     | 0.215             | 28.493         | 0.000          | 0.092           | 148708      | 56021       | 36218       |
| P. ve. columnae | P. el. pseudoelator  | P. renifolia        | 0.199             | 25.181         | 0.000          | 0.081           | 137539      | 57130       | 38166       |
| P. ve. columnae | P. el. pseudoelator  | P. vu. heterochroma | 0.224             | 30.552         | 0.000          | 0.095           | 131733      | 61428       | 38984       |

| <b>P1</b>         | <b>P2</b>            | <b>P3</b>            | <b>Dstatistic</b> | <b>Z-score</b> | <b>p-value</b> | <b>f4-ratio</b> | <b>BBAA</b> | <b>ABBA</b> | <b>BABA</b> |
|-------------------|----------------------|----------------------|-------------------|----------------|----------------|-----------------|-------------|-------------|-------------|
| P. ve. columnnae  | P. el. pseudoelator  | P. vu. sibthorpii GE | 0.229             | 32.227         | 0.000          | 0.096           | 127846      | 62700       | 39314       |
| P. ve. columnnae  | P. el. pseudoelator  | P. vu. sibthorpii TR | 0.218             | 28.048         | 0.000          | 0.083           | 134309      | 62624       | 40208       |
| P. ve. columnnae  | P. el. pseudoelator  | P. vu. vulgaris      | 0.202             | 25.550         | 0.000          | 0.067           | 139251      | 61217       | 40625       |
| P. ve. columnnae  | P. juliae            | P. grandis           | 0.236             | 26.032         | 0.000          | 0.097           | 210103      | 81242       | 50178       |
| P. ve. columnnae  | P. megaseifolia      | P. el. cordifolia    | 0.018             | 1.815          | 0.035          | 0.009           | 49531       | 83761       | 80748       |
| P. ve. columnnae  | P. megaseifolia      | P. el. leucophylla   | 0.026             | 2.656          | 0.004          | 0.013           | 50327       | 84273       | 80014       |
| P. ve. columnnae  | P. megaseifolia      | P. juliae            | 0.075             | 8.910          | 0.000          | 0.039           | 55249       | 85428       | 73440       |
| P. ve. columnnae  | P. megaseifolia      | P. vu. heterochroma  | 0.076             | 9.768          | 0.000          | 0.053           | 55263       | 87828       | 75367       |
| P. ve. columnnae  | P. megaseifolia      | P. vu. sibthorpii GE | 0.055             | 6.599          | 0.000          | 0.037           | 53560       | 86567       | 77617       |
| P. ve. columnnae  | P. megaseifolia      | P. vu. sibthorpii TR | 0.056             | 6.746          | 0.000          | 0.035           | 58864       | 87495       | 78215       |
| P. ve. columnnae  | P. megaseifolia      | P. vu. vulgaris      | 0.038             | 4.431          | 0.000          | 0.020           | 64179       | 85439       | 79151       |
| P. ve. columnnae  | P. renifolia         | P. el. cordifolia    | 0.082             | 8.199          | 0.000          | 0.040           | 53425       | 84202       | 71405       |
| P. ve. columnnae  | P. renifolia         | P. el. leucophylla   | 0.089             | 9.106          | 0.000          | 0.041           | 54227       | 84545       | 70774       |
| P. ve. columnnae  | P. ve. macrocalyx    | P. el. cordifolia    | 0.019             | 2.919          | 0.002          | 0.004           | 185185      | 36042       | 34718       |
| P. ve. columnnae  | P. ve. macrocalyx    | P. el. leucophylla   | 0.014             | 2.164          | 0.015          | 0.003           | 185718      | 35785       | 34819       |
| P. ve. columnnae  | P. ve. macrocalyx    | P. ve. veris         | 0.013             | 1.308          | 0.095          | 0.014           | 92057       | 45993       | 44821       |
| P. ve. columnnae  | P. vu. heterochroma  | P. grandis           | 0.222             | 24.934         | 0.000          | 0.090           | 214844      | 81100       | 51653       |
| P. ve. columnnae  | P. vu. sibthorpii GE | P. grandis           | 0.225             | 25.490         | 0.000          | 0.089           | 217447      | 79659       | 50444       |
| P. ve. columnnae  | P. vu. sibthorpii TR | P. grandis           | 0.179             | 19.115         | 0.000          | 0.074           | 218670      | 80229       | 55811       |
| P. ve. columnnae  | P. vu. vulgaris      | P. grandis           | 0.129             | 12.306         | 0.000          | 0.054           | 219468      | 78859       | 60888       |
| P. ve. macrocalyx | P. el. cordifolia    | P. grandis           | 0.275             | 29.183         | 0.000          | 0.105           | 221465      | 79763       | 45376       |
| P. ve. macrocalyx | P. el. elatior       | P. el. cordifolia    | 0.067             | 5.861          | 0.000          | 0.033           | 54440       | 86682       | 75770       |
| P. ve. macrocalyx | P. el. elatior       | P. el. leucophylla   | 0.076             | 6.991          | 0.000          | 0.036           | 55268       | 87050       | 74828       |
| P. ve. macrocalyx | P. el. elatior       | P. grandis           | 0.351             | 40.478         | 0.000          | 0.152           | 203231      | 97466       | 46839       |
| P. ve. macrocalyx | P. el. leucophylla   | P. grandis           | 0.267             | 28.422         | 0.000          | 0.105           | 219033      | 79828       | 46196       |
| P. ve. macrocalyx | P. el. lofthousei    | P. el. elatior       | 0.089             | 10.884         | 0.000          | 0.069           | 51626       | 105101      | 87952       |
| P. ve. macrocalyx | P. el. lofthousei    | P. grandis           | 0.145             | 15.500         | 0.000          | 0.073           | 183033      | 90453       | 67592       |
| P. ve. macrocalyx | P. el. lofthousei    | P. megaseifolia      | 0.080             | 8.141          | 0.000          | 0.066           | 55731       | 93603       | 79752       |
| P. ve. macrocalyx | P. el. meyeri        | P. el. cordifolia    | 0.063             | 5.725          | 0.000          | 0.031           | 54800       | 82553       | 72704       |
| P. ve. macrocalyx | P. el. meyeri        | P. el. leucophylla   | 0.073             | 7.066          | 0.000          | 0.034           | 55600       | 83123       | 71749       |
| P. ve. macrocalyx | P. el. pallasii      | P. el. elatior       | 0.083             | 10.048         | 0.000          | 0.062           | 53469       | 104138      | 88111       |
| P. ve. macrocalyx | P. el. pallasii      | P. el. meyeri        | 0.007             | 0.735          | 0.231          | 0.006           | 51997       | 90530       | 89353       |
| P. ve. macrocalyx | P. el. pallasii      | P. grandis           | 0.163             | 17.970         | 0.000          | 0.080           | 187889      | 93331       | 67224       |
| P. ve. macrocalyx | P. el. pallasii      | P. juliae            | 0.017             | 1.899          | 0.029          | 0.010           | 49977       | 93004       | 89978       |
| P. ve. macrocalyx | P. el. pallasii      | P. megaseifolia      | 0.104             | 11.034         | 0.000          | 0.085           | 56793       | 97198       | 78950       |
| P. ve. macrocalyx | P. el. pallasii      | P. renifolia         | 0.010             | 0.942          | 0.173          | 0.007           | 52848       | 90357       | 88629       |
| P. ve. macrocalyx | P. el. pallasii      | P. vu. heterochroma  | 0.007             | 0.914          | 0.180          | 0.005           | 51332       | 94503       | 93219       |
| P. ve. macrocalyx | P. el. pseudoelator  | P. el. cordifolia    | 0.186             | 19.384         | 0.000          | 0.064           | 108759      | 65598       | 44995       |
| P. ve. macrocalyx | P. el. pseudoelator  | P. el. elatior       | 0.188             | 23.879         | 0.000          | 0.075           | 127889      | 61087       | 41789       |
| P. ve. macrocalyx | P. el. pseudoelator  | P. el. leucophylla   | 0.198             | 21.512         | 0.000          | 0.064           | 109446      | 66127       | 44296       |
| P. ve. macrocalyx | P. el. pseudoelator  | P. el. lofthousei    | 0.208             | 28.353         | 0.000          | 0.049           | 156954      | 56666       | 37188       |
| P. ve. macrocalyx | P. el. pseudoelator  | P. el. meyeri        | 0.186             | 23.390         | 0.000          | 0.100           | 118259      | 61018       | 41903       |
| P. ve. macrocalyx | P. el. pseudoelator  | P. el. meyeri        | 0.176             | 24.728         | 0.000          | 0.085           | 122970      | 59017       | 41324       |

| <b>P1</b>         | <b>P2</b>            | <b>P3</b>            | <b>Dstatistic</b> | <b>Z-score</b> | <b>p-value</b> | <b>f4-ratio</b> | <b>BBAA</b> | <b>ABBA</b> | <b>BABA</b> |
|-------------------|----------------------|----------------------|-------------------|----------------|----------------|-----------------|-------------|-------------|-------------|
| P. ve. macrocalyx | P. el. pseudoelator  | P. el. pallasii      | 0.219             | 31.079         | 0.000          | 0.055           | 157358      | 59122       | 37859       |
| P. ve. macrocalyx | P. el. pseudoelator  | P. grandis           | 0.214             | 29.497         | 0.000          | 0.061           | 277475      | 56474       | 36545       |
| P. ve. macrocalyx | P. el. pseudoelator  | P. juliae            | 0.218             | 28.967         | 0.000          | 0.074           | 118885      | 63150       | 40511       |
| P. ve. macrocalyx | P. el. pseudoelator  | P. megaseifolia      | 0.212             | 28.364         | 0.000          | 0.096           | 135770      | 58992       | 38342       |
| P. ve. macrocalyx | P. el. pseudoelator  | P. renifolia         | 0.194             | 24.632         | 0.000          | 0.083           | 124465      | 60100       | 40600       |
| P. ve. macrocalyx | P. el. pseudoelator  | P. vu. heterochroma  | 0.225             | 30.982         | 0.000          | 0.100           | 119203      | 64988       | 41137       |
| P. ve. macrocalyx | P. el. pseudoelator  | P. vu. sibthorpii GE | 0.230             | 32.819         | 0.000          | 0.101           | 115373      | 66263       | 41440       |
| P. ve. macrocalyx | P. el. pseudoelator  | P. vu. sibthorpii TR | 0.233             | 33.879         | 0.000          | 0.092           | 121946      | 66424       | 41355       |
| P. ve. macrocalyx | P. el. pseudoelator  | P. vu. vulgaris      | 0.207             | 26.981         | 0.000          | 0.071           | 126553      | 64693       | 42501       |
| P. ve. macrocalyx | P. juliae            | P. grandis           | 0.242             | 25.603         | 0.000          | 0.099           | 210392      | 82253       | 50218       |
| P. ve. macrocalyx | P. megaseifolia      | P. el. cordifolia    | 0.011             | 0.989          | 0.161          | 0.006           | 49063       | 84202       | 82400       |
| P. ve. macrocalyx | P. megaseifolia      | P. el. leucophylla   | 0.020             | 1.975          | 0.024          | 0.010           | 49911       | 84777       | 81377       |
| P. ve. macrocalyx | P. megaseifolia      | P. juliae            | 0.082             | 9.421          | 0.000          | 0.043           | 55325       | 86456       | 73357       |
| P. ve. macrocalyx | P. megaseifolia      | P. vu. heterochroma  | 0.085             | 10.614         | 0.000          | 0.058           | 55419       | 88951       | 75075       |
| P. ve. macrocalyx | P. megaseifolia      | P. vu. sibthorpii GE | 0.063             | 7.481          | 0.000          | 0.042           | 53682       | 87635       | 77254       |
| P. ve. macrocalyx | P. megaseifolia      | P. vu. sibthorpii TR | 0.072             | 8.802          | 0.000          | 0.044           | 59268       | 88863       | 76932       |
| P. ve. macrocalyx | P. megaseifolia      | P. vu. vulgaris      | 0.048             | 5.441          | 0.000          | 0.025           | 64381       | 86560       | 78692       |
| P. ve. macrocalyx | P. renifolia         | P. el. cordifolia    | 0.074             | 6.754          | 0.000          | 0.036           | 53193       | 84521       | 72913       |
| P. ve. macrocalyx | P. renifolia         | P. el. leucophylla   | 0.082             | 8.002          | 0.000          | 0.038           | 54067       | 84946       | 72001       |
| P. ve. macrocalyx | P. ve. columnae      | P. el. elatior       | 0.006             | 1.024          | 0.153          | 0.002           | 205763      | 33553       | 33153       |
| P. ve. macrocalyx | P. ve. columnae      | P. el. lofthousei    | 0.009             | 1.582          | 0.057          | 0.001           | 233754      | 30812       | 30249       |
| P. ve. macrocalyx | P. ve. columnae      | P. el. meyeri        | 0.003             | 0.499          | 0.309          | 0.001           | 195394      | 33315       | 33121       |
| P. ve. macrocalyx | P. ve. columnae      | P. el. meyeri        | 0.009             | 1.708          | 0.044          | 0.003           | 199103      | 32789       | 32181       |
| P. ve. macrocalyx | P. ve. columnae      | P. el. pallasii      | 0.011             | 1.990          | 0.023          | 0.002           | 236308      | 31896       | 31179       |
| P. ve. macrocalyx | P. ve. columnae      | P. el. pseudoelator  | 0.176             | 16.500         | 0.000          | 0.112           | 123703      | 54463       | 38184       |
| P. ve. macrocalyx | P. ve. columnae      | P. grandis           | 0.013             | 2.435          | 0.007          | 0.002           | 357116      | 30684       | 29878       |
| P. ve. macrocalyx | P. ve. columnae      | P. juliae            | 0.015             | 2.402          | 0.008          | 0.003           | 195882      | 33655       | 32660       |
| P. ve. macrocalyx | P. ve. columnae      | P. megaseifolia      | 0.012             | 2.057          | 0.020          | 0.004           | 214183      | 31915       | 31142       |
| P. ve. macrocalyx | P. ve. columnae      | P. renifolia         | 0.007             | 1.120          | 0.131          | 0.002           | 202001      | 32774       | 32351       |
| P. ve. macrocalyx | P. ve. columnae      | P. vu. heterochroma  | 0.019             | 3.220          | 0.001          | 0.005           | 197326      | 34550       | 33243       |
| P. ve. macrocalyx | P. ve. columnae      | P. vu. sibthorpii GE | 0.019             | 3.121          | 0.001          | 0.005           | 193360      | 34937       | 33611       |
| P. ve. macrocalyx | P. ve. columnae      | P. vu. sibthorpii TR | 0.037             | 5.608          | 0.000          | 0.009           | 200564      | 36080       | 33521       |
| P. ve. macrocalyx | P. ve. columnae      | P. vu. vulgaris      | 0.021             | 3.658          | 0.000          | 0.005           | 204457      | 35322       | 33835       |
| P. ve. macrocalyx | P. vu. heterochroma  | P. grandis           | 0.227             | 24.455         | 0.000          | 0.092           | 214830      | 82139       | 51702       |
| P. ve. macrocalyx | P. vu. sibthorpii GE | P. grandis           | 0.230             | 25.126         | 0.000          | 0.092           | 217376      | 80626       | 50459       |
| P. ve. macrocalyx | P. vu. sibthorpii TR | P. grandis           | 0.185             | 18.955         | 0.000          | 0.076           | 217639      | 81480       | 56084       |
| P. ve. macrocalyx | P. vu. vulgaris      | P. grandis           | 0.134             | 12.408         | 0.000          | 0.057           | 219321      | 79886       | 60996       |
| P. ve. veris      | P. el. lofthousei    | P. el. cordifolia    | 0.024             | 2.712          | 0.003          | 0.014           | 45433       | 100715      | 95981       |
| P. ve. veris      | P. el. lofthousei    | P. el. elatior       | 0.178             | 23.512         | 0.000          | 0.138           | 49851       | 122551      | 85444       |
| P. ve. veris      | P. el. lofthousei    | P. el. leucophylla   | 0.029             | 3.287          | 0.001          | 0.016           | 46311       | 101295      | 95661       |
| P. ve. veris      | P. el. lofthousei    | P. el. meyeri        | 0.058             | 5.722          | 0.000          | 0.054           | 48511       | 101737      | 90641       |
| P. ve. veris      | P. el. lofthousei    | P. el. meyeri        | 0.087             | 10.174         | 0.000          | 0.076           | 49322       | 104431      | 87660       |
| P. ve. veris      | P. el. lofthousei    | P. grandis           | 0.252             | 29.422         | 0.000          | 0.129           | 181513      | 107758      | 64382       |



| <b>P1</b>    | <b>P2</b>            | <b>P3</b>            | <b>Dstatistic</b> | <b>Z-score</b> | <b>p-value</b> | <b>f4-ratio</b> | <b>BBAA</b> | <b>ABBA</b> | <b>BABA</b> |
|--------------|----------------------|----------------------|-------------------|----------------|----------------|-----------------|-------------|-------------|-------------|
| P. ve. veris | P. el. lofthousei    | P. juliae            | 0.106             | 12.405         | 0.000          | 0.065           | 47753       | 107441      | 86803       |
| P. ve. veris | P. el. lofthousei    | P. renifolia         | 0.100             | 10.208         | 0.000          | 0.077           | 50788       | 104780      | 85803       |
| P. ve. veris | P. el. lofthousei    | P. vu. heterochroma  | 0.093             | 12.651         | 0.000          | 0.073           | 49048       | 108745      | 90290       |
| P. ve. veris | P. el. lofthousei    | P. vu. sibthorpii GE | 0.054             | 6.745          | 0.000          | 0.041           | 48617       | 104387      | 93705       |
| P. ve. veris | P. el. lofthousei    | P. vu. sibthorpii TR | 0.064             | 8.384          | 0.000          | 0.045           | 53639       | 106190      | 93347       |
| P. ve. veris | P. el. lofthousei    | P. vu. vulgaris      | 0.038             | 4.536          | 0.000          | 0.024           | 57140       | 104854      | 97201       |
| P. ve. veris | P. el. pallasii      | P. el. cordifolia    | 0.044             | 5.103          | 0.000          | 0.025           | 44756       | 104363      | 95650       |
| P. ve. veris | P. el. pallasii      | P. el. elatior       | 0.175             | 22.289         | 0.000          | 0.132           | 50435       | 122448      | 85949       |
| P. ve. veris | P. el. pallasii      | P. el. leucophylla   | 0.048             | 5.768          | 0.000          | 0.027           | 45634       | 104960      | 95302       |
| P. ve. veris | P. el. pallasii      | P. el. meyeri        | 0.085             | 8.825          | 0.000          | 0.079           | 47740       | 106581      | 89907       |
| P. ve. veris | P. el. pallasii      | P. el. meyeri        | 0.107             | 12.810         | 0.000          | 0.093           | 49069       | 108284      | 87319       |
| P. ve. veris | P. el. pallasii      | P. juliae            | 0.124             | 15.308         | 0.000          | 0.074           | 47495       | 110917      | 86519       |
| P. ve. veris | P. el. pallasii      | P. renifolia         | 0.122             | 12.728         | 0.000          | 0.093           | 50454       | 108921      | 85318       |
| P. ve. veris | P. el. pallasii      | P. vu. heterochroma  | 0.113             | 16.042         | 0.000          | 0.089           | 48777       | 112969      | 89963       |
| P. ve. veris | P. el. pallasii      | P. vu. sibthorpii GE | 0.075             | 9.824          | 0.000          | 0.057           | 48342       | 108624      | 93436       |
| P. ve. veris | P. el. pallasii      | P. vu. sibthorpii TR | 0.083             | 11.451         | 0.000          | 0.057           | 53550       | 109883      | 93110       |
| P. ve. veris | P. el. pallasii      | P. vu. vulgaris      | 0.046             | 5.588          | 0.000          | 0.029           | 57670       | 106923      | 97475       |
| P. ve. veris | P. el. pseudoelatior | P. grandis           | 0.386             | 51.135         | 0.000          | 0.117           | 267969      | 73990       | 32802       |
| P. ve. veris | P. megaseifolia      | P. el. cordifolia    | 0.151             | 16.354         | 0.000          | 0.078           | 46879       | 103193      | 76119       |
| P. ve. veris | P. megaseifolia      | P. el. leucophylla   | 0.158             | 17.740         | 0.000          | 0.078           | 47685       | 103719      | 75379       |
| P. ve. veris | P. megaseifolia      | P. vu. sibthorpii GE | 0.177             | 22.672         | 0.000          | 0.120           | 50850       | 106080      | 74138       |
| P. ve. veris | P. ve. columnae      | P. el. cordifolia    | 0.288             | 38.074         | 0.000          | 0.069           | 158283      | 54027       | 29851       |
| P. ve. veris | P. ve. columnae      | P. el. elatior       | 0.259             | 33.700         | 0.000          | 0.076           | 176592      | 51578       | 30385       |
| P. ve. veris | P. ve. columnae      | P. el. leucophylla   | 0.289             | 37.463         | 0.000          | 0.066           | 159213      | 54030       | 29819       |
| P. ve. veris | P. ve. columnae      | P. el. lofthousei    | 0.258             | 29.498         | 0.000          | 0.046           | 205939      | 47539       | 28037       |
| P. ve. veris | P. ve. columnae      | P. el. meyeri        | 0.282             | 39.087         | 0.000          | 0.106           | 167381      | 51913       | 29091       |
| P. ve. veris | P. ve. columnae      | P. el. meyeri        | 0.260             | 34.826         | 0.000          | 0.091           | 170358      | 50271       | 29533       |
| P. ve. veris | P. ve. columnae      | P. el. pallasii      | 0.282             | 35.001         | 0.000          | 0.053           | 207641      | 49520       | 27749       |
| P. ve. veris | P. ve. columnae      | P. grandis           | 0.298             | 39.969         | 0.000          | 0.063           | 328107      | 48216       | 26053       |
| P. ve. veris | P. ve. columnae      | P. juliae            | 0.282             | 37.413         | 0.000          | 0.068           | 168127      | 51520       | 28884       |
| P. ve. veris | P. ve. columnae      | P. megaseifolia      | 0.288             | 41.343         | 0.000          | 0.093           | 185615      | 49676       | 27448       |
| P. ve. veris | P. ve. columnae      | P. renifolia         | 0.284             | 37.940         | 0.000          | 0.088           | 173797      | 51132       | 28491       |
| P. ve. veris | P. ve. columnae      | P. vu. heterochroma  | 0.283             | 37.403         | 0.000          | 0.089           | 169002      | 52938       | 29603       |
| P. ve. veris | P. ve. columnae      | P. vu. sibthorpii GE | 0.278             | 36.753         | 0.000          | 0.086           | 165139      | 53247       | 30096       |
| P. ve. veris | P. ve. columnae      | P. vu. sibthorpii TR | 0.288             | 38.777         | 0.000          | 0.083           | 172136      | 54758       | 30239       |
| P. ve. veris | P. ve. columnae      | P. vu. vulgaris      | 0.232             | 28.180         | 0.000          | 0.060           | 174799      | 52865       | 32942       |
| P. ve. veris | P. ve. macrocalyx    | P. el. cordifolia    | 0.305             | 38.349         | 0.000          | 0.073           | 159307      | 54962       | 29259       |
| P. ve. veris | P. ve. macrocalyx    | P. el. elatior       | 0.257             | 30.553         | 0.000          | 0.074           | 178073      | 51193       | 30256       |
| P. ve. veris | P. ve. macrocalyx    | P. el. leucophylla   | 0.302             | 37.936         | 0.000          | 0.069           | 160349      | 54687       | 29308       |
| P. ve. veris | P. ve. macrocalyx    | P. el. lofthousei    | 0.255             | 27.538         | 0.000          | 0.045           | 207462      | 46935       | 27849       |
| P. ve. veris | P. ve. macrocalyx    | P. el. meyeri        | 0.283             | 36.355         | 0.000          | 0.106           | 168710      | 51617       | 28855       |
| P. ve. veris | P. ve. macrocalyx    | P. el. meyeri        | 0.256             | 32.570         | 0.000          | 0.088           | 171890      | 49721       | 29463       |
| P. ve. veris | P. ve. macrocalyx    | P. el. pallasii      | 0.277             | 32.309         | 0.000          | 0.052           | 209300      | 48887       | 27680       |

| <b>P1</b>           | <b>P2</b>            | <b>P3</b>            | <b>Dstatistic</b> | <b>Z-score</b> | <b>p-value</b> | <b>f4-ratio</b> | <b>BBA</b> | <b>ABBA</b> | <b>BABA</b> |
|---------------------|----------------------|----------------------|-------------------|----------------|----------------|-----------------|------------|-------------|-------------|
| P. ve. veris        | P. ve. macrocalyx    | P. grandis           | 0.292             | 35.880         | 0.000          | 0.061           | 330100     | 47546       | 26055       |
| P. ve. veris        | P. ve. macrocalyx    | P. juliae            | 0.274             | 34.474         | 0.000          | 0.066           | 169728     | 50684       | 28886       |
| P. ve. veris        | P. ve. macrocalyx    | P. megaseifolia      | 0.283             | 35.723         | 0.000          | 0.090           | 187260     | 49043       | 27431       |
| P. ve. veris        | P. ve. macrocalyx    | P. renifolia         | 0.283             | 35.731         | 0.000          | 0.086           | 175224     | 50698       | 28344       |
| P. ve. veris        | P. ve. macrocalyx    | P. vu. heterochroma  | 0.272             | 34.004         | 0.000          | 0.084           | 170697     | 51853       | 29688       |
| P. ve. veris        | P. ve. macrocalyx    | P. vu. sibthorpii GE | 0.267             | 34.172         | 0.000          | 0.081           | 166740     | 52113       | 30148       |
| P. ve. veris        | P. ve. macrocalyx    | P. vu. sibthorpii TR | 0.266             | 33.039         | 0.000          | 0.074           | 174053     | 52621       | 30514       |
| P. ve. veris        | P. ve. macrocalyx    | P. vu. vulgaris      | 0.220             | 25.006         | 0.000          | 0.056           | 176479     | 51535       | 32964       |
| P. ve. veris        | P. vu. heterochroma  | P. grandis           | 0.347             | 39.748         | 0.000          | 0.147           | 211269     | 100368      | 48632       |
| P. ve. veris        | P. vu. sibthorpii GE | P. grandis           | 0.351             | 40.008         | 0.000          | 0.147           | 213854     | 98679       | 47351       |
| P. ve. veris        | P. vu. sibthorpii TR | P. grandis           | 0.307             | 32.349         | 0.000          | 0.132           | 214262     | 99820       | 52895       |
| P. ve. veris        | P. vu. vulgaris      | P. grandis           | 0.262             | 24.777         | 0.000          | 0.114           | 218635     | 97411       | 56932       |
| P. vu. heterochroma | P. el. cordifolia    | P. el. elatior       | 0.041             | 7.938          | 0.000          | 0.021           | 89686      | 60880       | 56052       |
| P. vu. heterochroma | P. el. cordifolia    | P. el. meyeri        | 0.076             | 15.070         | 0.000          | 0.053           | 83113      | 62419       | 53650       |
| P. vu. heterochroma | P. el. cordifolia    | P. el. meyeri        | 0.055             | 10.992         | 0.000          | 0.034           | 87910      | 59470       | 53257       |
| P. vu. heterochroma | P. el. cordifolia    | P. el. pseudoelatior | 0.091             | 16.747         | 0.000          | 0.055           | 83602      | 65395       | 54529       |
| P. vu. heterochroma | P. el. cordifolia    | P. grandis           | 0.044             | 10.596         | 0.000          | 0.015           | 233703     | 53540       | 49030       |
| P. vu. heterochroma | P. el. cordifolia    | P. megaseifolia      | 0.020             | 3.642          | 0.000          | 0.012           | 93576      | 56691       | 54449       |
| P. vu. heterochroma | P. el. cordifolia    | P. renifolia         | 0.062             | 12.947         | 0.000          | 0.034           | 87570      | 60342       | 53315       |
| P. vu. heterochroma | P. el. cordifolia    | P. ve. columnae      | 0.099             | 16.323         | 0.000          | 0.046           | 102995     | 62646       | 51379       |
| P. vu. heterochroma | P. el. cordifolia    | P. ve. macrocalyx    | 0.120             | 19.010         | 0.000          | 0.069           | 103713     | 64426       | 50590       |
| P. vu. heterochroma | P. el. cordifolia    | P. ve. veris         | 0.094             | 15.630         | 0.000          | 0.046           | 123430     | 58632       | 48561       |
| P. vu. heterochroma | P. el. elatior       | P. el. pallasii      | 0.048             | 7.290          | 0.000          | 0.020           | 86552      | 74989       | 68140       |
| P. vu. heterochroma | P. el. elatior       | P. grandis           | 0.157             | 31.850         | 0.000          | 0.065           | 205116     | 72082       | 52509       |
| P. vu. heterochroma | P. el. leucophylla   | P. el. elatior       | 0.037             | 7.360          | 0.000          | 0.019           | 89780      | 60837       | 56449       |
| P. vu. heterochroma | P. el. leucophylla   | P. el. meyeri        | 0.074             | 14.548         | 0.000          | 0.052           | 83114      | 62579       | 53946       |
| P. vu. heterochroma | P. el. leucophylla   | P. el. meyeri        | 0.053             | 10.444         | 0.000          | 0.033           | 87945      | 59586       | 53568       |
| P. vu. heterochroma | P. el. leucophylla   | P. el. pseudoelatior | 0.087             | 16.153         | 0.000          | 0.054           | 83832      | 65404       | 54923       |
| P. vu. heterochroma | P. el. leucophylla   | P. grandis           | 0.037             | 8.924          | 0.000          | 0.013           | 232372     | 53263       | 49458       |
| P. vu. heterochroma | P. el. leucophylla   | P. megaseifolia      | 0.018             | 3.297          | 0.000          | 0.011           | 93570      | 56823       | 54802       |
| P. vu. heterochroma | P. el. leucophylla   | P. renifolia         | 0.058             | 11.818         | 0.000          | 0.032           | 87639      | 60301       | 53723       |
| P. vu. heterochroma | P. el. leucophylla   | P. ve. columnae      | 0.087             | 14.829         | 0.000          | 0.041           | 103429     | 61990       | 52057       |
| P. vu. heterochroma | P. el. leucophylla   | P. ve. macrocalyx    | 0.106             | 17.853         | 0.000          | 0.061           | 104238     | 63509       | 51367       |
| P. vu. heterochroma | P. el. leucophylla   | P. ve. veris         | 0.081             | 14.171         | 0.000          | 0.040           | 123911     | 57990       | 49294       |
| P. vu. heterochroma | P. el. meyeri        | P. grandis           | 0.213             | 47.652         | 0.000          | 0.086           | 202931     | 72424       | 47030       |
| P. vu. heterochroma | P. el. meyeri        | P. grandis           | 0.207             | 42.847         | 0.000          | 0.086           | 198195     | 73839       | 48510       |
| P. vu. heterochroma | P. el. meyeri        | P. ve. columnae      | 0.004             | 0.570          | 0.284          | 0.002           | 85652      | 63663       | 63146       |
| P. vu. heterochroma | P. el. meyeri        | P. ve. macrocalyx    | 0.013             | 1.834          | 0.033          | 0.008           | 86645      | 64274       | 62659       |
| P. vu. heterochroma | P. el. meyeri        | P. ve. veris         | 0.008             | 1.138          | 0.127          | 0.005           | 105682     | 60764       | 59748       |
| P. vu. heterochroma | P. juliae            | P. el. lofthousei    | 0.016             | 2.660          | 0.004          | 0.005           | 101838     | 57703       | 55920       |
| P. vu. heterochroma | P. juliae            | P. el. meyeri        | 0.007             | 1.448          | 0.074          | 0.005           | 80188      | 59983       | 59109       |
| P. vu. heterochroma | P. juliae            | P. el. meyeri        | 0.006             | 1.080          | 0.140          | 0.004           | 84191      | 58502       | 57839       |
| P. vu. heterochroma | P. juliae            | P. el. pallasii      | 0.010             | 1.743          | 0.041          | 0.003           | 101124     | 59264       | 58097       |

| <b>P1</b>            | <b>P2</b>            | <b>P3</b>            | <b>Dstatistic</b> | <b>Z-score</b> | <b>p-value</b> | <b>f4-ratio</b> | <b>BBA</b> | <b>ABBA</b> | <b>BABA</b> |
|----------------------|----------------------|----------------------|-------------------|----------------|----------------|-----------------|------------|-------------|-------------|
| P. vu. heterochroma  | P. juliae            | P. grandis           | 0.026             | 6.339          | 0.000          | 0.010           | 227212     | 54348       | 51575       |
| P. vu. heterochroma  | P. juliae            | P. renifolia         | 0.010             | 1.906          | 0.028          | 0.006           | 84083      | 59238       | 58046       |
| P. vu. heterochroma  | P. megaseifolia      | P. grandis           | 0.175             | 33.944         | 0.000          | 0.073           | 196676     | 72480       | 50915       |
| P. vu. heterochroma  | P. renifolia         | P. grandis           | 0.226             | 49.291         | 0.000          | 0.094           | 198352     | 75396       | 47551       |
| P. vu. heterochroma  | P. ve. veris         | P. el. pseudoelator  | 0.139             | 13.585         | 0.000          | 0.136           | 37705      | 110502      | 83494       |
| P. vu. heterochroma  | P. vu. sibthorpii GE | P. el. cordifolia    | 0.020             | 3.381          | 0.000          | 0.007           | 145747     | 46216       | 44374       |
| P. vu. heterochroma  | P. vu. sibthorpii GE | P. el. elatior       | 0.016             | 3.683          | 0.000          | 0.006           | 177474     | 42379       | 41019       |
| P. vu. heterochroma  | P. vu. sibthorpii GE | P. el. leucophylla   | 0.021             | 3.433          | 0.000          | 0.006           | 144874     | 46409       | 44514       |
| P. vu. heterochroma  | P. vu. sibthorpii GE | P. el. meyeri        | 0.028             | 5.705          | 0.000          | 0.014           | 171364     | 42129       | 39824       |
| P. vu. heterochroma  | P. vu. sibthorpii GE | P. el. meyeri        | 0.015             | 3.167          | 0.001          | 0.007           | 175362     | 40719       | 39504       |
| P. vu. heterochroma  | P. vu. sibthorpii GE | P. el. pseudoelator  | 0.060             | 10.573         | 0.000          | 0.026           | 171027     | 44751       | 39707       |
| P. vu. heterochroma  | P. vu. sibthorpii GE | P. juliae            | 0.020             | 3.568          | 0.000          | 0.007           | 151541     | 44672       | 42914       |
| P. vu. heterochroma  | P. vu. sibthorpii GE | P. megaseifolia      | 0.009             | 2.038          | 0.021          | 0.004           | 180424     | 40393       | 39668       |
| P. vu. heterochroma  | P. vu. sibthorpii GE | P. renifolia         | 0.017             | 3.496          | 0.000          | 0.007           | 175912     | 41171       | 39756       |
| P. vu. heterochroma  | P. vu. sibthorpii GE | P. ve. columnae      | 0.049             | 9.081          | 0.000          | 0.016           | 192500     | 42017       | 38082       |
| P. vu. heterochroma  | P. vu. sibthorpii GE | P. ve. macrocalyx    | 0.049             | 9.193          | 0.000          | 0.019           | 194275     | 41932       | 38033       |
| P. vu. heterochroma  | P. vu. sibthorpii GE | P. ve. veris         | 0.053             | 9.852          | 0.000          | 0.018           | 214128     | 39846       | 35859       |
| P. vu. heterochroma  | P. vu. sibthorpii GE | P. vu. sibthorpii TR | 0.085             | 11.133         | 0.000          | 0.066           | 96747      | 64833       | 54660       |
| P. vu. heterochroma  | P. vu. sibthorpii GE | P. vu. vulgaris      | 0.067             | 8.521          | 0.000          | 0.038           | 109230     | 60882       | 53184       |
| P. vu. heterochroma  | P. vu. sibthorpii TR | P. el. cordifolia    | 0.023             | 4.164          | 0.000          | 0.009           | 114149     | 56478       | 53958       |
| P. vu. heterochroma  | P. vu. sibthorpii TR | P. el. elatior       | 0.002             | 0.459          | 0.323          | 0.001           | 145569     | 50733       | 50500       |
| P. vu. heterochroma  | P. vu. sibthorpii TR | P. el. leucophylla   | 0.018             | 3.361          | 0.000          | 0.007           | 113877     | 56285       | 54264       |
| P. vu. sibthorpii GE | P. el. cordifolia    | P. el. elatior       | 0.030             | 5.749          | 0.000          | 0.015           | 89752      | 59213       | 55738       |
| P. vu. sibthorpii GE | P. el. cordifolia    | P. el. meyeri        | 0.056             | 10.200         | 0.000          | 0.039           | 82827      | 60363       | 53916       |
| P. vu. sibthorpii GE | P. el. cordifolia    | P. el. meyeri        | 0.045             | 8.349          | 0.000          | 0.027           | 88147      | 57902       | 52938       |
| P. vu. sibthorpii GE | P. el. cordifolia    | P. el. pseudoelator  | 0.049             | 8.054          | 0.000          | 0.030           | 82294      | 62394       | 56607       |
| P. vu. sibthorpii GE | P. el. cordifolia    | P. grandis           | 0.044             | 10.384         | 0.000          | 0.015           | 234623     | 52812       | 48360       |
| P. vu. sibthorpii GE | P. el. cordifolia    | P. megaseifolia      | 0.013             | 2.394          | 0.008          | 0.008           | 93962      | 55361       | 53887       |
| P. vu. sibthorpii GE | P. el. cordifolia    | P. renifolia         | 0.050             | 9.615          | 0.000          | 0.027           | 87639      | 58617       | 53050       |
| P. vu. sibthorpii GE | P. el. cordifolia    | P. ve. columnae      | 0.064             | 10.694         | 0.000          | 0.030           | 101918     | 60042       | 52770       |
| P. vu. sibthorpii GE | P. el. cordifolia    | P. ve. macrocalyx    | 0.087             | 14.044         | 0.000          | 0.050           | 102552     | 61773       | 51879       |
| P. vu. sibthorpii GE | P. el. cordifolia    | P. ve. veris         | 0.057             | 9.588          | 0.000          | 0.028           | 122173     | 56049       | 49972       |
| P. vu. sibthorpii GE | P. el. elatior       | P. el. pallasii      | 0.073             | 11.069         | 0.000          | 0.030           | 88502      | 75590       | 65320       |
| P. vu. sibthorpii GE | P. el. elatior       | P. grandis           | 0.158             | 31.373         | 0.000          | 0.065           | 205888     | 71559       | 52022       |
| P. vu. sibthorpii GE | P. el. leucophylla   | P. el. elatior       | 0.026             | 5.016          | 0.000          | 0.013           | 89862      | 59125       | 56119       |
| P. vu. sibthorpii GE | P. el. leucophylla   | P. el. meyeri        | 0.055             | 9.773          | 0.000          | 0.039           | 82812      | 60449       | 54166       |
| P. vu. sibthorpii GE | P. el. leucophylla   | P. el. meyeri        | 0.042             | 7.885          | 0.000          | 0.026           | 88156      | 57962       | 53246       |
| P. vu. sibthorpii GE | P. el. leucophylla   | P. el. pseudoelator  | 0.045             | 7.519          | 0.000          | 0.029           | 82548      | 62375       | 56967       |
| P. vu. sibthorpii GE | P. el. leucophylla   | P. grandis           | 0.037             | 8.664          | 0.000          | 0.013           | 233298     | 52495       | 48777       |
| P. vu. sibthorpii GE | P. el. leucophylla   | P. megaseifolia      | 0.011             | 1.974          | 0.024          | 0.007           | 93974      | 55452       | 54222       |
| P. vu. sibthorpii GE | P. el. leucophylla   | P. renifolia         | 0.045             | 8.738          | 0.000          | 0.025           | 87719      | 58543       | 53448       |
| P. vu. sibthorpii GE | P. el. leucophylla   | P. ve. columnae      | 0.052             | 8.815          | 0.000          | 0.025           | 102373     | 59346       | 53439       |
| P. vu. sibthorpii GE | P. el. leucophylla   | P. ve. macrocalyx    | 0.072             | 12.368         | 0.000          | 0.042           | 103105     | 60829       | 52646       |

| <b>P1</b>            | <b>P2</b>            | <b>P3</b>           | <b>Dstatistic</b> | <b>Z-score</b> | <b>p-value</b> | <b>f4-ratio</b> | <b>BBAA</b> | <b>ABBA</b> | <b>BABA</b> |
|----------------------|----------------------|---------------------|-------------------|----------------|----------------|-----------------|-------------|-------------|-------------|
| P. vu. sibthorpii GE | P. el. leucophylla   | P. ve. veris        | 0.044             | 7.756          | 0.000          | 0.022           | 122693      | 55392       | 50694       |
| P. vu. sibthorpii GE | P. el. meyeri        | P. grandis          | 0.215             | 47.515         | 0.000          | 0.086           | 204307      | 71575       | 46245       |
| P. vu. sibthorpii GE | P. el. meyeri        | P. grandis          | 0.208             | 42.809         | 0.000          | 0.086           | 198744      | 73248       | 48000       |
| P. vu. sibthorpii GE | P. juliae            | P. el. cordifolia   | 0.054             | 6.506          | 0.000          | 0.027           | 57235       | 72864       | 65336       |
| P. vu. sibthorpii GE | P. juliae            | P. el. leucophylla  | 0.060             | 7.090          | 0.000          | 0.029           | 57168       | 73526       | 65176       |
| P. vu. sibthorpii GE | P. juliae            | P. el. lofthousei   | 0.046             | 8.405          | 0.000          | 0.014           | 103953      | 58155       | 53086       |
| P. vu. sibthorpii GE | P. juliae            | P. el. pallasii     | 0.039             | 7.162          | 0.000          | 0.013           | 103337      | 59780       | 55335       |
| P. vu. sibthorpii GE | P. juliae            | P. grandis          | 0.026             | 6.568          | 0.000          | 0.009           | 228206      | 53772       | 51031       |
| P. vu. sibthorpii GE | P. megaseifolia      | P. el. lofthousei   | 0.007             | 1.267          | 0.103          | 0.003           | 83796       | 64759       | 63812       |
| P. vu. sibthorpii GE | P. megaseifolia      | P. el. meyeri       | 0.070             | 10.822         | 0.000          | 0.060           | 53278       | 74438       | 64649       |
| P. vu. sibthorpii GE | P. megaseifolia      | P. el. pallasii     | 0.008             | 1.389          | 0.082          | 0.003           | 82734       | 67222       | 66161       |
| P. vu. sibthorpii GE | P. megaseifolia      | P. grandis          | 0.175             | 33.361         | 0.000          | 0.073           | 197000      | 72168       | 50663       |
| P. vu. sibthorpii GE | P. renifolia         | P. grandis          | 0.228             | 48.947         | 0.000          | 0.094           | 199028      | 74731       | 46966       |
| P. vu. sibthorpii GE | P. ve. veris         | P. el. pseudoelator | 0.115             | 10.436         | 0.000          | 0.114           | 38163       | 106769      | 84743       |
| P. vu. sibthorpii GE | P. vu. heterochroma  | P. el. lofthousei   | 0.042             | 9.122          | 0.000          | 0.009           | 194218      | 41206       | 37858       |
| P. vu. sibthorpii GE | P. vu. heterochroma  | P. el. pallasii     | 0.041             | 8.822          | 0.000          | 0.010           | 195977      | 42907       | 39541       |
| P. vu. sibthorpii GE | P. vu. heterochroma  | P. grandis          | 0.000             | 0.010          | 0.496          | 0.000           | 324553      | 37179       | 37176       |
| P. vu. sibthorpii GE | P. vu. sibthorpii TR | P. el. cordifolia   | 0.006             | 1.108          | 0.134          | 0.002           | 120346      | 52750       | 52069       |
| P. vu. sibthorpii GE | P. vu. sibthorpii TR | P. el. leucophylla  | 0.001             | 0.226          | 0.411          | 0.000           | 119984      | 52534       | 52396       |
| P. vu. sibthorpii TR | P. el. cordifolia    | P. el. elatior      | 0.039             | 6.781          | 0.000          | 0.020           | 93748       | 62231       | 57616       |
| P. vu. sibthorpii TR | P. el. cordifolia    | P. el. lofthousei   | 0.039             | 6.649          | 0.000          | 0.012           | 117268      | 56725       | 52478       |
| P. vu. sibthorpii TR | P. el. cordifolia    | P. el. meyeri       | 0.097             | 17.921         | 0.000          | 0.067           | 87757       | 64414       | 52978       |
| P. vu. sibthorpii TR | P. el. cordifolia    | P. el. meyeri       | 0.087             | 15.331         | 0.000          | 0.053           | 92936       | 61779       | 51866       |
| P. vu. sibthorpii TR | P. el. cordifolia    | P. el. pallasii     | 0.043             | 7.584          | 0.000          | 0.014           | 116510      | 58786       | 53885       |
| P. vu. sibthorpii TR | P. el. cordifolia    | P. el. pseudoelator | 0.099             | 16.783         | 0.000          | 0.060           | 87600       | 66617       | 54666       |
| P. vu. sibthorpii TR | P. el. cordifolia    | P. grandis          | 0.095             | 19.563         | 0.000          | 0.033           | 240385      | 57036       | 47148       |
| P. vu. sibthorpii TR | P. el. cordifolia    | P. megaseifolia     | 0.058             | 8.930          | 0.000          | 0.035           | 99000       | 59424       | 52872       |
| P. vu. sibthorpii TR | P. el. cordifolia    | P. renifolia        | 0.089             | 16.144         | 0.000          | 0.048           | 92364       | 62371       | 52135       |
| P. vu. sibthorpii TR | P. el. cordifolia    | P. ve. columnae     | 0.104             | 16.114         | 0.000          | 0.049           | 107368      | 63991       | 51896       |
| P. vu. sibthorpii TR | P. el. cordifolia    | P. ve. macrocalyx   | 0.137             | 21.038         | 0.000          | 0.078           | 108316      | 66004       | 50065       |
| P. vu. sibthorpii TR | P. el. cordifolia    | P. ve. veris        | 0.109             | 17.324         | 0.000          | 0.053           | 128294      | 60207       | 48388       |
| P. vu. sibthorpii TR | P. el. elatior       | P. grandis          | 0.197             | 36.905         | 0.000          | 0.082           | 210155      | 76455       | 51332       |
| P. vu. sibthorpii TR | P. el. leucophylla   | P. el. elatior      | 0.034             | 6.145          | 0.000          | 0.018           | 93405       | 62252       | 58116       |
| P. vu. sibthorpii TR | P. el. leucophylla   | P. el. lofthousei   | 0.035             | 5.826          | 0.000          | 0.010           | 117227      | 56940       | 53139       |
| P. vu. sibthorpii TR | P. el. leucophylla   | P. el. meyeri       | 0.095             | 17.481         | 0.000          | 0.067           | 87300       | 64613       | 53375       |
| P. vu. sibthorpii TR | P. el. leucophylla   | P. el. meyeri       | 0.084             | 14.604         | 0.000          | 0.052           | 92536       | 61968       | 52356       |
| P. vu. sibthorpii TR | P. el. leucophylla   | P. el. pallasii     | 0.039             | 6.778          | 0.000          | 0.013           | 116396      | 59002       | 54545       |
| P. vu. sibthorpii TR | P. el. leucophylla   | P. el. pseudoelator | 0.094             | 16.259         | 0.000          | 0.059           | 87415       | 66695       | 55192       |
| P. vu. sibthorpii TR | P. el. leucophylla   | P. grandis          | 0.087             | 17.862         | 0.000          | 0.031           | 238598      | 56811       | 47720       |
| P. vu. sibthorpii TR | P. el. leucophylla   | P. megaseifolia     | 0.055             | 8.411          | 0.000          | 0.034           | 98553       | 59623       | 53372       |
| P. vu. sibthorpii TR | P. el. leucophylla   | P. renifolia        | 0.084             | 15.186         | 0.000          | 0.047           | 92021       | 62425       | 52704       |
| P. vu. sibthorpii TR | P. el. leucophylla   | P. ve. columnae     | 0.092             | 14.444         | 0.000          | 0.043           | 107348      | 63382       | 52704       |
| P. vu. sibthorpii TR | P. el. leucophylla   | P. ve. macrocalyx   | 0.122             | 20.057         | 0.000          | 0.070           | 108385      | 65127       | 50964       |

| <b>P1</b>            | <b>P2</b>            | <b>P3</b>            | <b>Dstatistic</b> | <b>Z-score</b> | <b>p-value</b> | <b>f4-ratio</b> | <b>BBAA</b> | <b>ABBA</b> | <b>BABA</b> |
|----------------------|----------------------|----------------------|-------------------|----------------|----------------|-----------------|-------------|-------------|-------------|
| P. vu. sibthorpii TR | P. el. leucophylla   | P. ve. veris         | 0.095             | 15.765         | 0.000          | 0.047           | 128347      | 59630       | 49272       |
| P. vu. sibthorpii TR | P. el. meyeri        | P. el. lofthousei    | 0.011             | 1.953          | 0.025          | 0.004           | 93147       | 63726       | 62316       |
| P. vu. sibthorpii TR | P. el. meyeri        | P. el. lofthousei    | 0.031             | 5.513          | 0.000          | 0.011           | 87636       | 67576       | 63478       |
| P. vu. sibthorpii TR | P. el. meyeri        | P. el. pallasii      | 0.025             | 4.484          | 0.000          | 0.009           | 91913       | 66991       | 63706       |
| P. vu. sibthorpii TR | P. el. meyeri        | P. el. pallasii      | 0.034             | 6.007          | 0.000          | 0.013           | 86792       | 69923       | 65377       |
| P. vu. sibthorpii TR | P. el. meyeri        | P. grandis           | 0.251             | 52.217         | 0.000          | 0.102           | 205435      | 77245       | 46288       |
| P. vu. sibthorpii TR | P. el. meyeri        | P. grandis           | 0.242             | 47.199         | 0.000          | 0.102           | 199918      | 78945       | 48162       |
| P. vu. sibthorpii TR | P. el. meyeri        | P. ve. columnae      | 0.011             | 1.608          | 0.054          | 0.006           | 86132       | 66538       | 65115       |
| P. vu. sibthorpii TR | P. el. meyeri        | P. ve. macrocalyx    | 0.029             | 4.524          | 0.000          | 0.018           | 87338       | 67366       | 63585       |
| P. vu. sibthorpii TR | P. el. meyeri        | P. ve. veris         | 0.023             | 3.382          | 0.000          | 0.013           | 106535      | 63766       | 60910       |
| P. vu. sibthorpii TR | P. el. pallasii      | P. grandis           | 0.011             | 2.224          | 0.013          | 0.005           | 199551      | 70597       | 69089       |
| P. vu. sibthorpii TR | P. juliae            | P. el. cordifolia    | 0.048             | 5.506          | 0.000          | 0.025           | 56964       | 75785       | 68791       |
| P. vu. sibthorpii TR | P. juliae            | P. el. leucophylla   | 0.058             | 6.464          | 0.000          | 0.029           | 57057       | 76548       | 68204       |
| P. vu. sibthorpii TR | P. juliae            | P. el. lofthousei    | 0.081             | 13.554         | 0.000          | 0.026           | 105844      | 62663       | 53246       |
| P. vu. sibthorpii TR | P. juliae            | P. el. meyeri        | 0.029             | 5.068          | 0.000          | 0.021           | 82044       | 63013       | 59488       |
| P. vu. sibthorpii TR | P. juliae            | P. el. meyeri        | 0.036             | 6.291          | 0.000          | 0.023           | 86514       | 61818       | 57544       |
| P. vu. sibthorpii TR | P. juliae            | P. el. pallasii      | 0.079             | 13.613         | 0.000          | 0.028           | 105317      | 64535       | 55033       |
| P. vu. sibthorpii TR | P. juliae            | P. grandis           | 0.074             | 15.677         | 0.000          | 0.027           | 230905      | 58706       | 50649       |
| P. vu. sibthorpii TR | P. juliae            | P. megaseifolia      | 0.026             | 4.330          | 0.000          | 0.017           | 91587       | 60749       | 57661       |
| P. vu. sibthorpii TR | P. juliae            | P. renifolia         | 0.036             | 6.154          | 0.000          | 0.021           | 86003       | 62256       | 57915       |
| P. vu. sibthorpii TR | P. juliae            | P. ve. macrocalyx    | 0.006             | 1.007          | 0.157          | 0.003           | 103996      | 59179       | 58492       |
| P. vu. sibthorpii TR | P. juliae            | P. ve. veris         | 0.001             | 0.194          | 0.423          | 0.001           | 122831      | 56173       | 56041       |
| P. vu. sibthorpii TR | P. megaseifolia      | P. el. elatior       | 0.064             | 10.237         | 0.000          | 0.041           | 59316       | 79210       | 69742       |
| P. vu. sibthorpii TR | P. megaseifolia      | P. el. lofthousei    | 0.039             | 6.421          | 0.000          | 0.014           | 84235       | 69991       | 64769       |
| P. vu. sibthorpii TR | P. megaseifolia      | P. el. pallasii      | 0.044             | 7.557          | 0.000          | 0.018           | 83174       | 72692       | 66560       |
| P. vu. sibthorpii TR | P. megaseifolia      | P. grandis           | 0.210             | 39.029         | 0.000          | 0.089           | 198071      | 77812       | 50782       |
| P. vu. sibthorpii TR | P. renifolia         | P. el. lofthousei    | 0.018             | 3.164          | 0.001          | 0.006           | 89067       | 66011       | 63689       |
| P. vu. sibthorpii TR | P. renifolia         | P. el. pallasii      | 0.023             | 4.140          | 0.000          | 0.009           | 88095       | 68605       | 65515       |
| P. vu. sibthorpii TR | P. renifolia         | P. grandis           | 0.262             | 53.926         | 0.000          | 0.110           | 200379      | 80324       | 46932       |
| P. vu. sibthorpii TR | P. ve. veris         | P. el. pseudoelatior | 0.141             | 13.036         | 0.000          | 0.139           | 38191       | 113182      | 85141       |
| P. vu. sibthorpii TR | P. vu. heterochroma  | P. el. lofthousei    | 0.082             | 16.278         | 0.000          | 0.021           | 164363      | 51130       | 43399       |
| P. vu. sibthorpii TR | P. vu. heterochroma  | P. el. meyeri        | 0.027             | 5.192          | 0.000          | 0.016           | 140721      | 50335       | 47649       |
| P. vu. sibthorpii TR | P. vu. heterochroma  | P. el. meyeri        | 0.038             | 7.491          | 0.000          | 0.019           | 144962      | 49824       | 46136       |
| P. vu. sibthorpii TR | P. vu. heterochroma  | P. el. pallasii      | 0.087             | 18.202         | 0.000          | 0.024           | 165407      | 53264       | 44753       |
| P. vu. sibthorpii TR | P. vu. heterochroma  | P. el. pseudoelatior | 0.011             | 2.031          | 0.021          | 0.006           | 141037      | 50727       | 49595       |
| P. vu. sibthorpii TR | P. vu. heterochroma  | P. grandis           | 0.061             | 14.343         | 0.000          | 0.018           | 293890      | 47039       | 41616       |
| P. vu. sibthorpii TR | P. vu. heterochroma  | P. juliae            | 0.012             | 1.849          | 0.032          | 0.005           | 121254      | 53502       | 52246       |
| P. vu. sibthorpii TR | P. vu. heterochroma  | P. megaseifolia      | 0.045             | 8.499          | 0.000          | 0.023           | 149903      | 50079       | 45759       |
| P. vu. sibthorpii TR | P. vu. heterochroma  | P. renifolia         | 0.033             | 6.221          | 0.000          | 0.015           | 145041      | 49904       | 46691       |
| P. vu. sibthorpii TR | P. vu. heterochroma  | P. ve. columnae      | 0.009             | 1.396          | 0.081          | 0.003           | 162026      | 48348       | 47505       |
| P. vu. sibthorpii TR | P. vu. heterochroma  | P. ve. macrocalyx    | 0.022             | 3.876          | 0.000          | 0.010           | 163972      | 48548       | 46438       |
| P. vu. sibthorpii TR | P. vu. heterochroma  | P. ve. veris         | 0.020             | 3.329          | 0.000          | 0.008           | 183774      | 46042       | 44268       |
| P. vu. sibthorpii TR | P. vu. sibthorpii GE | P. el. elatior       | 0.012             | 2.285          | 0.011          | 0.005           | 152300      | 48693       | 47583       |

| <b>P1</b>            | <b>P2</b>            | <b>P3</b>           | <b>Dstatistic</b> | <b>Z-score</b> | <b>p-value</b> | <b>f4-ratio</b> | <b>BBA</b> | <b>ABBA</b> | <b>BABA</b> |
|----------------------|----------------------|---------------------|-------------------|----------------|----------------|-----------------|------------|-------------|-------------|
| P. vu. sibthorpii TR | P. vu. sibthorpii GE | P. el. lofthousei   | 0.048             | 9.280          | 0.000          | 0.012           | 172858     | 46522       | 42262       |
| P. vu. sibthorpii TR | P. vu. sibthorpii GE | P. el. meyeri       | 0.053             | 10.019         | 0.000          | 0.029           | 147114     | 49184       | 44224       |
| P. vu. sibthorpii TR | P. vu. sibthorpii GE | P. el. meyeri       | 0.053             | 11.010         | 0.000          | 0.026           | 151741     | 48023       | 43152       |
| P. vu. sibthorpii TR | P. vu. sibthorpii GE | P. el. pallasii     | 0.055             | 11.847         | 0.000          | 0.014           | 173948     | 48540       | 43492       |
| P. vu. sibthorpii TR | P. vu. sibthorpii GE | P. el. pseudoelator | 0.064             | 12.088         | 0.000          | 0.031           | 146237     | 51242       | 45087       |
| P. vu. sibthorpii TR | P. vu. sibthorpii GE | P. grandis          | 0.063             | 15.446         | 0.000          | 0.018           | 301511     | 45003       | 39643       |
| P. vu. sibthorpii TR | P. vu. sibthorpii GE | P. juliae           | 0.030             | 4.787          | 0.000          | 0.011           | 127651     | 51741       | 48743       |
| P. vu. sibthorpii TR | P. vu. sibthorpii GE | P. megaseifolia     | 0.055             | 10.266         | 0.000          | 0.027           | 156962     | 48002       | 43023       |
| P. vu. sibthorpii TR | P. vu. sibthorpii GE | P. renifolia        | 0.050             | 9.778          | 0.000          | 0.022           | 151755     | 48218       | 43618       |
| P. vu. sibthorpii TR | P. vu. sibthorpii GE | P. ve. columnae     | 0.052             | 8.683          | 0.000          | 0.019           | 167527     | 48245       | 43443       |
| P. vu. sibthorpii TR | P. vu. sibthorpii GE | P. ve. macrocalyx   | 0.066             | 12.365         | 0.000          | 0.029           | 169525     | 48444       | 42418       |
| P. vu. sibthorpii TR | P. vu. sibthorpii GE | P. ve. veris        | 0.067             | 11.796         | 0.000          | 0.026           | 189238     | 46052       | 40261       |
| P. vu. sibthorpii TR | P. vu. vulgaris      | P. ve. veris        | 0.003             | 0.415          | 0.339          | 0.001           | 269366     | 34822       | 34640       |
| P. vu. vulgaris      | P. el. cordifolia    | P. el. elatior      | 0.037             | 5.503          | 0.000          | 0.021           | 91079      | 67015       | 62188       |
| P. vu. vulgaris      | P. el. cordifolia    | P. el. lofthousei   | 0.079             | 11.600         | 0.000          | 0.025           | 115838     | 62385       | 53245       |
| P. vu. vulgaris      | P. el. cordifolia    | P. el. meyeri       | 0.128             | 20.348         | 0.000          | 0.079           | 91204      | 67347       | 52082       |
| P. vu. vulgaris      | P. el. cordifolia    | P. el. pallasii     | 0.102             | 16.700         | 0.000          | 0.034           | 115484     | 65073       | 53065       |
| P. vu. vulgaris      | P. el. cordifolia    | P. grandis          | 0.149             | 27.885         | 0.000          | 0.053           | 238987     | 62929       | 46572       |
| P. vu. vulgaris      | P. el. cordifolia    | P. megaseifolia     | 0.119             | 18.542         | 0.000          | 0.072           | 97885      | 65690       | 51740       |
| P. vu. vulgaris      | P. el. cordifolia    | P. renifolia        | 0.131             | 22.362         | 0.000          | 0.073           | 90693      | 68081       | 52283       |
| P. vu. vulgaris      | P. el. cordifolia    | P. ve. columnae     | 0.135             | 19.491         | 0.000          | 0.065           | 105268     | 69208       | 52721       |
| P. vu. vulgaris      | P. el. cordifolia    | P. ve. macrocalyx   | 0.157             | 22.398         | 0.000          | 0.093           | 105921     | 70971       | 51665       |
| P. vu. vulgaris      | P. el. cordifolia    | P. ve. veris        | 0.100             | 13.495         | 0.000          | 0.052           | 124872     | 64087       | 52436       |
| P. vu. vulgaris      | P. el. elatior       | P. grandis          | 0.242             | 45.167         | 0.000          | 0.101           | 215003     | 81448       | 49685       |
| P. vu. vulgaris      | P. el. leucophylla   | P. el. elatior      | 0.033             | 5.024          | 0.000          | 0.019           | 89954      | 67217       | 62863       |
| P. vu. vulgaris      | P. el. leucophylla   | P. el. lofthousei   | 0.074             | 10.807         | 0.000          | 0.023           | 115012     | 62753       | 54111       |
| P. vu. vulgaris      | P. el. leucophylla   | P. el. meyeri       | 0.124             | 19.684         | 0.000          | 0.078           | 90026      | 67711       | 52797       |
| P. vu. vulgaris      | P. el. leucophylla   | P. el. pallasii     | 0.096             | 15.895         | 0.000          | 0.032           | 114563     | 65436       | 53933       |
| P. vu. vulgaris      | P. el. leucophylla   | P. grandis          | 0.141             | 26.414         | 0.000          | 0.051           | 236365     | 62820       | 47337       |
| P. vu. vulgaris      | P. el. leucophylla   | P. megaseifolia     | 0.114             | 17.863         | 0.000          | 0.071           | 96629      | 66037       | 52481       |
| P. vu. vulgaris      | P. el. leucophylla   | P. renifolia        | 0.125             | 21.363         | 0.000          | 0.071           | 89568      | 68298       | 53087       |
| P. vu. vulgaris      | P. el. leucophylla   | P. ve. columnae     | 0.122             | 17.816         | 0.000          | 0.060           | 104460     | 68773       | 53773       |
| P. vu. vulgaris      | P. el. leucophylla   | P. ve. macrocalyx   | 0.142             | 21.332         | 0.000          | 0.085           | 105201     | 70269       | 52793       |
| P. vu. vulgaris      | P. el. leucophylla   | P. ve. veris        | 0.087             | 12.018         | 0.000          | 0.046           | 124124     | 63676       | 53528       |
| P. vu. vulgaris      | P. el. lofthousei    | P. grandis          | 0.036             | 6.590          | 0.000          | 0.017           | 194504     | 73991       | 68915       |
| P. vu. vulgaris      | P. el. meyeri        | P. el. lofthousei   | 0.049             | 7.588          | 0.000          | 0.017           | 93554      | 68760       | 62378       |
| P. vu. vulgaris      | P. el. meyeri        | P. el. lofthousei   | 0.066             | 10.616         | 0.000          | 0.024           | 87572      | 72697       | 63673       |
| P. vu. vulgaris      | P. el. meyeri        | P. el. pallasii     | 0.078             | 13.430         | 0.000          | 0.029           | 92747      | 72651       | 62177       |
| P. vu. vulgaris      | P. el. meyeri        | P. grandis          | 0.293             | 58.302         | 0.000          | 0.121           | 206270     | 82834       | 45309       |
| P. vu. vulgaris      | P. el. meyeri        | P. grandis          | 0.283             | 54.250         | 0.000          | 0.121           | 200240     | 84594       | 47288       |
| P. vu. vulgaris      | P. el. meyeri        | P. ve. columnae     | 0.043             | 5.842          | 0.000          | 0.023           | 86005      | 71192       | 65365       |
| P. vu. vulgaris      | P. el. meyeri        | P. ve. columnae     | 0.003             | 0.364          | 0.358          | 0.001           | 82882      | 70336       | 69985       |
| P. vu. vulgaris      | P. el. meyeri        | P. ve. macrocalyx   | 0.052             | 7.496          | 0.000          | 0.034           | 86939      | 71781       | 64631       |

| <b>P1</b>       | <b>P2</b>            | <b>P3</b>           | <b>Dstatistic</b> | <b>Z-score</b> | <b>p-value</b> | <b>f4-ratio</b> | <b>BBAA</b> | <b>ABBA</b> | <b>BABA</b> |
|-----------------|----------------------|---------------------|-------------------|----------------|----------------|-----------------|-------------|-------------|-------------|
| P. vu. vulgaris | P. el. meyeri        | P. ve. macrocalyx   | 0.009             | 1.348          | 0.089          | 0.006           | 84002       | 70717       | 69471       |
| P. vu. vulgaris | P. el. meyeri        | P. ve. veris        | 0.020             | 2.680          | 0.004          | 0.012           | 105207      | 67188       | 64552       |
| P. vu. vulgaris | P. el. pallasii      | P. grandis          | 0.055             | 10.885         | 0.000          | 0.026           | 198643      | 76725       | 68721       |
| P. vu. vulgaris | P. el. pseudoelator  | P. grandis          | 0.012             | 1.356          | 0.088          | 0.005           | 222845      | 63322       | 61815       |
| P. vu. vulgaris | P. juliae            | P. el. cordifolia   | 0.094             | 10.284         | 0.000          | 0.050           | 55435       | 82853       | 68558       |
| P. vu. vulgaris | P. juliae            | P. el. lofthousei   | 0.116             | 18.359         | 0.000          | 0.039           | 103639      | 68742       | 54445       |
| P. vu. vulgaris | P. juliae            | P. el. meyeri       | 0.064             | 10.745         | 0.000          | 0.048           | 79329       | 68921       | 60616       |
| P. vu. vulgaris | P. juliae            | P. el. meyeri       | 0.076             | 12.422         | 0.000          | 0.050           | 83908       | 67770       | 58181       |
| P. vu. vulgaris | P. juliae            | P. el. pallasii     | 0.132             | 22.394         | 0.000          | 0.047           | 103496      | 71299       | 54694       |
| P. vu. vulgaris | P. juliae            | P. el. pseudoelator | 0.041             | 6.419          | 0.000          | 0.026           | 80905       | 67935       | 62592       |
| P. vu. vulgaris | P. juliae            | P. grandis          | 0.126             | 24.601         | 0.000          | 0.047           | 228641      | 64940       | 50456       |
| P. vu. vulgaris | P. juliae            | P. megaseifolia     | 0.083             | 13.382         | 0.000          | 0.054           | 89677       | 67464       | 57078       |
| P. vu. vulgaris | P. juliae            | P. renifolia        | 0.078             | 12.611         | 0.000          | 0.046           | 83522       | 68382       | 58526       |
| P. vu. vulgaris | P. juliae            | P. ve. columnae     | 0.028             | 4.196          | 0.000          | 0.014           | 99391       | 64359       | 60907       |
| P. vu. vulgaris | P. juliae            | P. ve. macrocalyx   | 0.032             | 4.965          | 0.000          | 0.019           | 100725      | 64505       | 60530       |
| P. vu. vulgaris | P. megaseifolia      | P. el. elatior      | 0.061             | 8.572          | 0.000          | 0.042           | 56962       | 84399       | 74692       |
| P. vu. vulgaris | P. megaseifolia      | P. grandis          | 0.250             | 45.440         | 0.000          | 0.109           | 197018      | 84111       | 50514       |
| P. vu. vulgaris | P. renifolia         | P. el. lofthousei   | 0.054             | 8.536          | 0.000          | 0.020           | 88969       | 71259       | 63982       |
| P. vu. vulgaris | P. renifolia         | P. el. pallasii     | 0.074             | 13.166         | 0.000          | 0.029           | 88442       | 74527       | 64246       |
| P. vu. vulgaris | P. renifolia         | P. grandis          | 0.302             | 60.493         | 0.000          | 0.129           | 200651      | 86122       | 46150       |
| P. vu. vulgaris | P. ve. veris         | P. el. pseudoelator | 0.172             | 16.247         | 0.000          | 0.165           | 41794       | 116669      | 82349       |
| P. vu. vulgaris | P. vu. heterochroma  | P. el. cordifolia   | 0.041             | 6.806          | 0.000          | 0.017           | 108175      | 61741       | 56827       |
| P. vu. vulgaris | P. vu. heterochroma  | P. el. elatior      | 0.000             | 0.002          | 0.499          | 0.000           | 137617      | 56500       | 56498       |
| P. vu. vulgaris | P. vu. heterochroma  | P. el. leucophylla  | 0.054             | 8.701          | 0.000          | 0.021           | 108308      | 62295       | 55923       |
| P. vu. vulgaris | P. vu. heterochroma  | P. el. lofthousei   | 0.123             | 19.787         | 0.000          | 0.034           | 157719      | 57866       | 45182       |
| P. vu. vulgaris | P. vu. heterochroma  | P. el. meyeri       | 0.071             | 11.883         | 0.000          | 0.043           | 133606      | 57074       | 49485       |
| P. vu. vulgaris | P. vu. heterochroma  | P. el. meyeri       | 0.088             | 14.763         | 0.000          | 0.047           | 137995      | 56613       | 47447       |
| P. vu. vulgaris | P. vu. heterochroma  | P. el. pallasii     | 0.148             | 26.843         | 0.000          | 0.044           | 159163      | 60769       | 45060       |
| P. vu. vulgaris | P. vu. heterochroma  | P. el. pseudoelator | 0.068             | 11.342         | 0.000          | 0.036           | 134505      | 57988       | 50596       |
| P. vu. vulgaris | P. vu. heterochroma  | P. grandis          | 0.125             | 25.183         | 0.000          | 0.038           | 287011      | 53916       | 41955       |
| P. vu. vulgaris | P. vu. heterochroma  | P. juliae           | 0.087             | 13.554         | 0.000          | 0.036           | 115833      | 61659       | 51768       |
| P. vu. vulgaris | P. vu. heterochroma  | P. megaseifolia     | 0.114             | 20.134         | 0.000          | 0.060           | 143573      | 57570       | 45782       |
| P. vu. vulgaris | P. vu. heterochroma  | P. renifolia        | 0.085             | 14.356         | 0.000          | 0.041           | 138094      | 56817       | 47933       |
| P. vu. vulgaris | P. vu. heterochroma  | P. ve. columnae     | 0.051             | 7.436          | 0.000          | 0.021           | 154636      | 54753       | 49482       |
| P. vu. vulgaris | P. vu. heterochroma  | P. ve. macrocalyx   | 0.053             | 8.088          | 0.000          | 0.026           | 156253      | 54681       | 49174       |
| P. vu. vulgaris | P. vu. heterochroma  | P. ve. veris        | 0.016             | 2.125          | 0.017          | 0.007           | 174957      | 51031       | 49455       |
| P. vu. vulgaris | P. vu. sibthorpii GE | P. el. cordifolia   | 0.059             | 9.295          | 0.000          | 0.023           | 112379      | 60293       | 53551       |
| P. vu. vulgaris | P. vu. sibthorpii GE | P. el. elatior      | 0.012             | 1.955          | 0.025          | 0.006           | 142248      | 55041       | 53685       |
| P. vu. vulgaris | P. vu. sibthorpii GE | P. el. leucophylla  | 0.073             | 11.083         | 0.000          | 0.027           | 112465      | 60854       | 52622       |
| P. vu. vulgaris | P. vu. sibthorpii GE | P. el. lofthousei   | 0.094             | 15.135         | 0.000          | 0.025           | 164095      | 53474       | 44295       |
| P. vu. vulgaris | P. vu. sibthorpii GE | P. el. meyeri       | 0.096             | 16.038         | 0.000          | 0.056           | 137902      | 56256       | 46413       |
| P. vu. vulgaris | P. vu. sibthorpii GE | P. el. meyeri       | 0.103             | 18.707         | 0.000          | 0.053           | 142656      | 55104       | 44780       |
| P. vu. vulgaris | P. vu. sibthorpii GE | P. el. pallasii     | 0.121             | 22.718         | 0.000          | 0.034           | 165558      | 56337       | 44146       |

| <b>P1</b>       | <b>P2</b>            | <b>P3</b>            | <b>Dstatistic</b> | <b>Z-score</b> | <b>p-value</b> | <b>f4-ratio</b> | <b>BBAA</b> | <b>ABBA</b> | <b>BABA</b> |
|-----------------|----------------------|----------------------|-------------------|----------------|----------------|-----------------|-------------|-------------|-------------|
| P. vu. vulgaris | P. vu. sibthorpii GE | P. el. pseudoelator  | 0.118             | 20.990         | 0.000          | 0.060           | 137691      | 58911       | 46503       |
| P. vu. vulgaris | P. vu. sibthorpii GE | P. grandis           | 0.129             | 26.645         | 0.000          | 0.038           | 292563      | 52157       | 40263       |
| P. vu. vulgaris | P. vu. sibthorpii GE | P. juliae            | 0.107             | 16.814         | 0.000          | 0.043           | 120126      | 60246       | 48639       |
| P. vu. vulgaris | P. vu. sibthorpii GE | P. megaseifolia      | 0.125             | 22.219         | 0.000          | 0.064           | 148553      | 55838       | 43396       |
| P. vu. vulgaris | P. vu. sibthorpii GE | P. renifolia         | 0.102             | 18.553         | 0.000          | 0.047           | 142718      | 55449       | 45197       |
| P. vu. vulgaris | P. vu. sibthorpii GE | P. ve. columnae      | 0.091             | 14.570         | 0.000          | 0.036           | 158116      | 55055       | 45827       |
| P. vu. vulgaris | P. vu. sibthorpii GE | P. ve. macrocalyx    | 0.094             | 15.594         | 0.000          | 0.045           | 159763      | 54975       | 45559       |
| P. vu. vulgaris | P. vu. sibthorpii GE | P. ve. veris         | 0.058             | 8.321          | 0.000          | 0.025           | 178356      | 51413       | 45818       |
| P. vu. vulgaris | P. vu. sibthorpii TR | P. el. cordifolia    | 0.094             | 18.207         | 0.000          | 0.026           | 194036      | 43607       | 36140       |
| P. vu. vulgaris | P. vu. sibthorpii TR | P. el. elatior       | 0.003             | 0.480          | 0.316          | 0.001           | 228811      | 39542       | 39294       |
| P. vu. vulgaris | P. vu. sibthorpii TR | P. el. leucophylla   | 0.106             | 20.341         | 0.000          | 0.027           | 193326      | 44000       | 35573       |
| P. vu. vulgaris | P. vu. sibthorpii TR | P. el. lofthousei    | 0.071             | 12.575         | 0.000          | 0.013           | 249468      | 37854       | 32865       |
| P. vu. vulgaris | P. vu. sibthorpii TR | P. el. meyeri        | 0.067             | 12.565         | 0.000          | 0.028           | 225823      | 39031       | 34100       |
| P. vu. vulgaris | P. vu. sibthorpii TR | P. el. meyeri        | 0.077             | 14.502         | 0.000          | 0.028           | 230366      | 38542       | 33030       |
| P. vu. vulgaris | P. vu. sibthorpii TR | P. el. pallasii      | 0.100             | 20.038         | 0.000          | 0.020           | 253857      | 39893       | 32661       |
| P. vu. vulgaris | P. vu. sibthorpii TR | P. el. pseudoelator  | 0.085             | 16.493         | 0.000          | 0.030           | 225581      | 40412       | 34098       |
| P. vu. vulgaris | P. vu. sibthorpii TR | P. grandis           | 0.099             | 22.317         | 0.000          | 0.021           | 383226      | 36591       | 29997       |
| P. vu. vulgaris | P. vu. sibthorpii TR | P. juliae            | 0.113             | 21.228         | 0.000          | 0.032           | 204100      | 42737       | 34058       |
| P. vu. vulgaris | P. vu. sibthorpii TR | P. megaseifolia      | 0.105             | 21.263         | 0.000          | 0.038           | 236925      | 39437       | 31916       |
| P. vu. vulgaris | P. vu. sibthorpii TR | P. renifolia         | 0.079             | 15.132         | 0.000          | 0.026           | 230869      | 38933       | 33232       |
| P. vu. vulgaris | P. vu. sibthorpii TR | P. ve. columnae      | 0.062             | 11.560         | 0.000          | 0.017           | 247380      | 38418       | 33954       |
| P. vu. vulgaris | P. vu. sibthorpii TR | P. ve. macrocalyx    | 0.048             | 9.567          | 0.000          | 0.016           | 249854      | 37515       | 34089       |
| P. vu. vulgaris | P. vu. sibthorpii TR | P. vu. heterochroma  | 0.145             | 25.734         | 0.000          | 0.100           | 148455      | 55404       | 41385       |
| P. vu. vulgaris | P. vu. sibthorpii TR | P. vu. sibthorpii GE | 0.164             | 22.911         | 0.000          | 0.115           | 141150      | 58614       | 42125       |



SUPPLEMENTARY TABLE S5. Posterior probabilities for every state in ancestral state estimation in *Primula* sect. *Primula*. Node number corresponds to Figure S6. A=Alps, B=British Isles, C=Caucasus, I=Iberian Peninsula, R=Carpathians, S=Siberia/northern Asia.

| N<br>o<br>d<br>e | A     | A+B<br>+C | A+B+<br>C+I | A+B<br>+<br>C+I+<br>R | A+B<br>+<br>C+I<br>+S | A+B+<br>C+R | A+B<br>+<br>C+S | A+B+I | A+B+<br>I+R | A+B<br>+<br>I+<br>R+S | A+B<br>+S | A+C   | A+C<br>+I | A+C<br>+<br>I+R | A+C+<br>I+R<br>+S | A+C<br>+<br>I+S | A+C<br>+R | A+C+<br>R+S | A+C<br>+S | A+I   | A+R   | A+R<br>+S | A+S   | B     | B+C<br>+I | B+C   |
|------------------|-------|-----------|-------------|-----------------------|-----------------------|-------------|-----------------|-------|-------------|-----------------------|-----------|-------|-----------|-----------------|-------------------|-----------------|-----------|-------------|-----------|-------|-------|-----------|-------|-------|-----------|-------|
| 1                | 0     | 0.01      | 0.004       | 0                     | 0                     | 0.003       | 0.003           | 0.001 | 0.001       | 0                     | 0         | 0.067 | 0.015     | 0.004           | 0.001             | 0               | 0.015     | 0.001       | 0.014     | 0.001 | 0     | 0         | 0     | 0.001 | 0.023     | 0.069 |
| 2                | 0     | 0.001     | 0           | 0                     | 0                     | 0           | 0               | 0     | 0           | 0                     | 0         | 0.029 | 0.001     | 0               | 0                 | 0               | 0.003     | 0           | 0         | 0     | 0     | 0         | 0     | 0     | 0         | 0.015 |
| 3                | 0     | 0.001     | 0           | 0                     | 0                     | 0           | 0               | 0     | 0           | 0                     | 0         | 0.015 | 0         | 0               | 0                 | 0               | 0.001     | 0           | 0         | 0     | 0     | 0         | 0     | 0     | 0         | 0.011 |
| 4                | 0     | 0.001     | 0           | 0                     | 0                     | 0           | 0               | 0     | 0           | 0                     | 0         | 0.02  | 0         | 0               | 0                 | 0               | 0         | 0           | 0.001     | 0     | 0     | 0         | 0     | 0     | 0         | 0.015 |
| 5                | 0     | 0.001     | 0           | 0                     | 0                     | 0           | 0               | 0     | 0           | 0                     | 0         | 0.033 | 0         | 0               | 0                 | 0               | 0.001     | 0           | 0         | 0     | 0     | 0         | 0     | 0     | 0.001     | 0.025 |
| 6                | 0     | 0         | 0           | 0                     | 0                     | 0           | 0               | 0     | 0           | 0                     | 0         | 0.009 | 0         | 0               | 0                 | 0               | 0         | 0           | 0         | 0     | 0     | 0         | 0     | 0     | 0         | 0.013 |
| 7                | 0     | 0         | 0           | 0                     | 0                     | 0           | 0               | 0     | 0           | 0                     | 0         | 0.014 | 0         | 0               | 0                 | 0               | 0.001     | 0           | 0         | 0     | 0     | 0         | 0     | 0     | 0         | 0.004 |
| 8                | 0     | 0         | 0           | 0                     | 0                     | 0           | 0               | 0     | 0           | 0                     | 0         | 0.008 | 0         | 0               | 0                 | 0               | 0         | 0           | 0         | 0     | 0     | 0         | 0     | 0     | 0         | 0.002 |
| 9                | 0     | 0.003     | 0           | 0                     | 0                     | 0           | 0               | 0     | 0           | 0                     | 0         | 0.019 | 0         | 0               | 0                 | 0.001           | 0         | 0.001       | 0.003     | 0     | 0     | 0         | 0     | 0     | 0         | 0.014 |
| 10               | 0     | 0.007     | 0           | 0                     | 0.001                 | 0.001       | 0.003           | 0     | 0           | 0                     | 0         | 0.049 | 0.004     | 0.001           | 0.001             | 0.004           | 0.007     | 0.002       | 0.02      | 0     | 0     | 0.001     | 0.002 | 0     | 0.005     | 0.043 |
| 11               | 0     | 0.001     | 0           | 0                     | 0                     | 0           | 0.001           | 0     | 0           | 0                     | 0         | 0.034 | 0.002     | 0.001           | 0                 | 0.004           | 0.001     | 0.001       | 0.021     | 0     | 0     | 0         | 0.002 | 0.001 | 0.002     | 0.025 |
| 12               | 0     | 0         | 0           | 0                     | 0                     | 0           | 0               | 0     | 0           | 0                     | 0         | 0.004 | 0         | 0               | 0                 | 0               | 0         | 0           | 0         | 0     | 0     | 0         | 0     | 0     | 0         | 0.002 |
| 13               | 0     | 0         | 0           | 0                     | 0                     | 0           | 0               | 0     | 0           | 0                     | 0         | 0.022 | 0         | 0               | 0                 | 0               | 0.003     | 0           | 0.001     | 0     | 0     | 0         | 0     | 0     | 0.001     | 0.014 |
| 14               | 0     | 0         | 0           | 0                     | 0                     | 0           | 0               | 0     | 0           | 0                     | 0         | 0.013 | 0.002     | 0               | 0                 | 0               | 0.002     | 0           | 0         | 0     | 0     | 0         | 0     | 0     | 0.001     | 0.017 |
| 15               | 0.002 | 0.013     | 0           | 0.001                 | 0                     | 0.001       | 0               | 0     | 0           | 0                     | 0         | 0.077 | 0.017     | 0.002           | 0                 | 0               | 0.019     | 0.002       | 0.001     | 0.003 | 0     | 0         | 0     | 0.005 | 0.011     | 0.079 |
| 16               | 0     | 0         | 0           | 0                     | 0                     | 0           | 0               | 0     | 0           | 0                     | 0         | 0.004 | 0         | 0               | 0                 | 0               | 0.001     | 0           | 0         | 0     | 0     | 0         | 0     | 0     | 0         | 0.009 |
| 17               | 0     | 0         | 0           | 0                     | 0                     | 0           | 0               | 0     | 0           | 0                     | 0         | 0.003 | 0         | 0               | 0                 | 0               | 0         | 0           | 0         | 0     | 0     | 0         | 0     | 0     | 0         | 0.005 |
| 18               | 0.006 | 0         | 0           | 0                     | 0                     | 0.001       | 0.001           | 0.002 | 0           | 0                     | 0.001     | 0.027 | 0.011     | 0               | 0                 | 0.003           | 0.002     | 0.001       | 0.004     | 0.011 | 0.002 | 0         | 0.002 | 0.007 | 0.01      | 0.028 |

SUPPLEMENTARY TABLE S5. *Continued.*

| N<br>O<br>D<br>E | B+C+<br>I+R | B+<br>C+<br>I+R<br>+S | B<br>+C+<br>I+S | B+C<br>+R | B+C<br>+<br>R+S | B+C<br>+S | B+I   | B+I<br>+R | B+I<br>+S | B+R   | B+S   | C     | C+I   | C+I+<br>R | C+I+<br>R+S | C+I+<br>S | C+R   | C+R<br>+S | C+S   | I     | I+R   | I+R+<br>S | I+S   | R     | R+S   | S     |
|------------------|-------------|-----------------------|-----------------|-----------|-----------------|-----------|-------|-----------|-----------|-------|-------|-------|-------|-----------|-------------|-----------|-------|-----------|-------|-------|-------|-----------|-------|-------|-------|-------|
| 20               | 0.002       | 0                     | 0               | 0.009     | 0.002           | 0.011     | 0     | 0         | 0         | 0     | 0     | 0.482 | 0.077 | 0.012     | 0           | 0.014     | 0.066 | 0.016     | 0.07  | 0     | 0.001 | 0         | 0.001 | 0     | 0.001 | 0.003 |
| 21               | 0           | 0                     | 0               | 0.002     | 0               | 0.001     | 0     | 0         | 0         | 0     | 0     | 0.877 | 0.028 | 0.002     | 0           | 0         | 0.023 | 0.002     | 0.016 | 0     | 0     | 0         | 0     | 0     | 0     | 0     |
| 22               | 0           | 0                     | 0               | 0.002     | 0               | 0.001     | 0     | 0         | 0         | 0     | 0     | 0.929 | 0.02  | 0.001     | 0           | 0         | 0.011 | 0.001     | 0.007 | 0     | 0     | 0         | 0     | 0     | 0     | 0     |
| 23               | 0           | 0                     | 0               | 0.002     | 0               | 0         | 0     | 0         | 0         | 0     | 0     | 0.926 | 0.017 | 0         | 0           | 0         | 0.013 | 0         | 0.005 | 0     | 0     | 0         | 0     | 0     | 0     | 0     |
| 24               | 0           | 0                     | 0               | 0.002     | 0               | 0         | 0     | 0         | 0         | 0     | 0     | 0.877 | 0.028 | 0.001     | 0           | 0         | 0.022 | 0         | 0.009 | 0     | 0     | 0         | 0     | 0     | 0     | 0     |
| 25               | 0           | 0                     | 0               | 0         | 0               | 0         | 0     | 0         | 0         | 0     | 0     | 0.94  | 0.017 | 0         | 0           | 0         | 0.011 | 0         | 0.01  | 0     | 0     | 0         | 0     | 0     | 0     | 0     |
| 26               | 0           | 0                     | 0               | 0         | 0               | 0.001     | 0     | 0         | 0         | 0     | 0     | 0.937 | 0.022 | 0.001     | 0           | 0         | 0.011 | 0         | 0.009 | 0     | 0     | 0         | 0     | 0     | 0     | 0     |
| 27               | 0           | 0                     | 0               | 0         | 0               | 0.001     | 0     | 0         | 0         | 0     | 0     | 0.965 | 0.01  | 0.001     | 0           | 0         | 0.006 | 0         | 0.007 | 0     | 0     | 0         | 0     | 0     | 0     | 0     |
| 28               | 0.001       | 0                     | 0               | 0.004     | 0               | 0.001     | 0     | 0         | 0         | 0     | 0     | 0.844 | 0.018 | 0.001     | 0           | 0.001     | 0.021 | 0.002     | 0.065 | 0     | 0     | 0         | 0     | 0     | 0     | 0.001 |
| 29               | 0           | 0                     | 0               | 0.001     | 0.004           | 0.022     | 0     | 0         | 0         | 0     | 0.001 | 0.483 | 0.049 | 0.003     | 0.005       | 0.02      | 0.045 | 0.022     | 0.185 | 0.001 | 0     | 0         | 0     | 0.002 | 0     | 0.006 |
| 30               | 0           | 0                     | 0               | 0.002     | 0.002           | 0.011     | 0.001 | 0         | 0         | 0     | 0.001 | 0.569 | 0.025 | 0.002     | 0.002       | 0.012     | 0.028 | 0.018     | 0.224 | 0     | 0     | 0         | 0     | 0     | 0     | 0.007 |
| 31               | 0           | 0                     | 0               | 0         | 0               | 0         | 0     | 0         | 0         | 0     | 0     | 0.975 | 0.007 | 0.001     | 0           | 0         | 0.004 | 0         | 0.007 | 0     | 0     | 0         | 0     | 0     | 0     | 0     |
| 32               | 0           | 0                     | 0               | 0         | 0               | 0         | 0     | 0         | 0         | 0     | 0     | 0.91  | 0.02  | 0.003     | 0           | 0         | 0.015 | 0         | 0.011 | 0     | 0     | 0         | 0     | 0     | 0     | 0     |
| 33               | 0           | 0                     | 0               | 0         | 0               | 0.001     | 0     | 0         | 0         | 0     | 0     | 0.922 | 0.012 | 0         | 0           | 0         | 0.016 | 0         | 0.014 | 0     | 0     | 0         | 0     | 0     | 0     | 0     |
| 34               | 0.004       | 0.001                 | 0.001           | 0.006     | 0               | 0.003     | 0.003 | 0         | 0         | 0.002 | 0     | 0.557 | 0.077 | 0.011     | 0.001       | 0.003     | 0.066 | 0.002     | 0.018 | 0.003 | 0.002 | 0         | 0     | 0.004 | 0     | 0.003 |
| 35               | 0           | 0                     | 0               | 0         | 0               | 0         | 0     | 0         | 0         | 0     | 0     | 0.96  | 0.008 | 0         | 0           | 0         | 0.007 | 0         | 0.011 | 0     | 0     | 0         | 0     | 0     | 0     | 0     |
| 36               | 0           | 0                     | 0               | 0         | 0               | 0         | 0     | 0         | 0         | 0     | 0     | 0.985 | 0.003 | 0         | 0           | 0         | 0.002 | 0         | 0.002 | 0     | 0     | 0         | 0     | 0     | 0     | 0     |
| 37               | 0.001       | 0                     | 0.001           | 0.004     | 0               | 0.006     | 0.005 | 0.002     | 0.001     | 0     | 0.001 | 0.385 | 0.17  | 0.017     | 0.002       | 0.023     | 0.025 | 0.002     | 0.053 | 0.095 | 0.005 | 0.001     | 0.026 | 0.007 | 0.002 | 0.047 |

## Methods S1 Study System and Geographic Sampling

*Primula* sect. *Primula* represents an ideal system to test the power of WGR to investigate sources of non-monophyly because of its distinctive biological characteristics and the wealth of available scientific resources. First, there have been extensive taxonomic studies of this clade for centuries (Linnaeus, 1753; Darwin, 1868; Smith *et al.*, 1984; Richards, 1989, 2003) culminating in the seminal monograph on *Primula* by Richards (2003). Second, the clade includes only seven species restricted to Eurasia, of which six are diploid and one is tetraploid, thus facilitating complete species and subspecies sampling and limiting analytical problems connected with extensive polyploidy. Third, a chromosome-scale reference genome is available for one species (*P. veris*; Potente *et al.* 2022) in the section, a necessity for high confidence and accuracy in calling single nucleotide polymorphisms (Fuentes-Pardo & Ruzzante, 2017). Fourth, hybridization has been amply studied in both natural populations and artificial crosses, indicating that gene flow among the three widespread species, possibly among all diploid species, is possible (Darwin, 1868; Smith & Fletcher, 1947; Valentine, 1947, 1961; Woodell, 1969; Kálmán *et al.*, 2004; Keller *et al.*, 2016, 2021; Tendal *et al.*, 2018). Finally, although *Primula* sect. *Primula* is distributed throughout Eurasia, the highest species diversity occurs in the Caucasus (Richards 2003), a remarkable biodiversity hotspot that is ranked as one of the most diverse and endangered ecoregions in the world (Mittermeier *et al.*, 2011).

Targeted fieldwork was conducted in 2018 to collect accessions covering the taxonomic and geographic diversity of *Primula* sect. *Primula* (Fig. 1A,B). All ingroup samples were collected in the field except for *P. renifolia*. Every currently recognized species and subspecies of *Primula* sect. *Primula* (following Richards 2003) was obtained from at least one population, while from every population we collected two individuals (Table S1). For most populations of the heterostylous taxa, we collected one S-morph and one L-morph plant. Multiple, geographically distinct populations of subspecies were sampled to capture morphological and molecular variation for *P. elatior*, *P. veris*, *P. vulgaris*, and *P. grandis* (Fig. 1; Table S1). Due to the limited distribution of *P. juliae* and *P. megaseifolia*, only one population was sampled for these species. Samples of *P. renifolia* were acquired from the Gothenberg Botanical Garden; these plants were originally obtained from their native range in the Caucasus region of Russia (collection number NCE230-1). Additionally, eight outgroup accessions used in previous phylogenetic analyses (Schmidt-Lebuhn *et al.*, 2012; de Vos *et al.*, 2014) were obtained from the

University of Zurich frozen tissue collection (Supplementary Table S1). This resulted in 98 ingroup and eight outgroup samples, totaling 106 specimens. All tissue was silica dried and herbarium accessions from every population were deposited at either Z, TBI, or ADO.

## **Methods S2** Species networks estimation with NANUQ

Species networks were estimated using the NANUQ algorithm as implemented in the R package MSCquartets (Allman *et al.*, 2019). NANUQ is based on an analysis of gene tree quartets, combining several statistical tests including quartet-based between-species distances appropriate to networks and splits graphs. Unlike pseudo-likelihood methods, NANUQ does not require the user to set an arbitrary limit on the number of hybridization events in the network. We tested multiple values of alpha and beta, as recommended by the authors, with the goal of testing for a signal of network cycles in the quartets (not shown). We selected an alpha of  $5e-11$  to impose a high standard for evidence of hybridization and a beta of 0.05, which requires stronger evidence for any resolution of the 4-taxon network. The NANUQ quartet hypothesis test showed that the selected alpha and beta were a good fit to our data because the quartet counts concordance factors (qcCFs) that are clustered close to the three-line segments in the simplex plot were recovered as being tree-like (Supporting Information Fig. A). In concordance, many of the qcCFs that were not close to three-line segments reject tree-like models and instead are in support of a network model (Supporting Information Fig. A), thus justifying a hybridization network (Allman *et al.*, 2019).

## Quartet Hypothesis Test

NANUQ,  $\alpha=5e-11$ ,  $\beta=0.05$

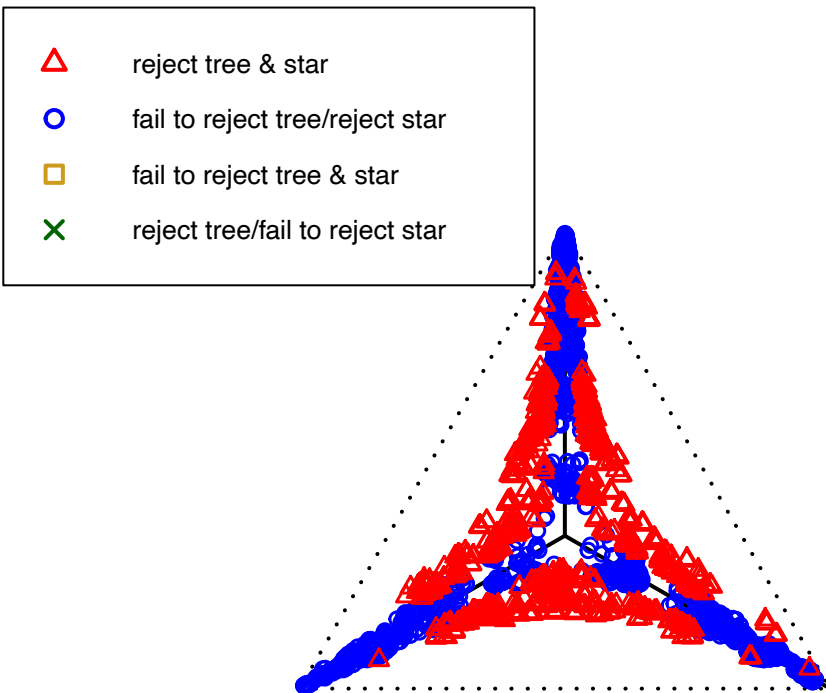

**Fig. A.** Simplex plot of NANUQ's quartet hypothesis test. The NANUQ quartet hypothesis test determines whether to view the quartet counts concordance factors (qcCF) as supporting (1) a star tree, (2) a resolved tree, or (3) a 4-cycle network. The results of the hypothesis tests suggest that the qcCFs close to the three-line segments are classified as tree-like (blue circles), and those farther away which were viewed as supporting a 4-cycle network (red triangles). Thus, the selected alpha ( $5e-11$ ) and beta (0.05) are a good fit to our data because the qcCFs that are clustered close to the three-line segments in the simplex plot, which represent the true tree, are recovered as being tree-like.

### Methods S3 Supplementary D-statistic analyses and information

We used  $D_{\text{FOIL}}$  (Pease & Hahn, 2015) to confirm admixture events identified using the Fb statistic.  $D_{\text{FOIL}}$  is similar to D-statistics except that it employs 5-taxon (quintet) trees consisting of  $((P1,P2),(P3,P4)),O$  rather than quartets.  $D_{\text{FOIL}}$  has been shown to accurately detect ancestral introgression events and exhibits exceptionally low false-positive rates (Pease & Hahn, 2015; Suvorov *et al.*, 2022). One caveat of  $D_{\text{FOIL}}$  is that it requires that the divergence time of (P3,P4) to diverge earlier in time than (P1,P2). Therefore, we selected the order of each quintet based on the chronogram in Supplementary Figure 6. Analogous to Dsuite, we applied  $D_{\text{FOIL}}$  to the entire genomic data set.

Introgression from a ghost lineage can significantly impact D-statistics, including the f4-ratio and Fbranch. Following the methods of Hibbins and Hahn (2021), we used the D-statistics generated from Dsuite for the entire genome (Supporting Information Table S4) to investigate the potential of ghost lineages having impacted our results. We focused on the two introgression events identified in Dsuite as having the highest Fb (Fig. 4). If one considers a quartet of  $[(P1,P2),P3],O$ , we can swap out the P1 for different, closely related species (hereafter referred to as P1-1 and P1-2). If P1-1 is the recipient of introgression from a ghost lineage this would result in P1-1 and P2 being sister taxa, and the incorrect inference of introgression between P2 and P3. In contrast, when running the same analysis with P1-2 (which has not received introgression from a ghost lineage) P1 and P2 will still be recovered as sister taxa, and we will not infer introgression between P2 and P3. Therefore, examined species quartets where P1 was either *P. megaseifolia*, *P. el. elatior*, *P. el. meyeri* GE, *P. el. meyeri* TR, or *P. renifolia* (corresponding to the introgression event identified in Fig. 4 letter A) and for *P. el. pseudoelatior*, *P. ve. macrocalyx*, or *P. ve. columnae* TR (corresponding to the introgression event identified in Fig. 4 letter B). We compared D-statistics, Z-scores, and p-values for these quartets. For any quartet with a significant D-statistic, we then examined if P2 and P3 had significant D-statistics if we swapped out another species (excluding those already identified as introgressed i.e., the other species in Fig. 4 A and B) for the target P1. In every case, multiple species (>4) exchanged for the target P1 resulted in significant D-statistics (Supporting Information Table S4). For further information, see Hibbins and Hahn (2021).

### Methods S4 Ancestral Range Estimation

Methods used to reconstruct ancestral character states and ranges integrate information from branch lengths during the inference. Branch lengths can be specified in either units of time (chronograms) or units of molecular divergence (phylograms) (Litsios & Salamin, 2012; Matzke, 2013). Given that no fossil calibration points are available within our sampled taxa, we employed two methods to recover the ancestral range of this clade without a fossil-dated phylogeny. By using two methods, one employing a phylogram and the other employing a chronogram with relative dating, we can compare and contrast the results of each analysis to address the biogeographical patterns of *Primula* sect. *Primula*. In addition to conducting an ARE using a phylogram, we investigated if ARE with a time-tree recovered similar ancestral ranges as those run with a phylogram. To do this, we created an ultrametric tree through relative dating by putting a tight normal prior on the root of *Primula* sect. *Primula*. Specifically, we used the least square dating (LSD2) method implemented in IQ-tree, which incorporate the possibility of rate variation from branch to branch (To *et al.*, 2016). Dating is performed in three steps: 1) the best-fitting model is selected using ModelFinder, 2) the ML tree with branch lengths in number of substitutions per site is constructed, and 3) the branch lengths of the ML tree are rescaled, with rates varying from branch to branch, to build a time tree with a dated ancestral node. We set the root age to 10 with a standard deviation of 0.01. The output includes estimates of the substitution rate, the root date, and the dates of all internal tree nodes. This tree was used in ARE analyses identical to those employed for the phylogram, and the best model was also identified by the AIC as the transient model. All nodes recovered the Caucasus as the range with the highest probability.

## References

**Darwin C. 1868.** On the Specific Difference between *Primula veris*, Brit. Fl. (var. *officinalis* of Linn.), *P. vulgaris*, Brit. Fl. (var. *acaulis*, Linn.), and *P. elatior*, Jacq.; and on the Hybrid Nature of the common Oxlip. With Supplementary Remarks on naturally-produced Hybrids in the genus *Verbascum*. *Botanical Journal of the Linnean Society* **10**.

**Fuentes-Pardo AP, Ruzzante DE. 2017.** Whole-genome sequencing approaches for conservation biology: Advantages, limitations and practical recommendations. *Molecular Ecology* **26**: 5369–5406.

**Hibbins MS, Hahn MW. 2021.** Phylogenomic approaches to detecting and characterizing introgression. *Genetics*: 17.

- Kálmán K, Medvegy A, Mihalik E. 2004.** Pattern of the floral variation in the hybrid zone of two distylous *Primula* species. *Flora - Morphology, Distribution, Functional Ecology of Plants* **199**: 218–227.
- Keller B, Ganz R, Mora-Carrera E, Nowak MD, Theodoridis S, Koutroumpa K, Conti E. 2021.** Asymmetries of reproductive isolation are reflected in directionalities of hybridization: integrative evidence on the complexity of species boundaries. *New Phytologist* **229**: 1795–1809.
- Keller B, de Vos JM, Schmidt-Lebuhn AN, Thomson JD, Conti E. 2016.** Both morph- and species-dependent asymmetries affect reproductive barriers between heterostylous species. *Ecology and Evolution* **6**: 6223–6244.
- Linnaeus C. 1753.** *Species plantarum : exhibentes plantas rite cognitatas ad genera relatas, cum differentiis specificis, nominibus trivialibus, synonymis selectis, locis natalibus, secundum systema sexuale digestas*. London.
- Litsios G, Salamin N. 2012.** Effects of Phylogenetic Signal on Ancestral State Reconstruction. *Systematic Biology* **61**: 533–538.
- Matzke NJ. 2013.** Probabilistic historical biogeography: new models for founder-event speciation, imperfect detection, and fossils allow improved accuracy and model-testing. *Frontiers of Biogeography* **5**: 242–248.
- Pease JB, Hahn MW. 2015.** Detection and Polarization of Introgression in a Five-Taxon Phylogeny. *Systematic Biology* **64**: 651–662.
- Richards AJ. 1989.** *Primulas of the British Isles*. Shire.
- Richards AJ. 2003.** *Primula*. Batsford, London.
- Schmidt-Lebuhn AN, de Vos JM, Keller B, Conti E. 2012.** Phylogenetic analysis of *Primula* section *Primula* reveals rampant non-monophyly among morphologically distinct species. *Molecular Phylogenetics and Evolution* **65**: 23–34.
- Smith GF, Burrow B, Lowe DB. 1984.** *Primulas of Europe and America*. Alpine Garden Society.
- Smith WW, Fletcher HR. 1947.** The Genus *Primula*: Section *Vernales* Pax. *Transactions of the Botanical Society of Edinburgh* **34**: 402–468.
- Suvorov A, Scornavacca C, Fujimoto MS, Bodily P, Clement M, Crandall KA, Whiting MF, Schrider DR, Bybee SM. 2022.** Deep Ancestral Introgression Shapes Evolutionary History of Dragonflies and Damselflies (M Matschiner, Ed.). *Systematic Biology* **71**: 526–546.
- Tendal K, Ørgaard M, Larsen B, Pedersen C. 2018.** Recurrent hybridisation events between *Primula vulgaris*, *P. veris* and *P. elatior* (Primulaceae, Ericales) challenge the species boundaries: using molecular markers to re-evaluate morphological identifications. *Nordic Journal of Botany* **36**: 1–15.



**To T-H, Jung M, Lycett S, Gascuel O. 2016.** Fast Dating Using Least-Squares Criteria and Algorithms. *Systematic Biology* **65**: 82–97.

**Valentine DH. 1947.** Studies in British Primulas. I. Hybridization Between Primrose and Oxlip (Primula Vulgaris Huds. and P. Elatior Schreb.). *New Phytologist* **46**: 229–253.

**Valentine D. 1961.** Evolution in the genus Primula. *A Darwin Centenary* **71**: 87.

**de Vos J, Hughes C, Schneeweiss G, Moore B, Conti E. 2014.** Heterostyly accelerates diversification via reduced extinction in primroses. *Proceedings of the Royal Society B: Biological Sciences* **281**: 1–9.

**Woodell SR. 1969.** Natural hybridization in Britain between Primula vulgaris Huds (the primrose) and P. elatior (L.) Hill (the oxlip). *Watsonia* **7**: 115–127.
